# Supplementary material
Source: PubMed Central journal article supplement (PMC2689157)

## SUPPORTING INFORMATION

### Solution-Phase Synthesis of Pyrrole-Imidazole Polyamides

*David M. Chenoweth, Daniel A. Harki, and Peter B. Dervan\**

*Division of Chemistry and Chemical Engineering, California Institute of Technology, Pasadena, CA 91125*

#### Table of Contents for Supporting NMR Spectra

| <b><u>Compound</u></b>                                                                                                        | <b><u>Page</u></b> |
|-------------------------------------------------------------------------------------------------------------------------------|--------------------|
| <sup>1</sup> H NMR of HCl•H <sub>2</sub> N-Py-CO <sub>2</sub> Me ( <b>10</b> )                                                | S2                 |
| <sup>13</sup> C NMR of HCl•H <sub>2</sub> N-Py-CO <sub>2</sub> Me ( <b>10</b> )                                               | S3                 |
| <sup>1</sup> H NMR of BocHN-PyPy-CO <sub>2</sub> Me ( <b>11</b> )                                                             | S4                 |
| <sup>13</sup> C NMR of BocHN-PyPy-CO <sub>2</sub> Me ( <b>11</b> )                                                            | S5                 |
| <sup>1</sup> H NMR of HCl•H <sub>2</sub> N-PyPy-CO <sub>2</sub> Me ( <b>12</b> )                                              | S6                 |
| <sup>13</sup> C NMR of HCl•H <sub>2</sub> N-PyPy-CO <sub>2</sub> Me ( <b>12</b> )                                             | S7                 |
| <sup>1</sup> H NMR of BocHN-PyPyPy-CO <sub>2</sub> Me ( <b>13</b> )                                                           | S8                 |
| <sup>13</sup> C NMR of BocHN-PyPyPy-CO <sub>2</sub> Me ( <b>13</b> )                                                          | S9                 |
| <sup>1</sup> H NMR of HCl•H <sub>2</sub> N-PyPyPy-CO <sub>2</sub> Me ( <b>4</b> )                                             | S10                |
| <sup>13</sup> C NMR of HCl•H <sub>2</sub> N-PyPyPy-CO <sub>2</sub> Me ( <b>4</b> )                                            | S11                |
| <sup>1</sup> H NMR of ImPyPyPy-CO <sub>2</sub> Me ( <b>14</b> )                                                               | S12                |
| <sup>13</sup> C NMR of ImPyPyPy-CO <sub>2</sub> Me ( <b>14</b> )                                                              | S13                |
| <sup>1</sup> H NMR of ImPyPyPy-CO <sub>2</sub> H ( <b>3</b> )                                                                 | S14                |
| <sup>13</sup> C NMR of ImPyPyPy-CO <sub>2</sub> H ( <b>3</b> )                                                                | S15                |
| <sup>1</sup> H NMR of BocHN-( <i>R</i> ) <sup>β</sup> -CbzHN <sub>γ</sub> -Im-CO <sub>2</sub> Et ( <b>15</b> )                | S16                |
| <sup>13</sup> C NMR of BocHN-( <i>R</i> ) <sup>β</sup> -CbzHN <sub>γ</sub> -Im-CO <sub>2</sub> Et ( <b>15</b> )               | S17                |
| <sup>1</sup> H NMR of HCl•H <sub>2</sub> N-( <i>R</i> ) <sup>β</sup> -CbzHN <sub>γ</sub> -Im-CO <sub>2</sub> Et ( <b>5</b> )  | S18                |
| <sup>13</sup> C NMR of HCl•H <sub>2</sub> N-( <i>R</i> ) <sup>β</sup> -CbzHN <sub>γ</sub> -Im-CO <sub>2</sub> Et ( <b>5</b> ) | S19                |
| <sup>1</sup> H NMR of ImPyPyPy-( <i>R</i> ) <sup>β</sup> -CbzHN <sub>γ</sub> -Im-CO <sub>2</sub> Et ( <b>16</b> )             | S20                |
| <sup>13</sup> C NMR of ImPyPyPy-( <i>R</i> ) <sup>β</sup> -CbzHN <sub>γ</sub> -Im-CO <sub>2</sub> Et ( <b>16</b> )            | S21                |
| <sup>1</sup> H NMR of ImPyPyPy-( <i>R</i> ) <sup>β</sup> -CbzHN <sub>γ</sub> -Im-CO <sub>2</sub> H ( <b>17</b> )              | S22                |
| <sup>13</sup> C NMR of ImPyPyPy-( <i>R</i> ) <sup>β</sup> -CbzHN <sub>γ</sub> -Im-CO <sub>2</sub> H ( <b>17</b> )             | S23                |
| <sup>1</sup> H NMR of ImPyPyPy-( <i>R</i> ) <sup>β</sup> -CbzHN <sub>γ</sub> -ImPyPyPy-CO <sub>2</sub> Me ( <b>2</b> )        | S24                |
| <sup>13</sup> C NMR of ImPyPyPy-( <i>R</i> ) <sup>β</sup> -CbzHN <sub>γ</sub> -ImPyPyPy-CO <sub>2</sub> Me ( <b>2</b> )       | S25                |
| <sup>1</sup> H NMR of ImPyPyPy-( <i>R</i> ) <sup>β</sup> -CbzHN <sub>γ</sub> -ImPyPyPy-CO <sub>2</sub> H ( <b>22</b> )        | S26                |
| <sup>13</sup> C NMR of ImPyPyPy-( <i>R</i> ) <sup>β</sup> -CbzHN <sub>γ</sub> -ImPyPyPy-CO <sub>2</sub> H ( <b>22</b> )       | S27                |
| <sup>1</sup> H NMR of BocHN-(+)- <sup>BnO</sup> IPA ( <b>20</b> )                                                             | S28                |
| <sup>13</sup> C NMR of BocHN-(+)- <sup>BnO</sup> IPA ( <b>20</b> )                                                            | S29                |
| <sup>1</sup> H NMR of ImPyPyPy-( <i>R</i> ) <sup>β</sup> -CbzHN <sub>γ</sub> -ImPyPyPy-(+)- <sup>BnO</sup> IPA ( <b>23</b> )  | S30                |
| <sup>13</sup> C NMR of ImPyPyPy-( <i>R</i> ) <sup>β</sup> -CbzHN <sub>γ</sub> -ImPyPyPy-(+)- <sup>BnO</sup> IPA ( <b>23</b> ) | S31                |
| <sup>1</sup> H NMR of ImPyPyPy-( <i>R</i> ) <sup>β</sup> -H <sub>2</sub> N <sub>γ</sub> -ImPyPyPy-(+)-IPA ( <b>1</b> )        | S32                |
| <sup>13</sup> C NMR of ImPyPyPy-( <i>R</i> ) <sup>β</sup> -H <sub>2</sub> N <sub>γ</sub> -ImPyPyPy-(+)-IPA ( <b>1</b> )       | S33                |

exp1 Proton

```
SAMPLE          SPECIAL
date Oct 11 2008 temp          23.0
solvent dmsso gain          not used
file /home/autouse~ spin        not used
r/vnmrSYS/data/aut~ hst          0.008
o_2008.10.08/s_200~ pw90        9.900
81011_12/data/Prot~ alfa        6.600
on_01.fid
ACQUISITION     il            n
sw 8000.0 in            n
at 2.048 dp            y
np 32762 hs           nn
fb not used
bs 32 lb            0.20
ss 2 fn            65536
dl 1.000
nt 64 sp            -9.5
ct 64 wp            5997.3
TRANSMITTER     rfl            2246.1
tn H1 rfp           1244.4
sfrq 499.772 rp       39.6
tof 499.6 lp         0.5
tpwr 61
pw 4.950 wc          240
DECOUPLER       sc            0
dn C13 vs           26
dof 0 th            4
dm nnn ai cdc ph
dmm c
dpwr 35
dmf 32258
```

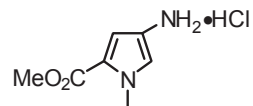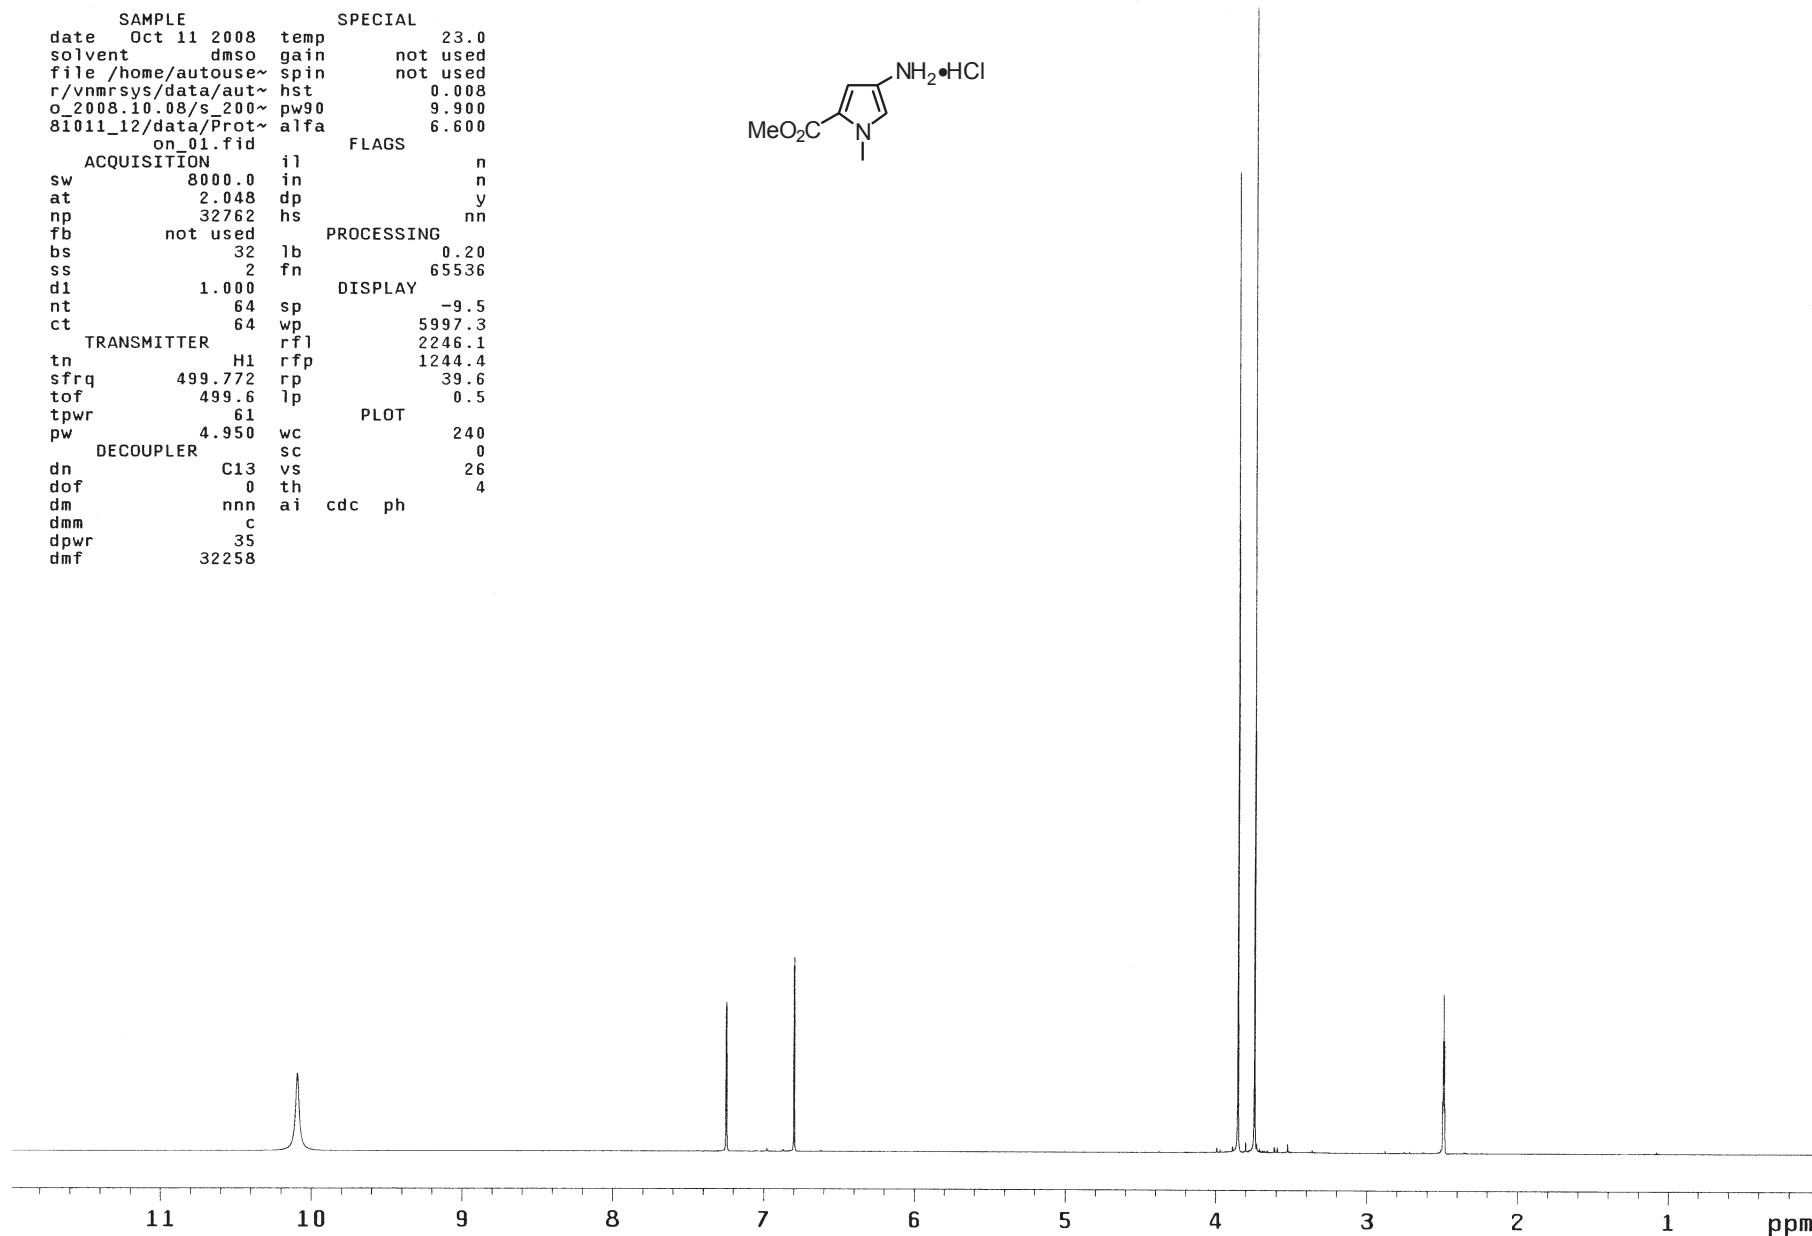

exp1 Carbon

```
SAMPLE SPECIAL
date Oct 12 2008 temp 23.0
solvent dmso gain 30
file /home/autouse~ spin not used
r/vnmrSYS/data/aut~ hst 0.008
o_2008.10.08/s_200~ pw90 8.500
8I011_17/data/Carb~ alfa 10.000
on_01.fid
ACQUISITION il n
sw 30165.9 in n
at 1.300 dp y
np 78430 hs nn
fb not used
bs 64 lb PROCESSING 0.50
d1 1.000 fn not used
nt 4000 DISPLAY
ct 4000 sp -30.8
TRANSMITTER wp 25132.1
tn C13 rfl 6941.3
sfrq 125.680 rfp 4963.8
tof 1255.2 rp 98.6
tpwr 56 lp -106.4
pw 4.250 PLOT
DECOUPLER wc 240
dn H1 sc 0
dof 0 vs 20000
dm VVY th 12
dmm w ai cdc ph
dpwr 39
dmf 11500
```

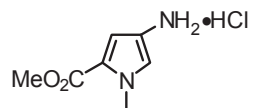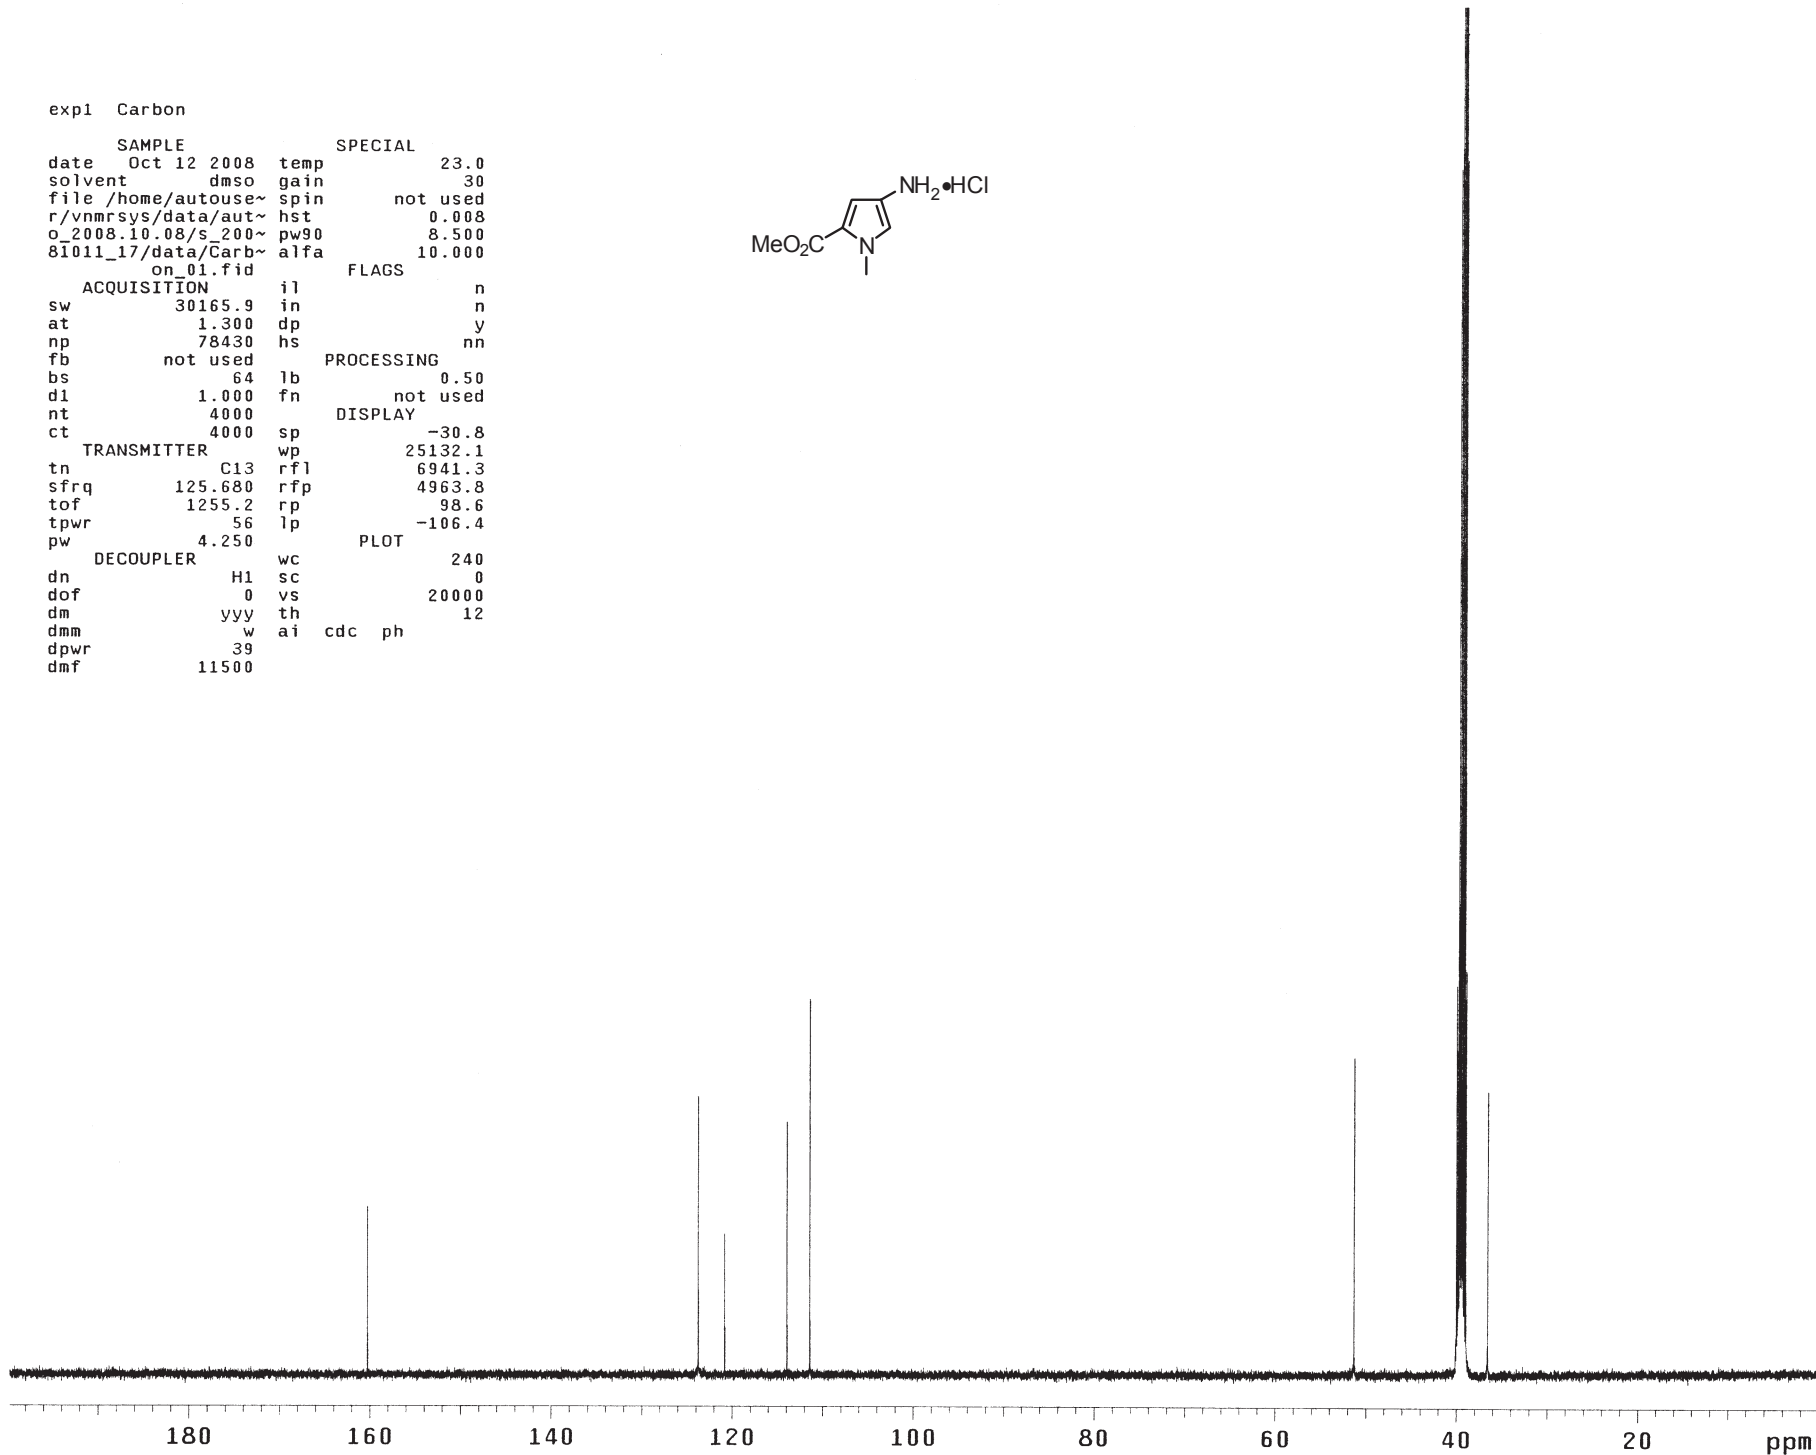

expl Proton

```
SAMPLE          SPECIAL
date   Oct 14 2008  temp      23.0
solvent dmsd         gain     not used
file   /home/autouse~  spin     not used
r/vnmr~ /data/aut~    hst      0.008
o_2008.10.12/s_200~  pw90    9.900
81014_03/data/Prot~  alfa    6.600
on_01.fid
ACQUISITION     il      n
sw      8000.0    in      n
at      2.048    dp      y
np      32762    hs      nn
fb      not used
bs      32       lb      0.20
ss      2        fn      65536
di      1.000    DISPLAY
nt      16       sp      -1.9
ct      16       wp      5995.1
TRANSMITTER     rfl      2248.8
tn      H1      rfp      1244.4
sfrq    499.772  rp      39.3
tof     499.6    lp      3.7
tpwr    61
pw      4.950    PLOT
DECOUPLER       wc      240
dn      C13     sc      0
dof     0       vs      49
dm      nnn     th      4
dmm     c       ai    cdc ph
dpwr    35
dmf     32258
```

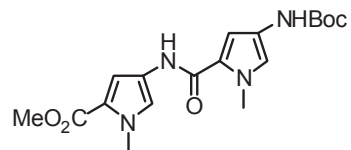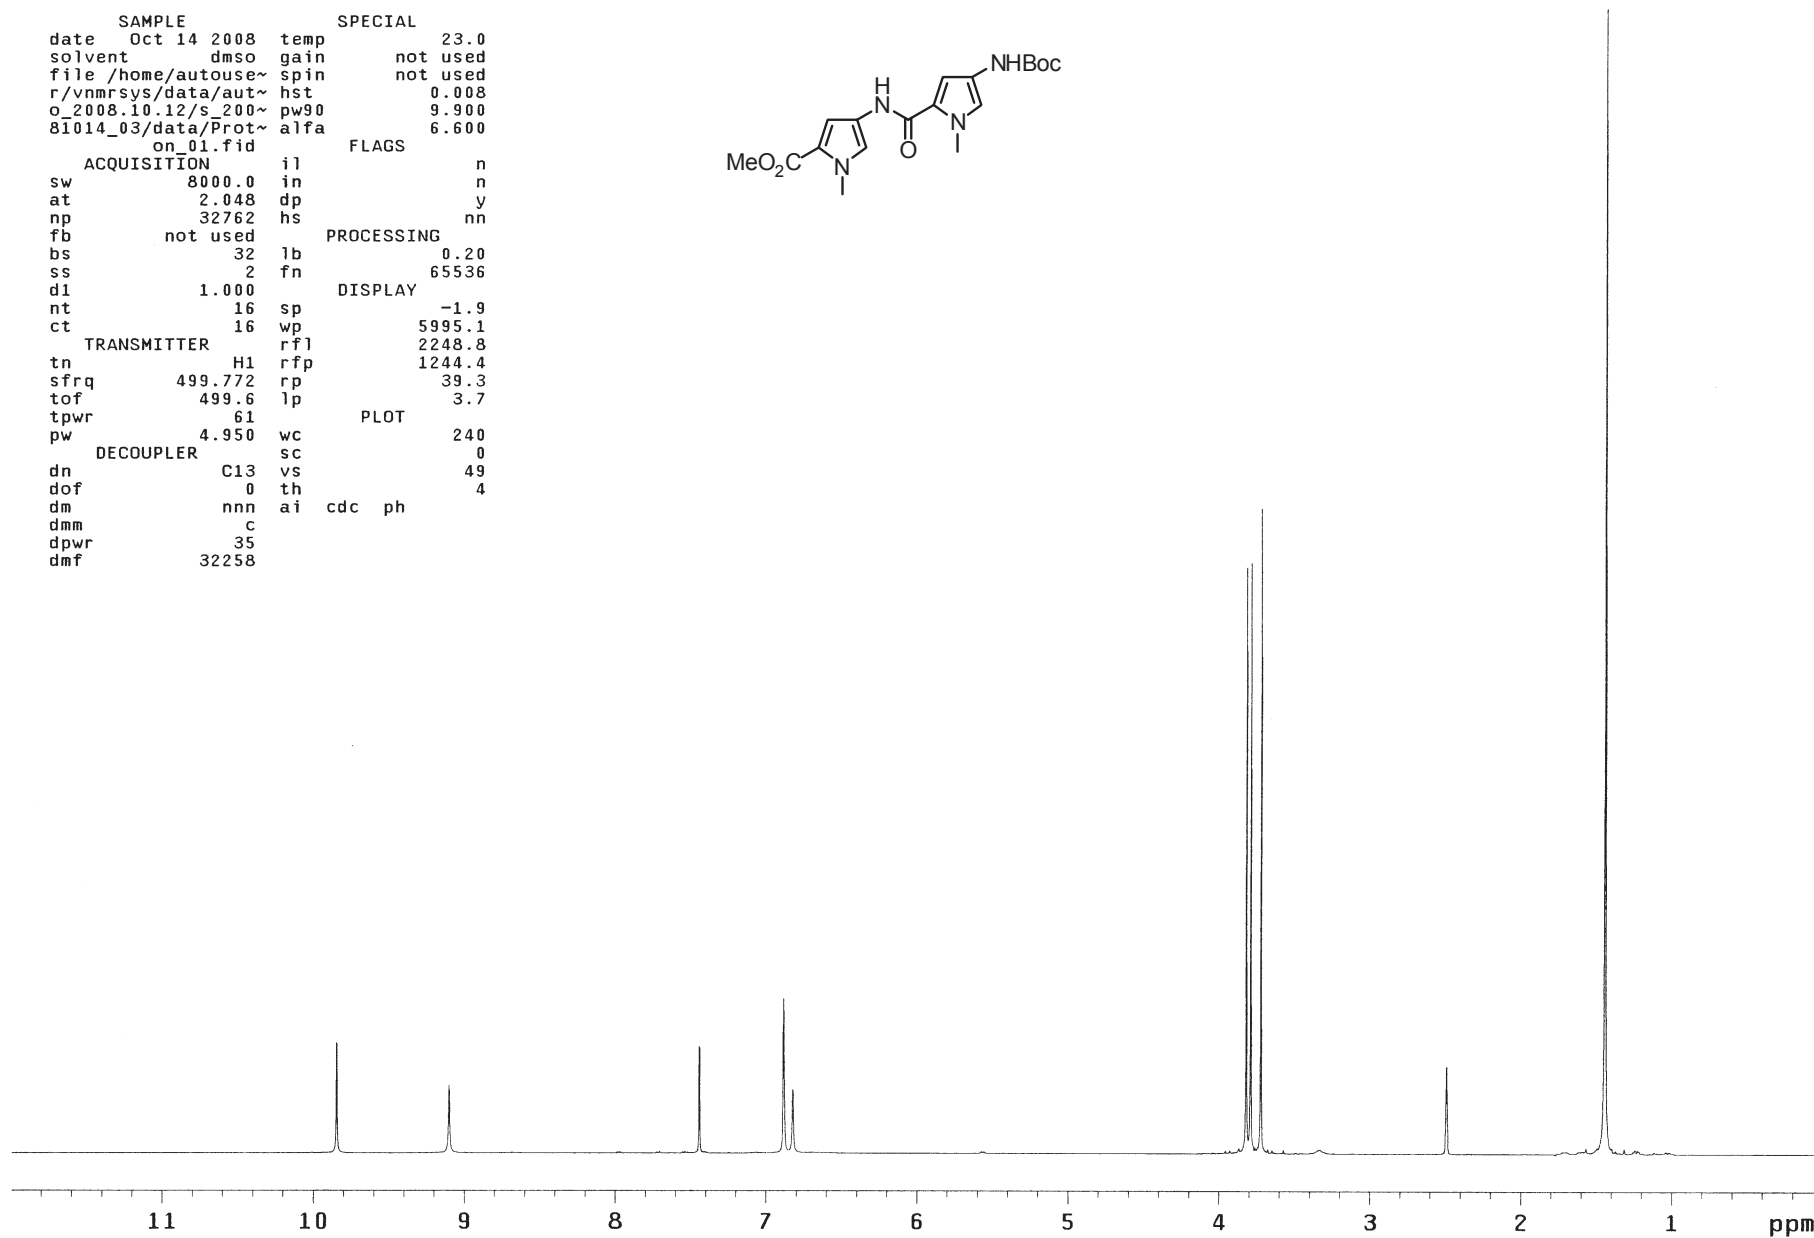

expl Carbon

```
SAMPLE SPECIAL
date Oct 14 2008 temp 23.0
solvent dms0 gain 30
file /home/autouse~ spin not used
r/vnmr/sys/data/aut~ hst 0.008
o_2008.10.12/s_200~ pw90 8.500
81014_03/data/Carb~ alfa 10.000
on_01.fid
ACQUISITION i1 n
sw 30165.9 in n
at 1.300 dp y
np 78430 hs nn
fb not used
bs 64 lb 0.50
d1 1.000 fn not used
nt 1000
ct 1000
TRANSMITTER
tn C13
sfrq 125.680
tof 1255.2
tpwr 56
pw 4.250
DECOUPLER
dn H1
dof 0
dm vvy
dmm w
dpwr 39
dmf 11500
```

```
FLAGS
PROCESSING
DISPLAY
PLOT
```

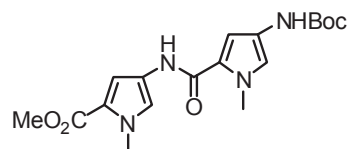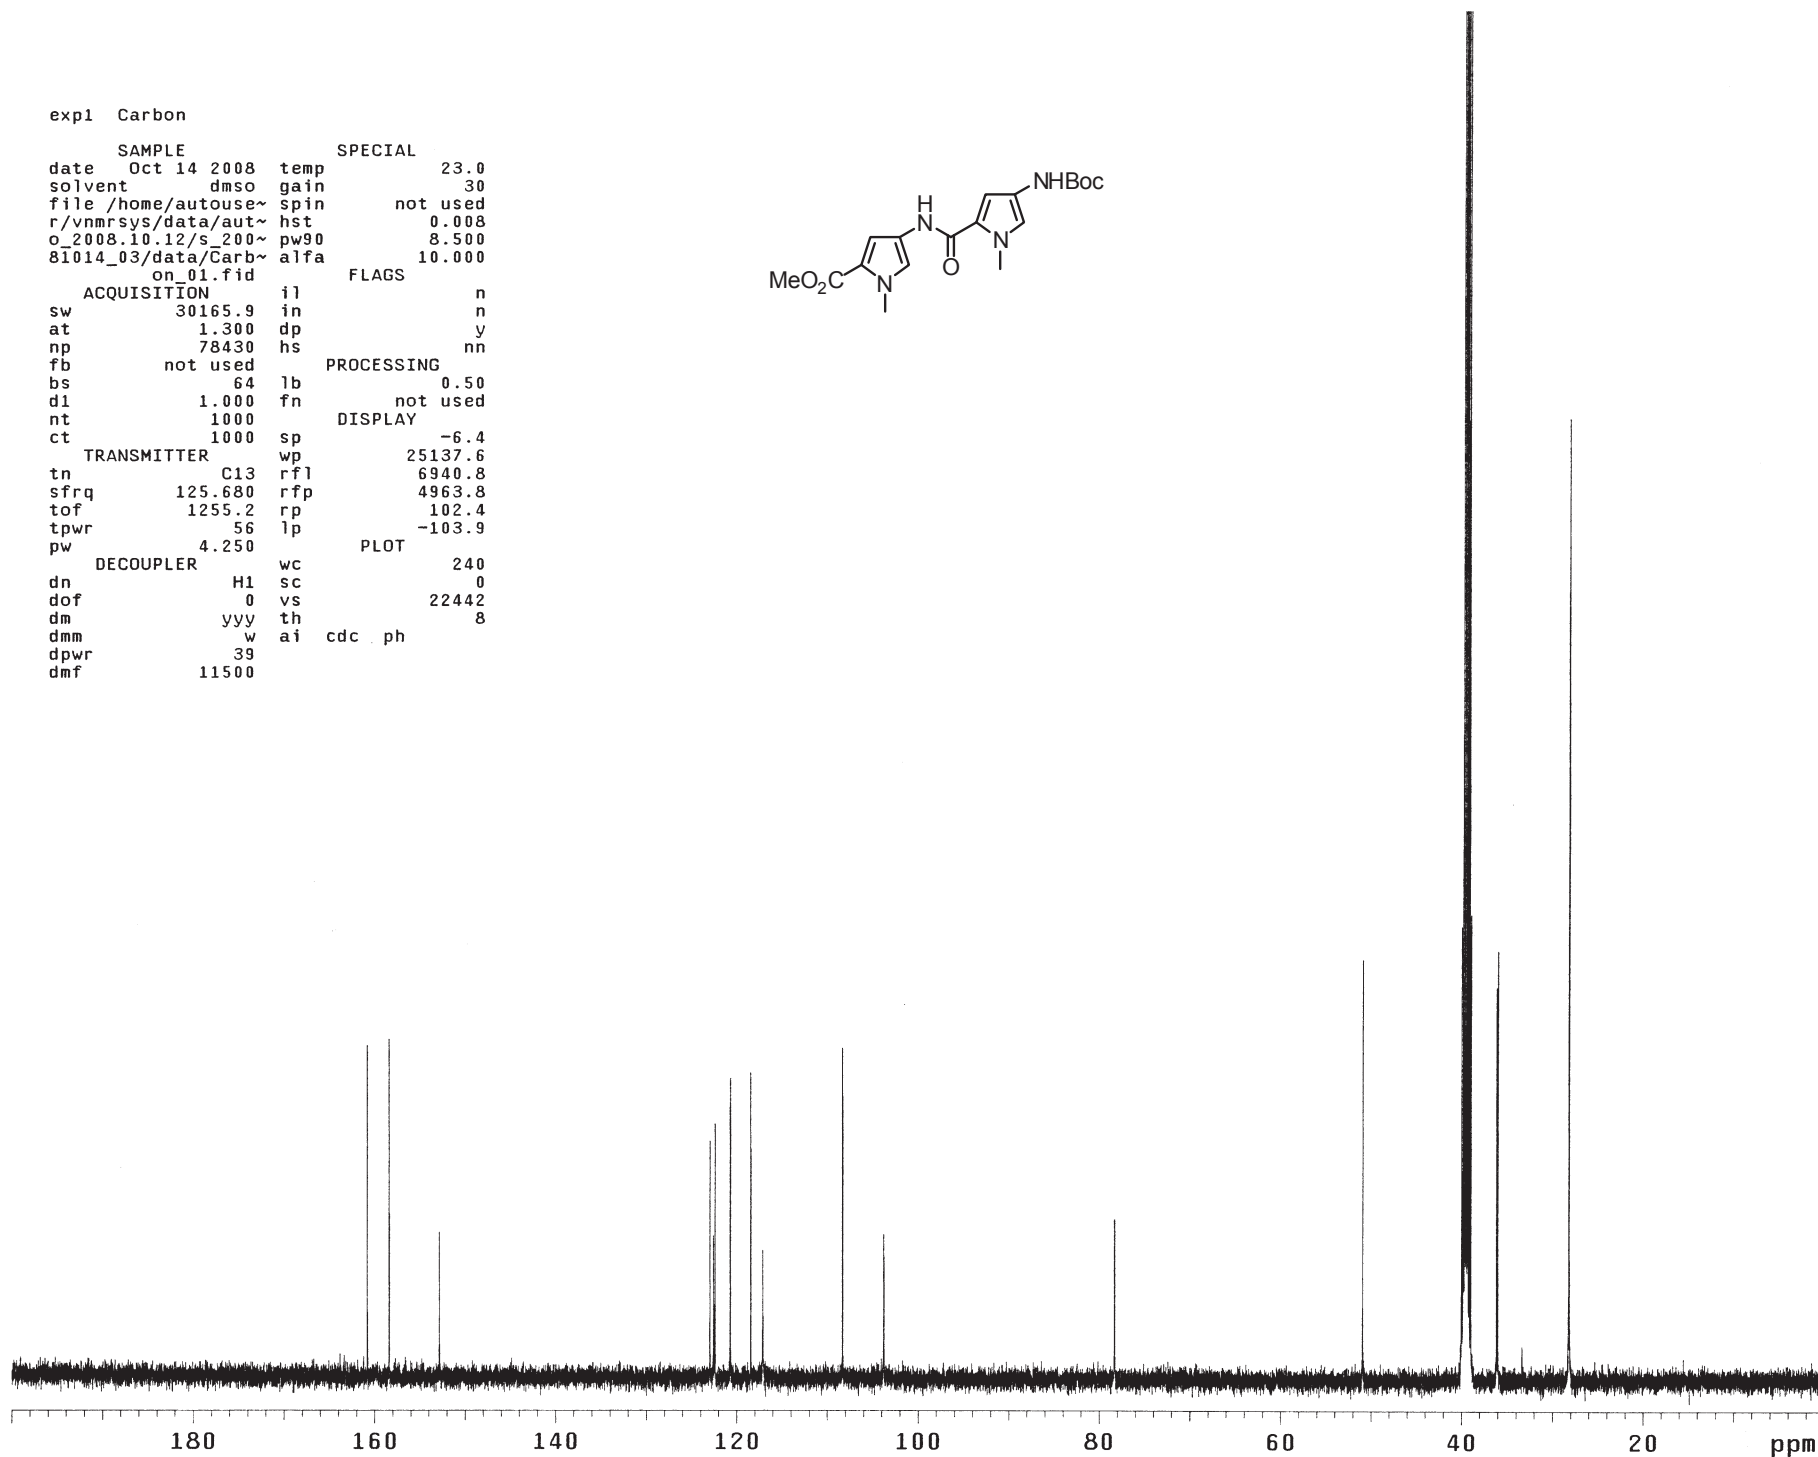

exp1 Proton

SAMPLE SPECIAL  
date Oct 14 2008 temp 23.0  
solvent dms0 gain not used  
file /home/autouse~ spin not used  
r/vnmrSYS/data/aut~ hst 0.008  
o\_2008.10.12/s\_200~ pw90 9.900  
81013\_20/data/Prot~ alfa 6.600  
on\_01.fid  
ACQUISITION il FLAGS n  
sw 8000.0 in n  
at 2.048 dp y  
np 32762 hs nn  
fb not used  
bs 32 lb PROCESSING 0.20  
ss 2 fn 65536  
d1 1.000 DISPLAY  
nt 64 sp -10.5  
ct 64 wp 5995.1  
TRANSMITTER H1 rfl 2248.3  
tn H1 rfp 1244.4  
sfrq 499.772 rp 46.8  
tof 499.6 lp 5.7  
tpwr 61 PLOT  
pw 4.950 wc 240  
DECOUPLER C13 sc 0  
dn C13 vs 41  
dof 0 th 6  
dm nnn ai cdc ph  
dmm c  
dpwr 35  
dmf 32258

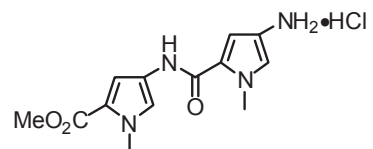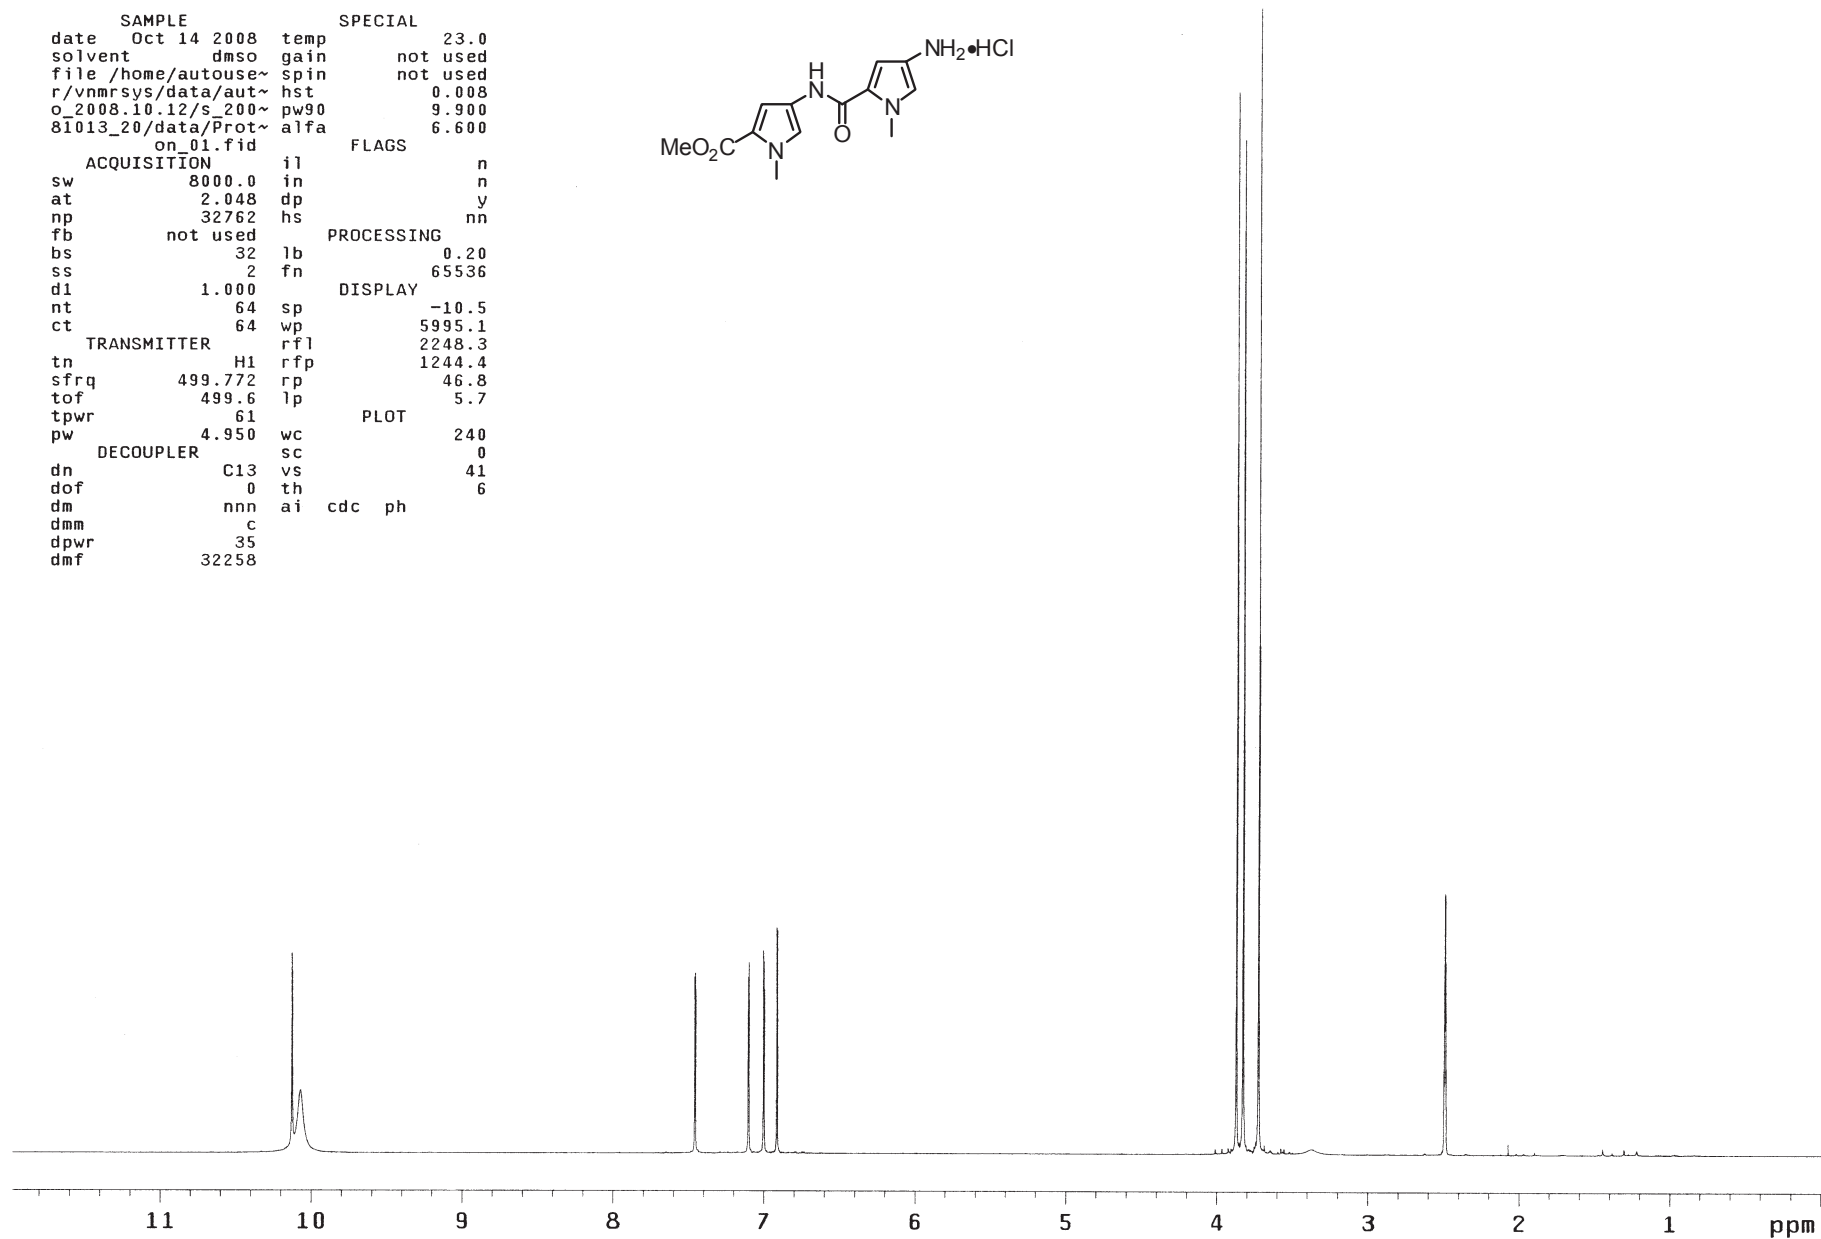

exp1 Carbon

```
SAMPLE SPECIAL
date Oct 14 2008 temp 23.0
solvent dms0 gain 30
file /home/autouse~ spin not used
r/vnmrsys/data/aut~ hst 0.008
o_2008.10.12/s_200~ pw90 8.500
81013_20/data/Carb~ alfa 10.000
on_01.fid
ACQUISITION il n
sw 30165.9 in n
at 1.300 dp y
np 78430 hs nn
fb not used
bs 64 lb 0.50
dl 1.000 fn not used
nt 6000
ct 6000 sp -1.8
TRANSMITTER wp 25126.1
tn C13 rfl 6940.8
sfrq 125.680 rfp 4963.8
tof 1255.2 rp 104.4
tpwr 56 lp -120.6
pw 4.250
DECOUPLER wc 240
dn H1 sc 0
dof 0 vs 25000
dm yyy th 9
dmm w ai cdc ph
dpwr 39
dmf 11500
```

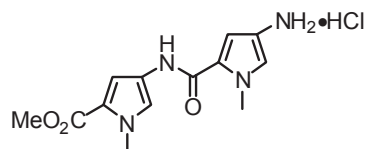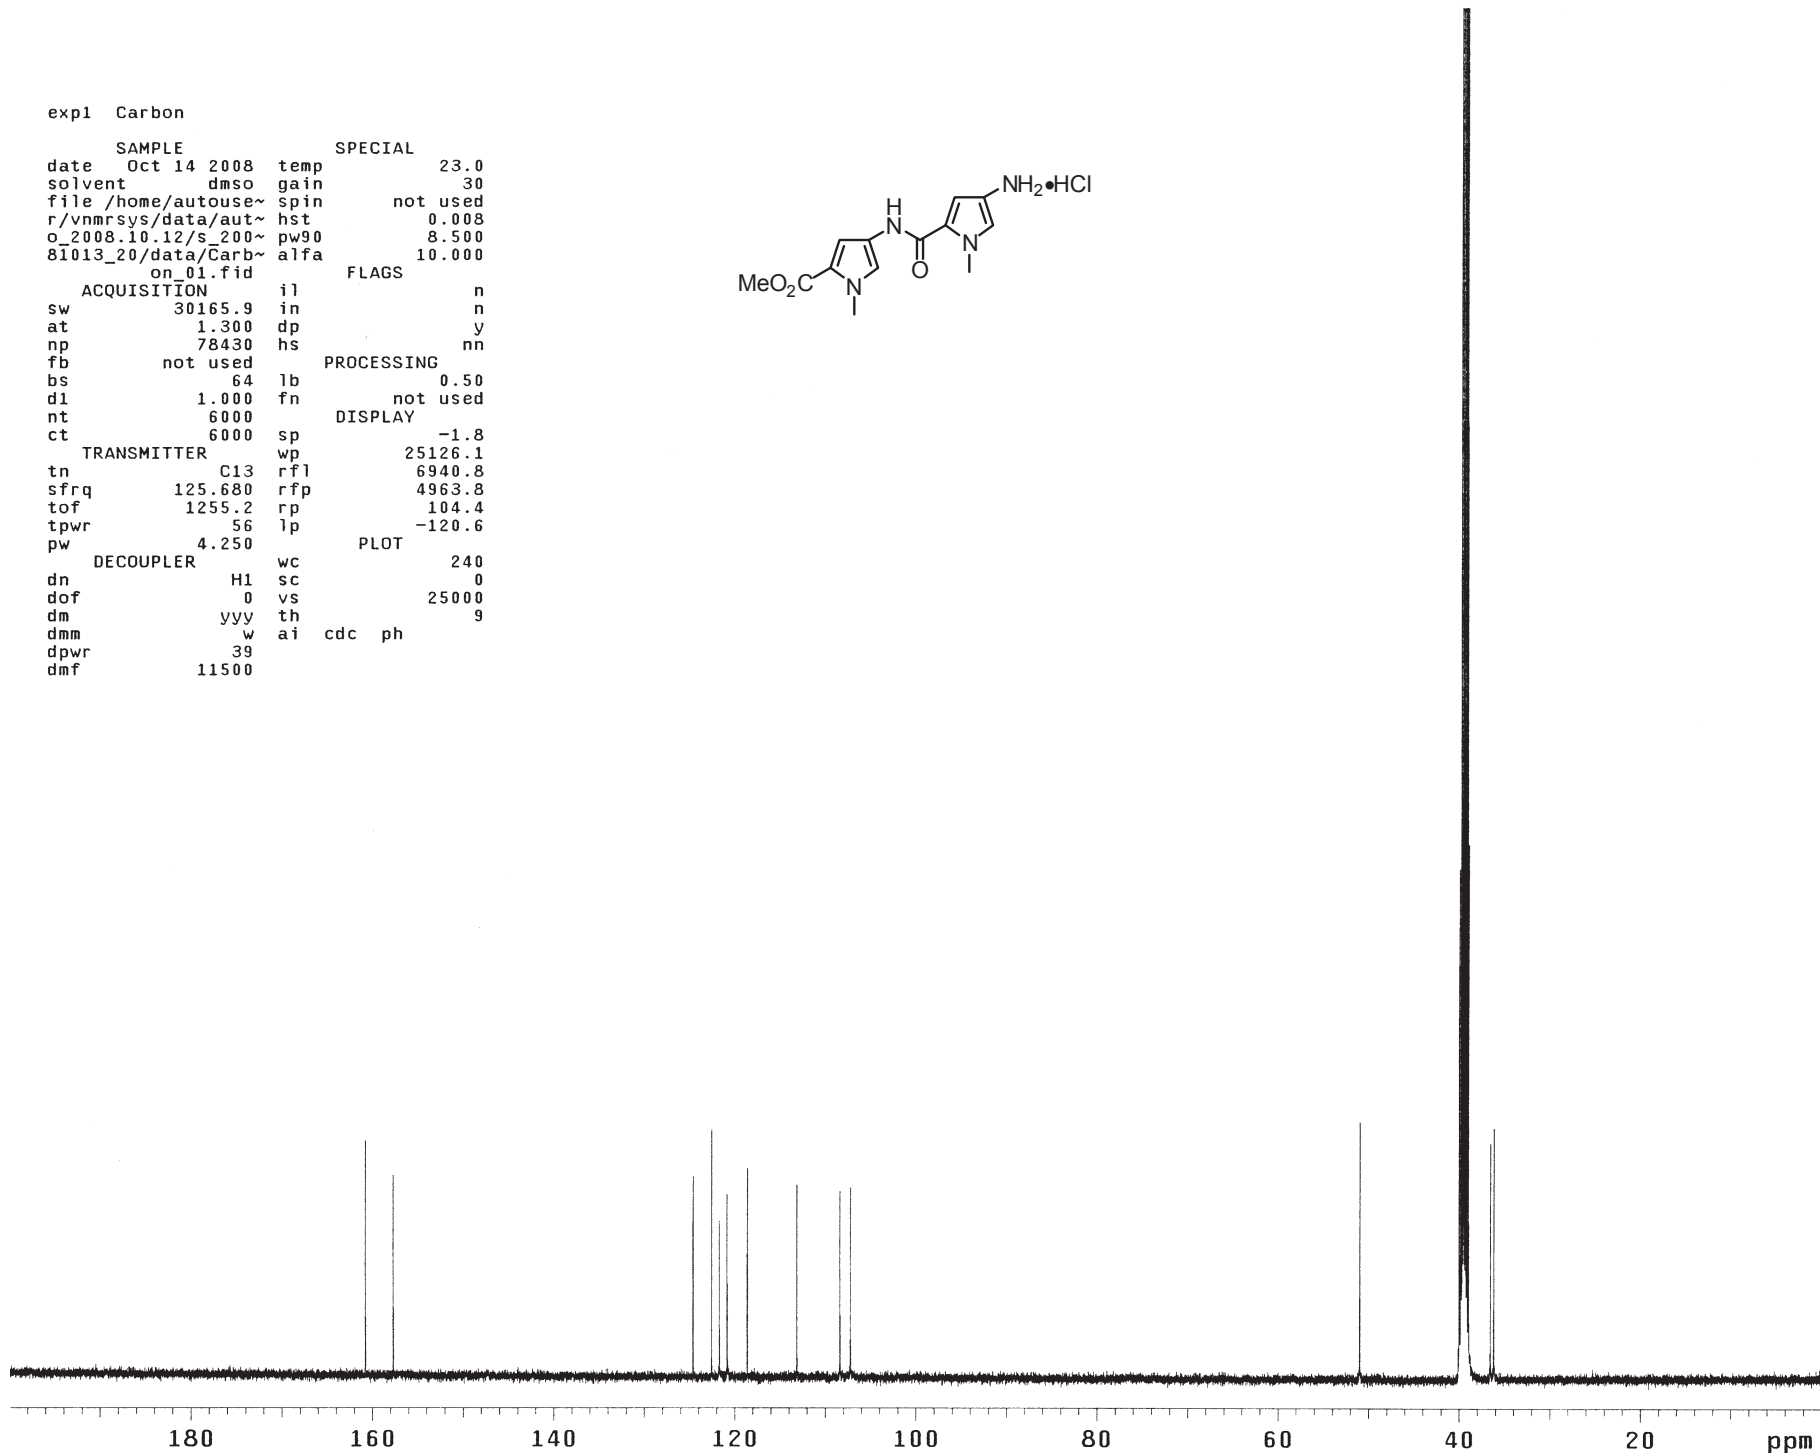





expl Carbon

```
SAMPLE SPECIAL
date Oct 13 2008 temp 23.0
solvent dms0 gain 30
file /home/autouse~ spin not used
r/vnmrsvs/data/aut~ hst 0.008
o_2008.10.12/s_200~ pw90 8.500
81012_03/data/Carb~ alfa 10.000
on_01.fid
ACQUISITION il n
sw 30165.9 in n
at 1.300 dp y
np 78430 hs nn
fb not used
bs 64 lb 0.50
d1 1.000 fn not used
nt 6000
ct 6000 sp -8.3
TRANSMITTER wp 25126.6
tn C13 rfl 6941.3
sfrq 125.680 rfp 4963.8
tof 1255.2 rp 89.5
tpwr 56 lp -79.5
pw 4.250
DECOUPLER wc 240
dn H1 sc 0
dof 0 vs 70899
dm yyy th 8
dmm w ai cdc ph
dpwr 39
dmf 11500
```

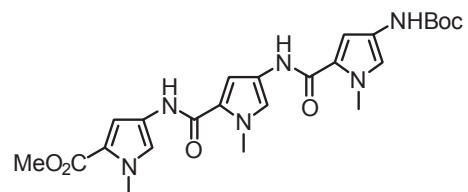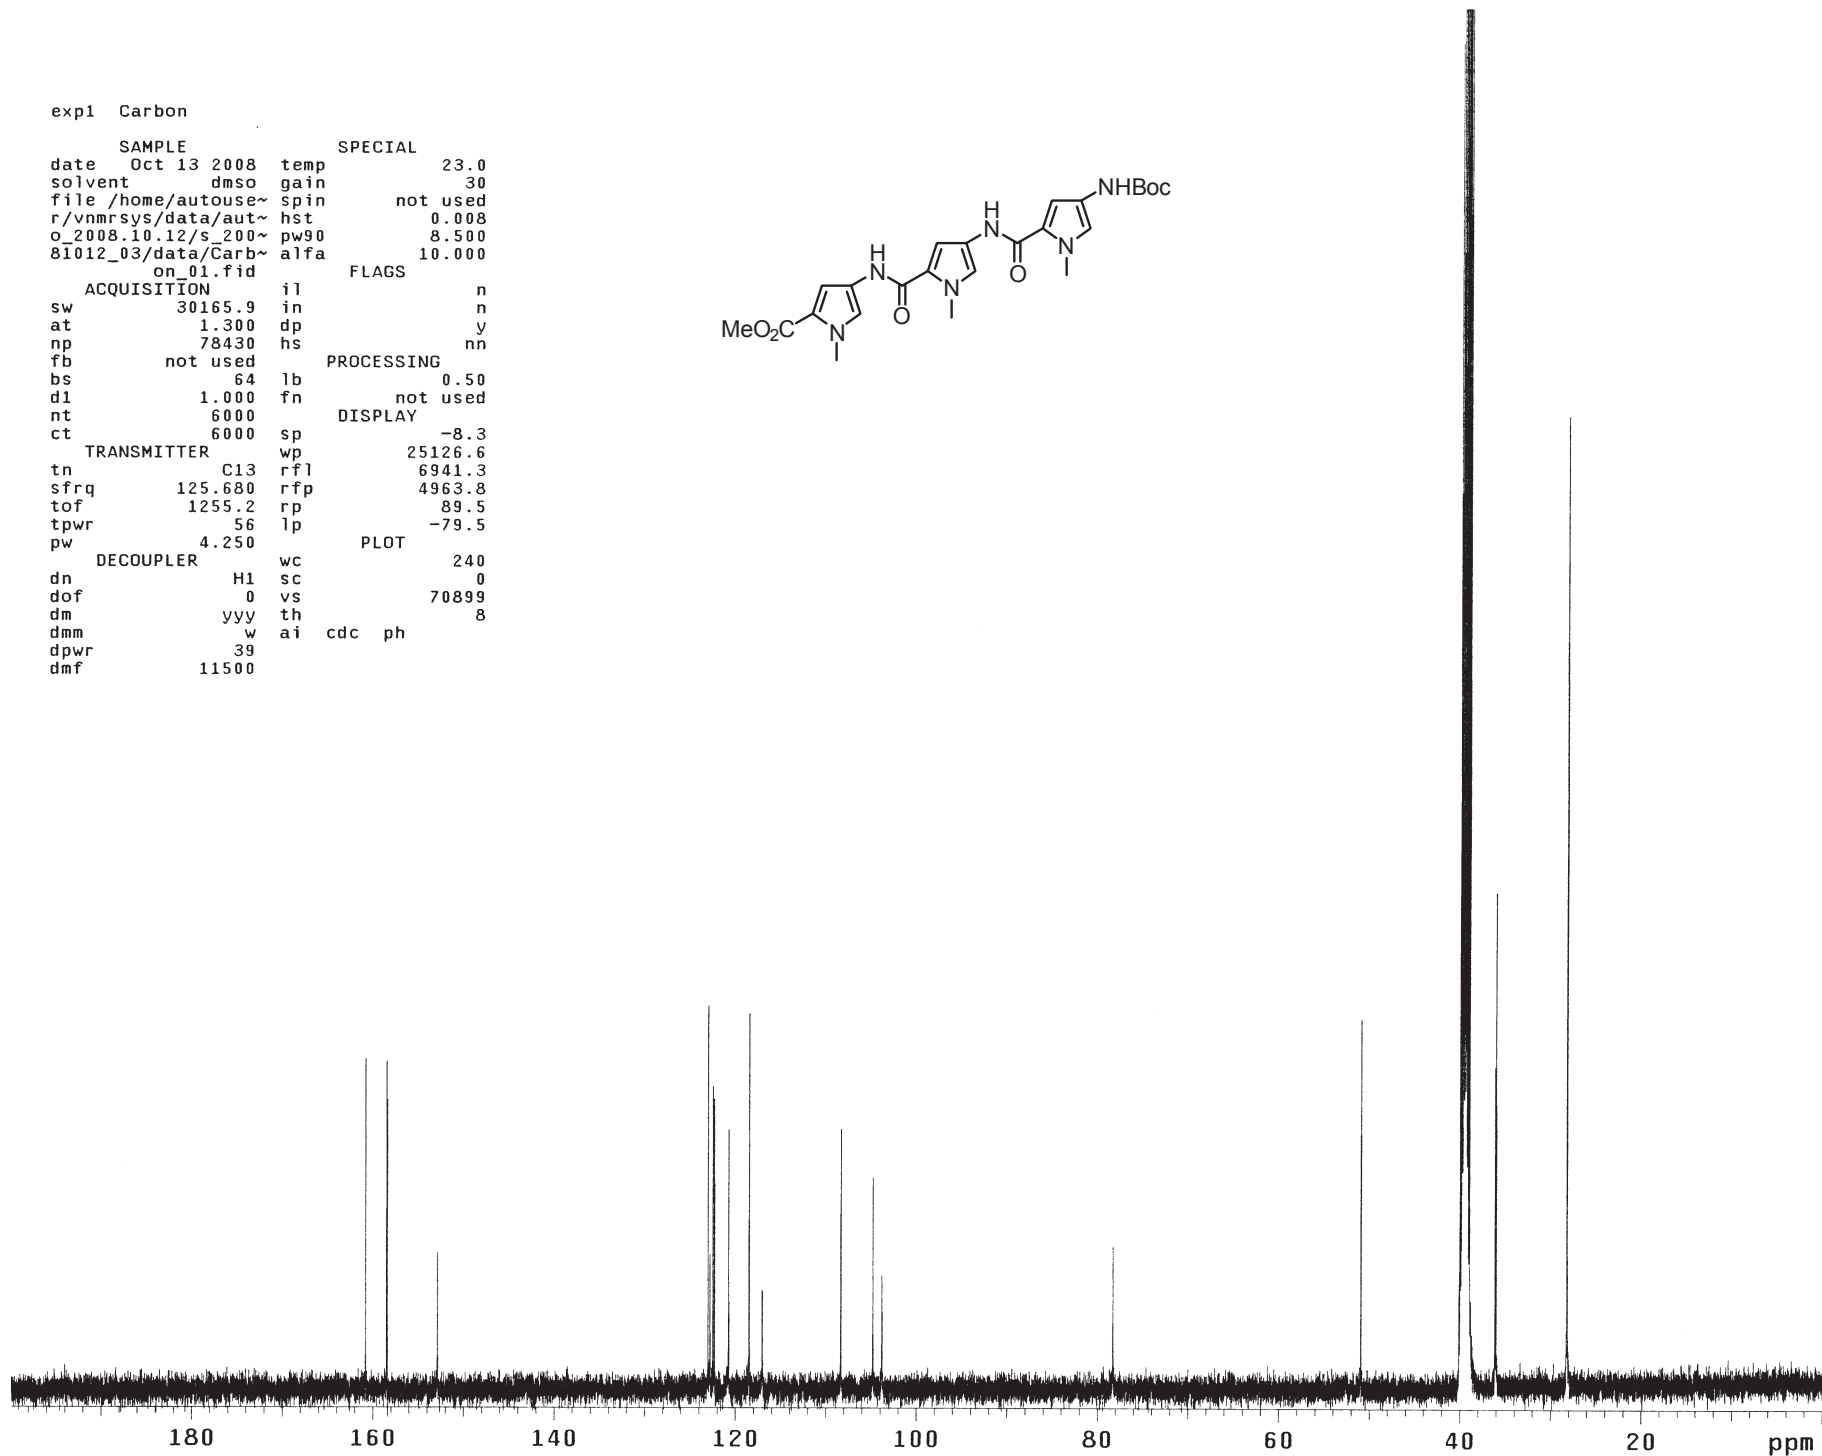

exp1 Proton

```
SAMPLE          SPECIAL
date   Oct 16 2008  temp      23.0
solvent dmsd          gain      not used
file   /home/autouse~ spin      not used
r/vnmr~ r/vnmr~ r/vnmr~ hst      0.008
o_2008.10.12/s_200~ pw90     9.900
81015_10/data/Prot~ alfa     6.600
on_01.fid
ACQUISITION    i1          n
sw             8000.0    in          n
at             2.048    dp          y
np             32762    hs          nn
fb             not used
bs             32       lb          0.20
ss             2       fn          65536
dl             1.000
nt             64       sp          -0.2
ct             64       wp          5999.8
TRANSMITTER    rf1          2249.0
tn             H1       rfp          1244.4
sfrq          499.772   rp          42.3
tof           499.6    lp          5.6
tpwr          61
pw            4.950    wc          240
DECOUPLER     sc          0
dn            C13      vs          42
dof           0       th          5
dm            nnn     ai cdc ph
dmm           c
dpwr          35
dmf           32258
```

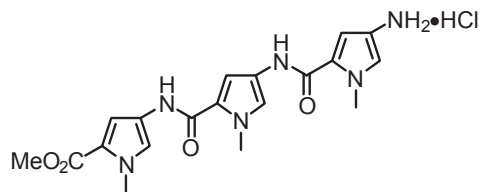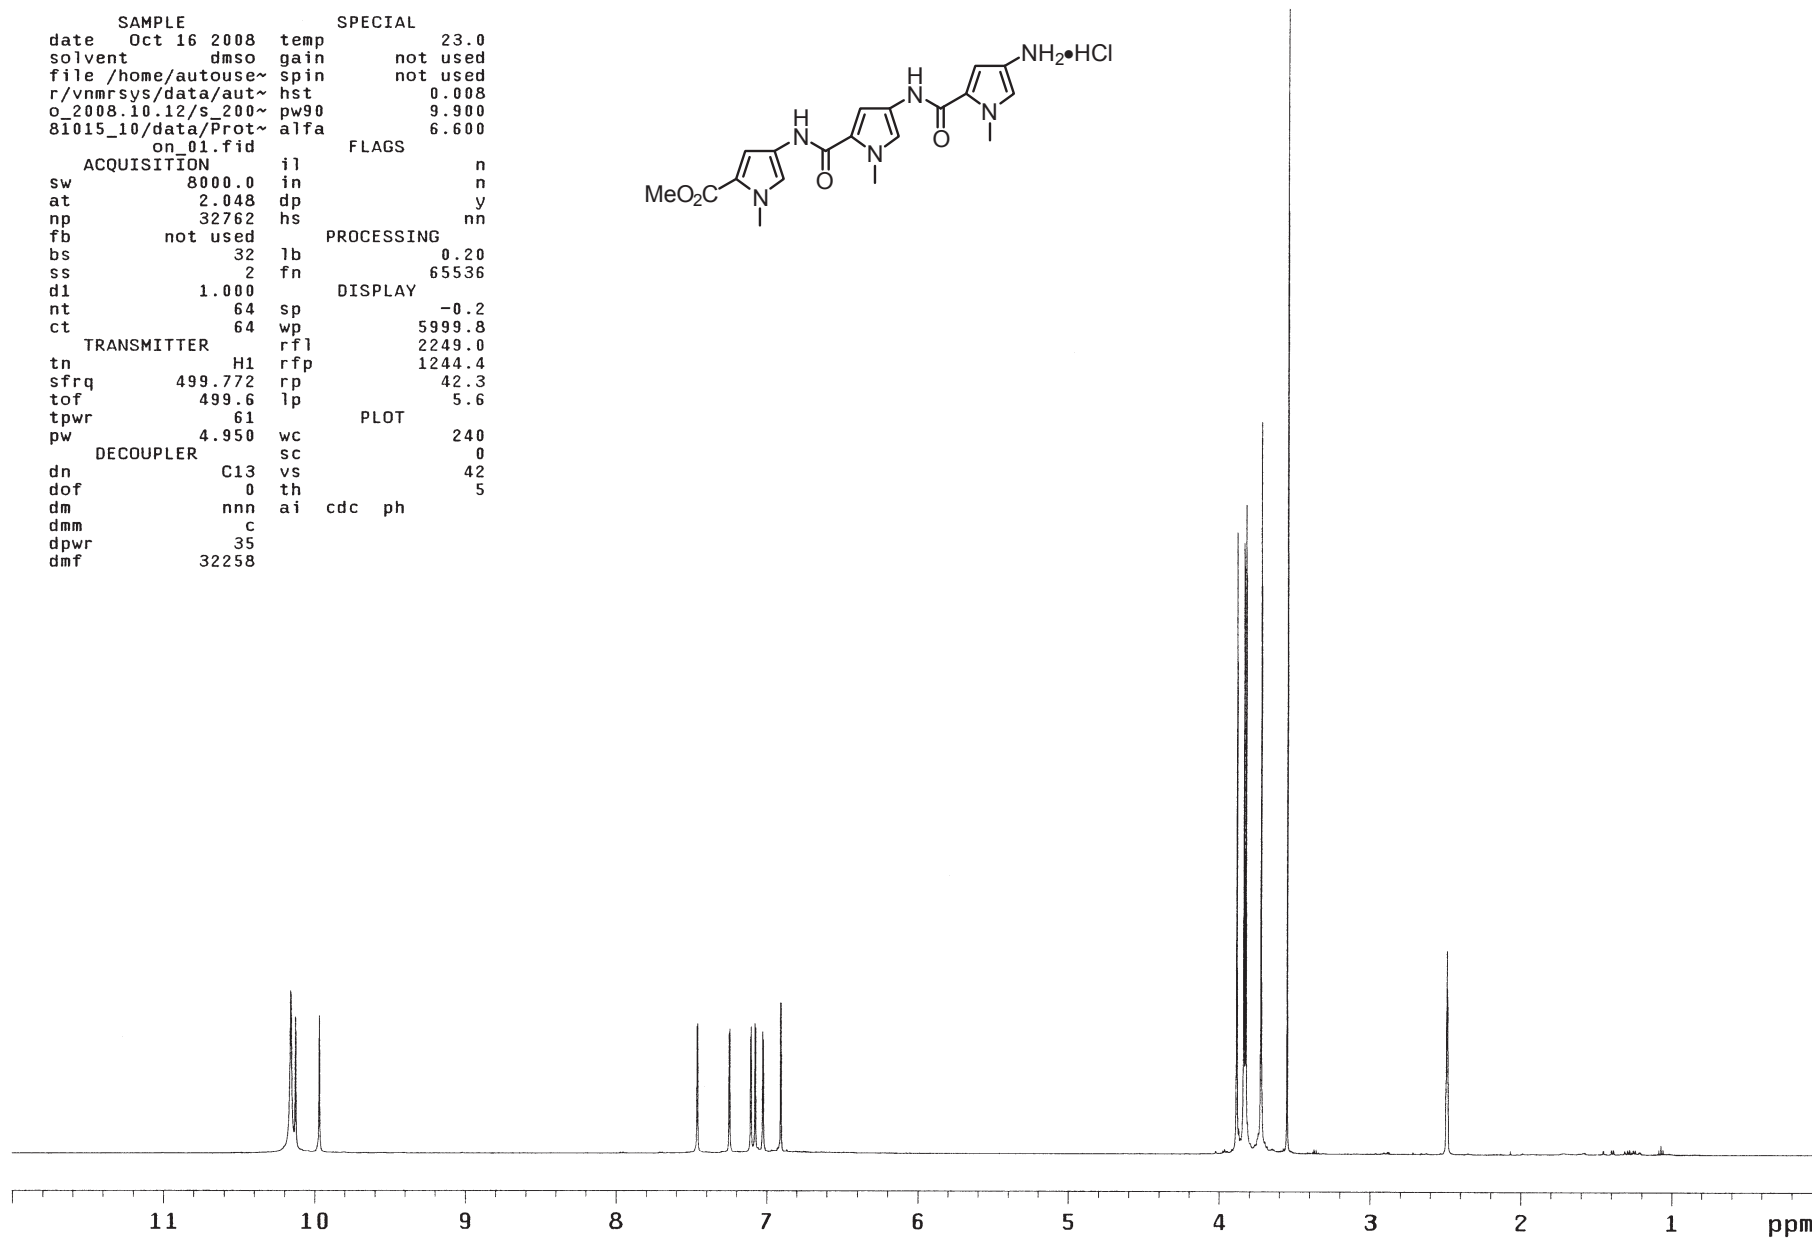

exp1 Carbon

```
SAMPLE SPECIAL
date Oct 16 2008 temp 23.0
solvent dms0 gain 30
file /home/autouse~ spin not used
r/vnmrSYS/data/aut~ hst 0.008
o_2008.10.12/s_200~ pw90 8.500
81015_10/data/Carb~ alfa 10.000
on_01.fid
ACQUISITION FLAGS
sw 30165.9 in n
at 1.300 dp y
np 78430 hs nn
fb not used
bs 64 lb 0.50
d1 1.000 fn not used
nt 4000
ct 4000
TRANSMITTER DISPLAY
tn C13 rfl 25181.8
sfrq 125.680 rfp 6939.4
tof 1255.2 rp 4963.8
tpwr 56 lp 100.1
pw 4.250 l p -116.2
DECOUPLER PLOT
dn H1 wc 240
dof 0 sc 0
dm yyy vs 37941
dmm w th 14
dpwr 39 ai cdc ph
dmf 11500
```

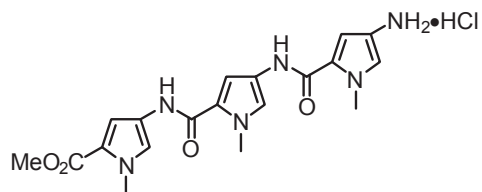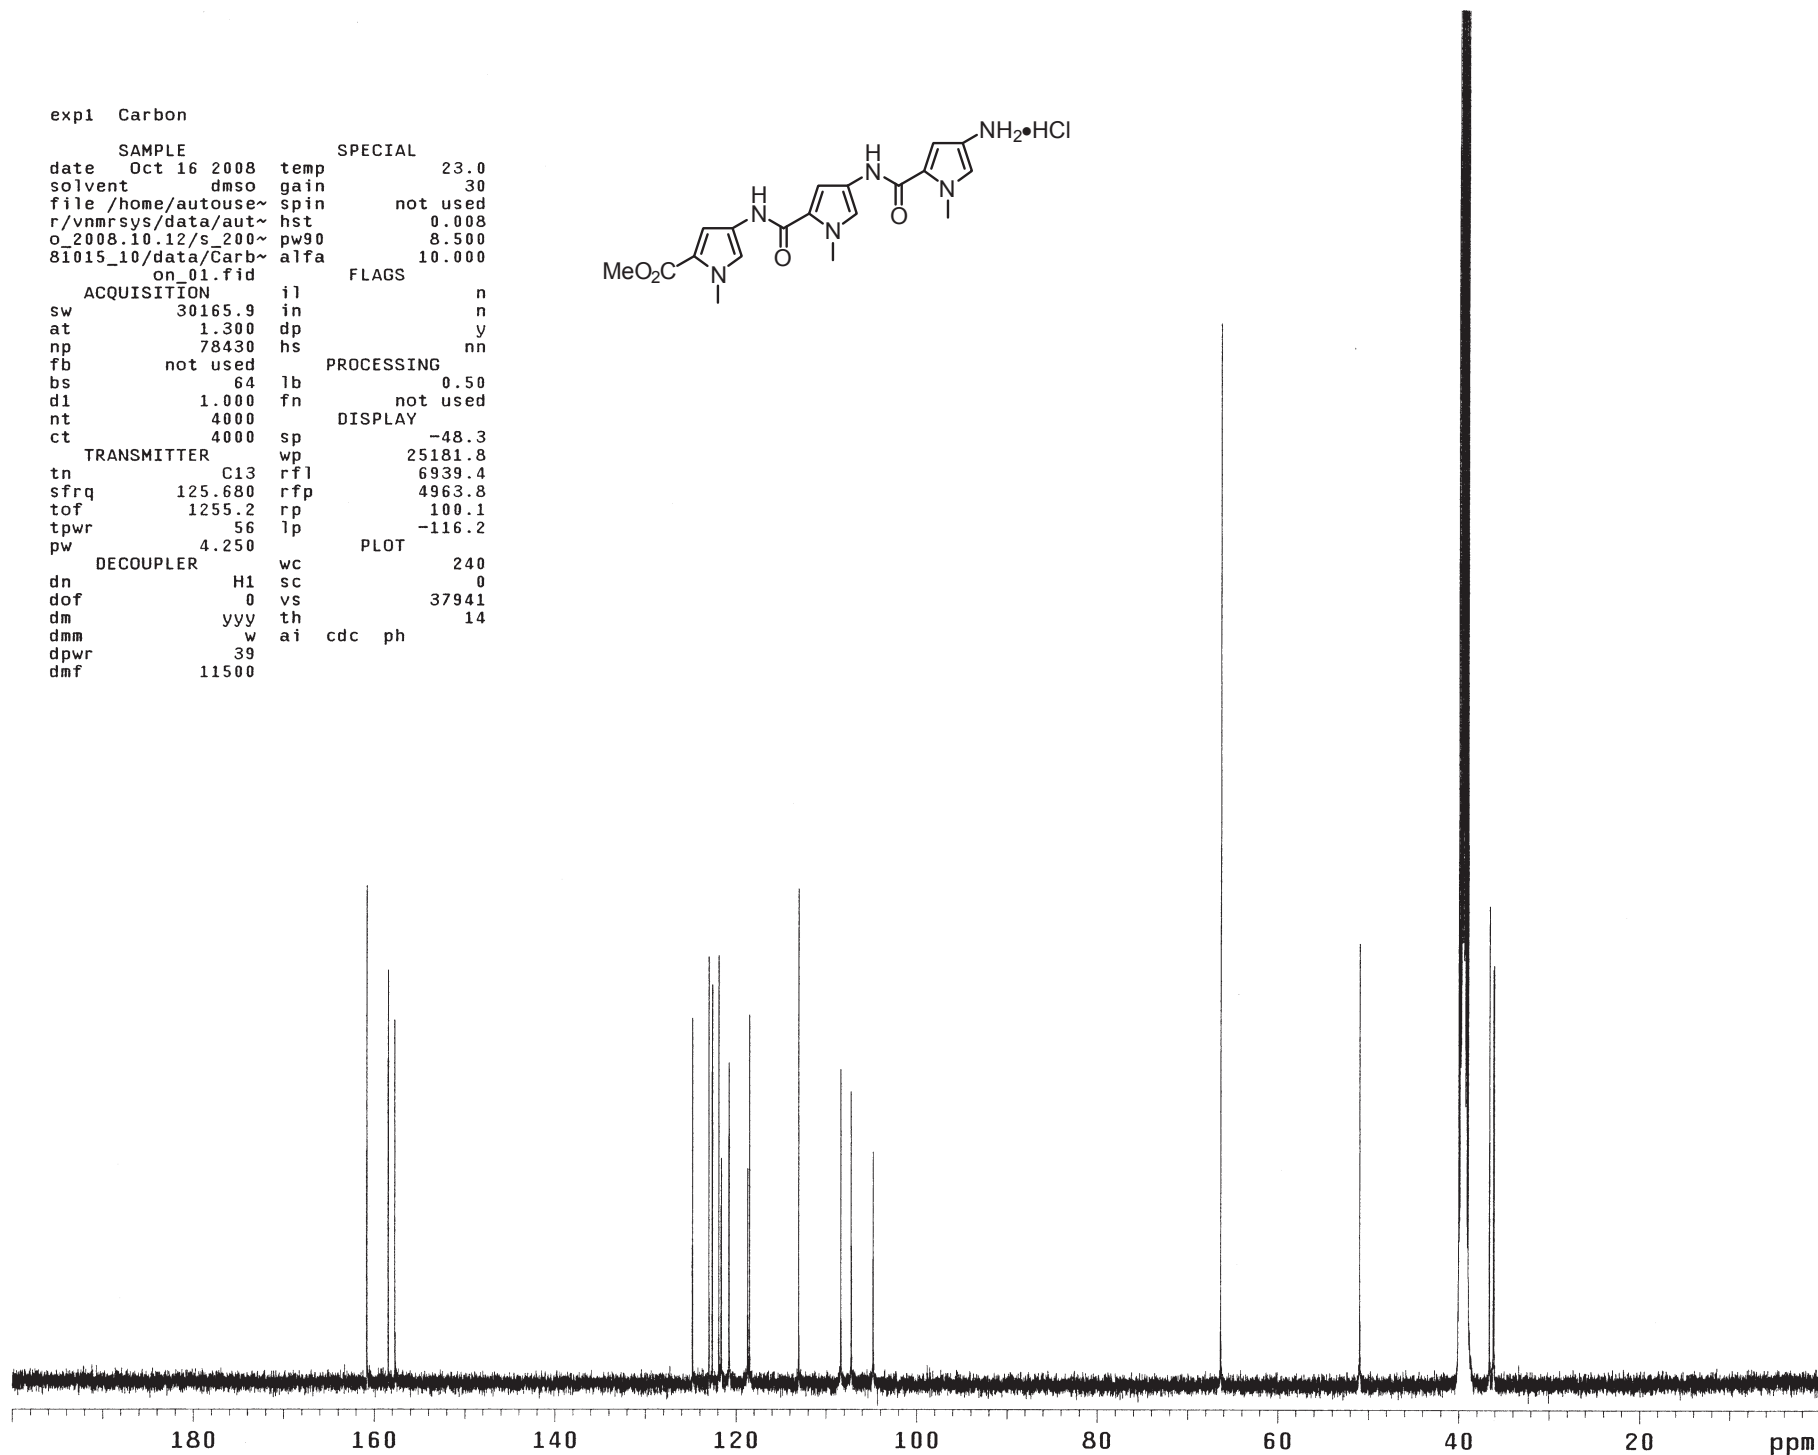

exp1 Proton

| SAMPLE              |                | SPECIAL    |          |
|---------------------|----------------|------------|----------|
| date                | Oct 14 2008    | temp       | 23.0     |
| solvent             | dmsd           | gain       | not used |
| file                | /home/autouse~ | spin       | not used |
| r/vnmr              | sys/data/aut~  | hst        | 0.008    |
| o_2008.10.12/s_200~ |                | pw90       | 9.900    |
| 81013_19/data/Prot~ |                | alfa       | 6.600    |
| on_01.fid           |                | FLAGS      |          |
| ACQUISITION         |                | il         | n        |
| sw                  | 8000.0         | in         | n        |
| at                  | 2.048          | dp         | y        |
| np                  | 32762          | hs         | nn       |
| fb                  | not used       | PROCESSING |          |
| bs                  | 32             | lb         | 0.20     |
| ss                  | 2              | fn         | 65536    |
| dl                  | 1.000          | DISPLAY    |          |
| nt                  | 64             | sp         | -10.5    |
| ct                  | 64             | wp         | 6004.2   |
| TRANSMITTER         |                | rfl        | 2248.3   |
| tn                  | H1             | rfl        | 1244.4   |
| sfrq                | 499.772        | rp         | 37.1     |
| tof                 | 499.6          | lp         | 9.0      |
| tpwr                | 61             | PLOT       |          |
| pw                  | 4.950          | wc         | 240      |
| DECOUPLER           |                | sc         | 0        |
| dn                  | C13            | vs         | 84       |
| dof                 | 0              | th         | 8        |
| dm                  | nnn            | ai         | cdc ph   |
| dmm                 | c              |            |          |
| dpwr                | 35             |            |          |
| dmf                 | 32258          |            |          |

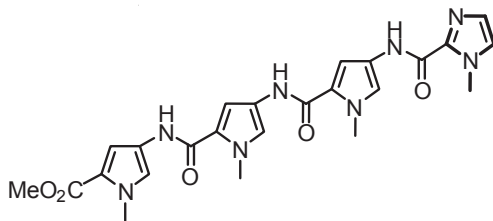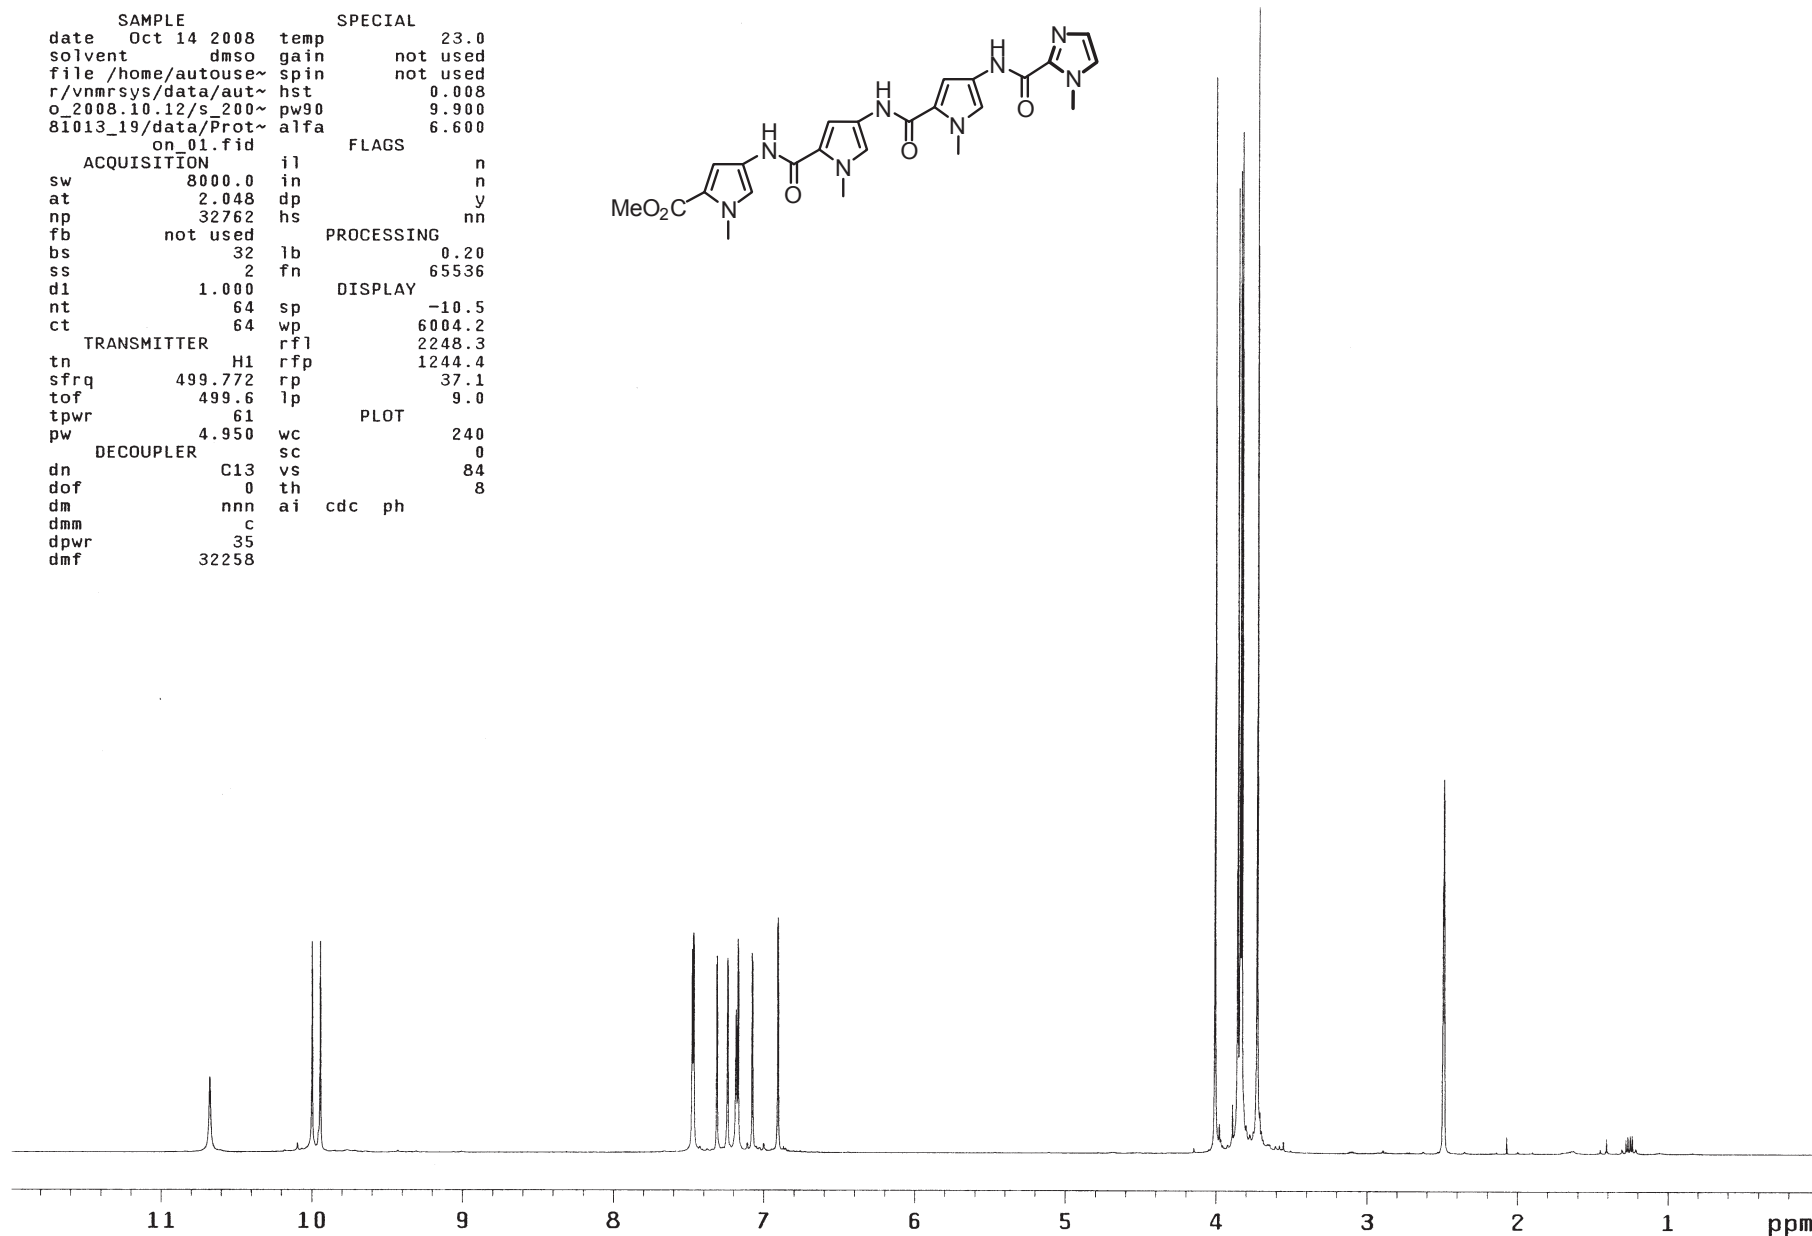

exp1 Carbon

```
SAMPLE SPECIAL
date Oct 14 2008 temp 23.0
solvent dmsd gain 30
file /home/autouse~ spin not used
r/vnmrsvs/data/aut~ hst 0.008
o_2008.10.12/s_200~ pw90 8.500
81013_19/data/Carb~ alfa 10.000
on_01.fid
ACQUISITION FLAGS
sw 30165.9 in n
at 1.300 dp y
np 78430 hs nn
fb not used
bs 64 lb 0.50
d1 1.000 fn not used
nt 5000
ct 5000 sp -1.8
TRANSMITTER wp 25126.1
tn C13 rfl 6940.8
sfrq 125.680 rfp 4963.8
tof 1255.2 rp 101.3
tpwr 56 lp -104.5
pw 4.250
DECOUPLER wc 240
dn H1 sc 0
dof 0 vs 50000
dm yyy th 5
dmm w ai cdc ph
dpwr 39
dmf 11500
```

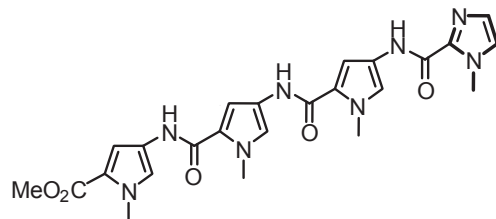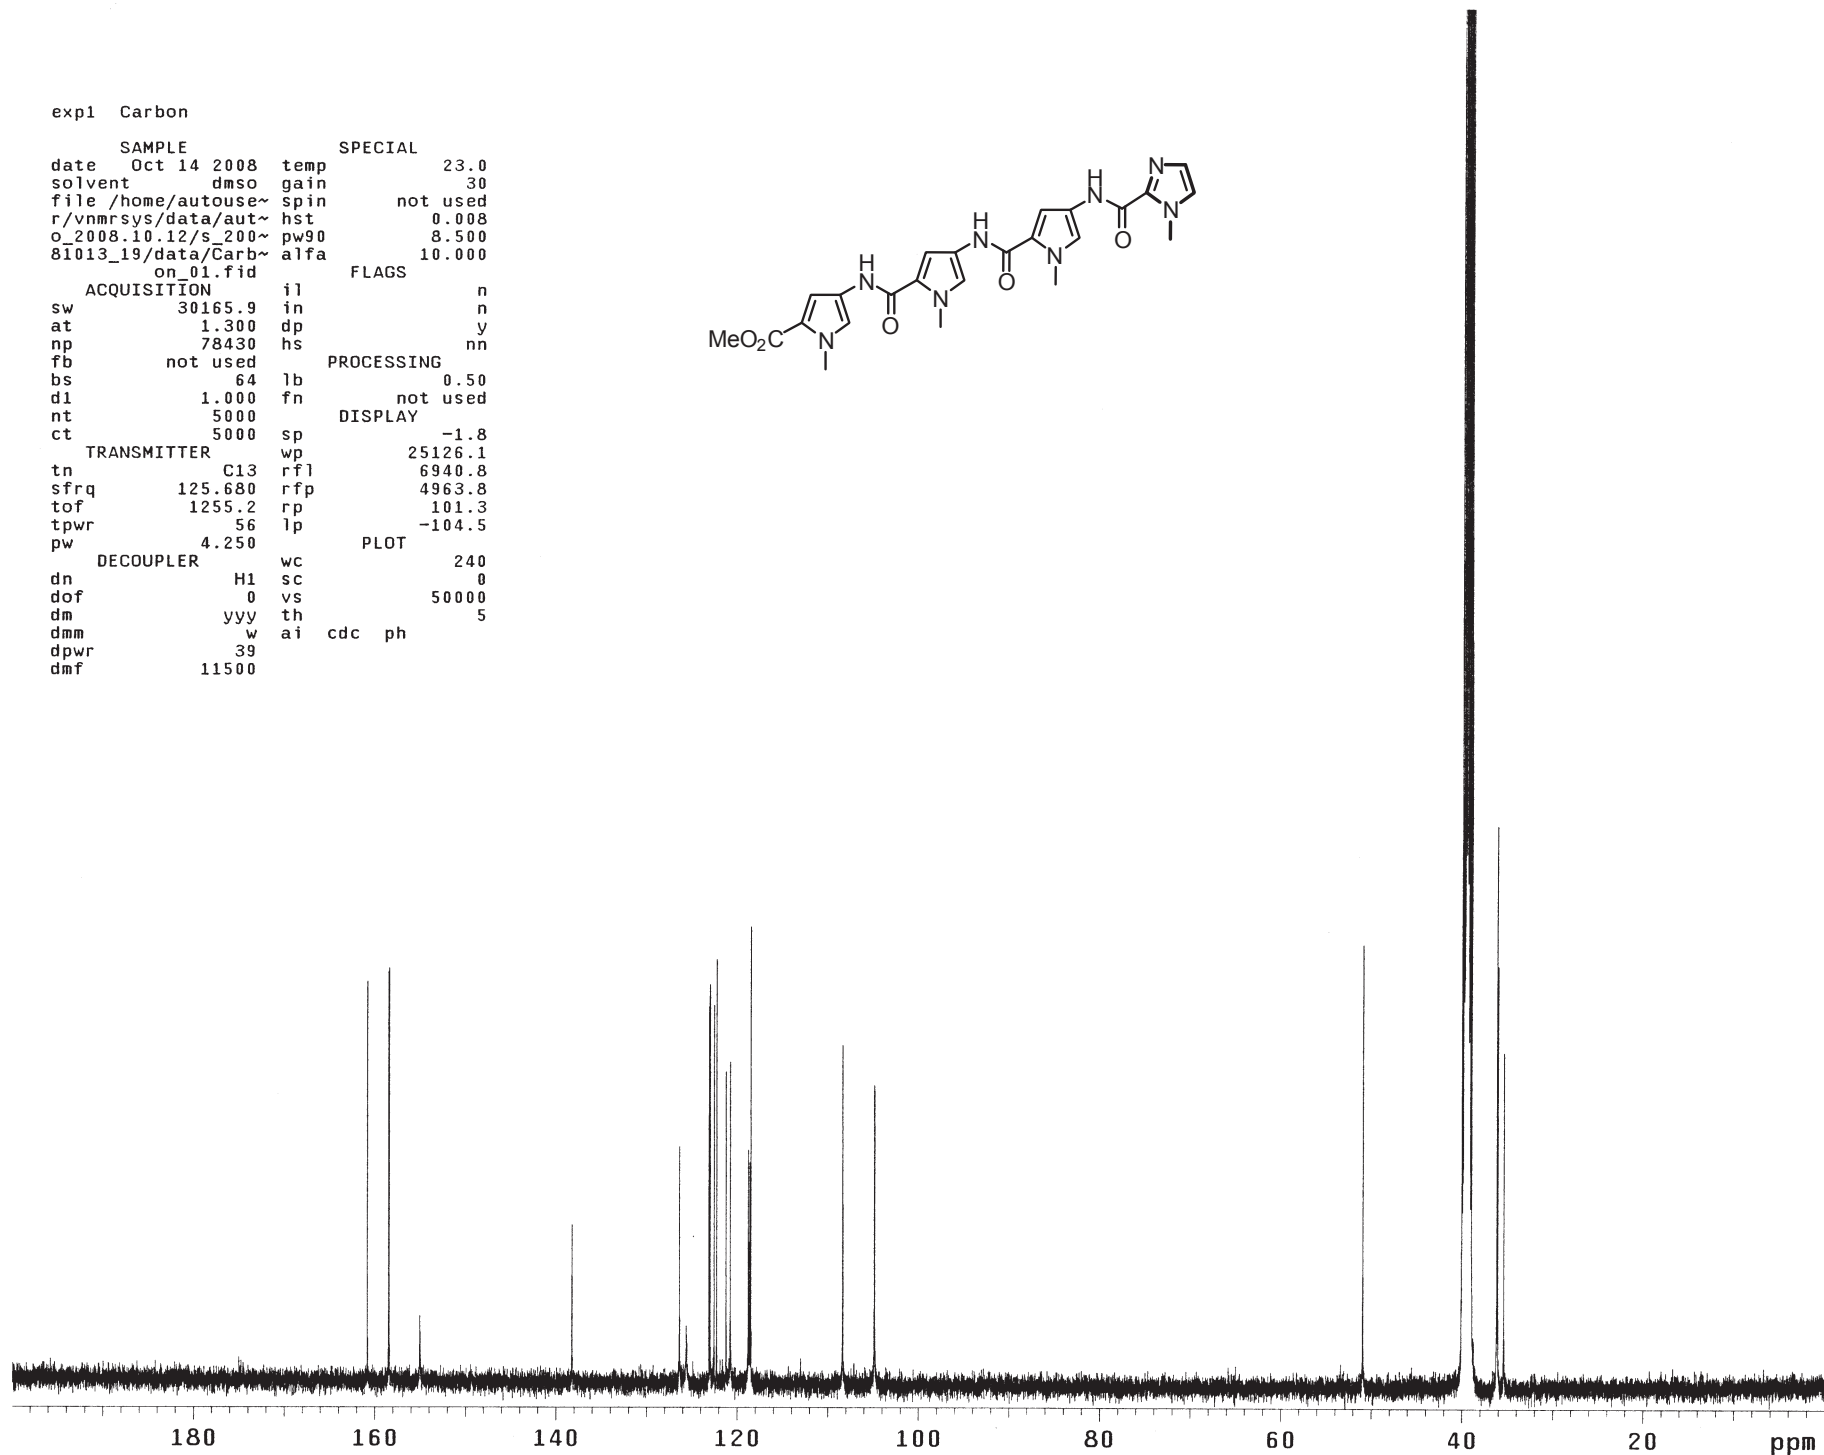

exp1 Proton

```
SAMPLE          SPECIAL
date Oct 24 2008 temp          23.0
solvent dms0 gain          not used
file /home/autouse~ spin          not used
r/vnmrSYS/data/aut~ hst          0.008
o_2008.10.22/s_200~ pw90         9.900
81023_27/data/Prot~ alfa         6.600
on_01.fid
ACQUISITION    i1          n
sw 8000.0      in          n
at 2.048      dp          y
np 32762      hs          nn
fb not used
bs 32         lb          0.20
ss 2          fn          65536
dl 1.000     DISPLAY
nt 32        sp          -3.9
ct 32        wp          5999.8
TRANSMITTER    rfl          2248.3
tn H1        rfp          1244.4
sfrq 499.772 rp          45.8
tof 499.6    lp          7.2
tpwr 61      PLOT
pw 4.950    wc          240
DECOUPLER     sc          0
dn C13       vs          100
dof 0        th          12
dm nnn       ai cdc ph
dmm c
dpwr 35
dmf 32258
```

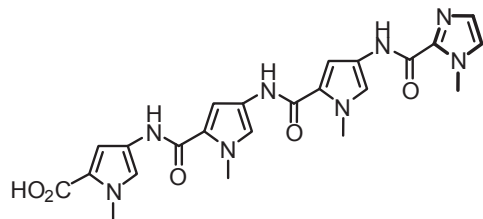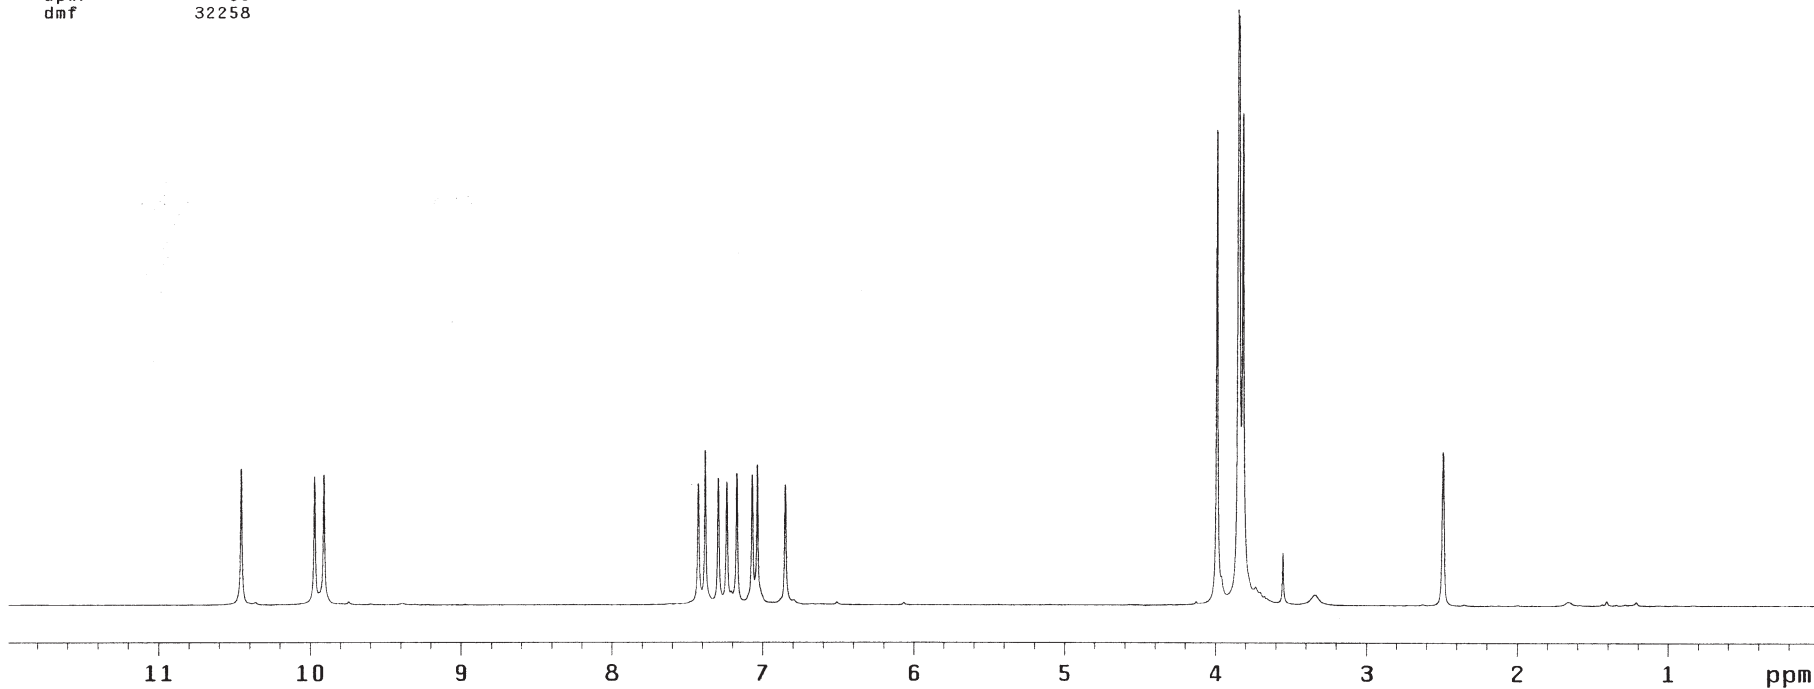

exp1 Carbon

```
SAMPLE SPECIAL
date Oct 24 2008 temp 23.0
solvent dms0 gain 30
file /home/autouse~ spin not used
r/vnmr sys/data/aut~ hst 0.008
o_2008.10.22/s_200~ pw90 8.500
8I023_27/data/Carb~ alfa 10.000
on_01.fid
ACQUISITION FLAGS
sw 30165.9 il n
at 1.300 in n
np 78430 dp y
fb not used hs nn
bs 64 lb 0.50
d1 1.000 fn not used
nt 5000 DISPLAY
ct 5000 sp 11.5
TRANSMITTER wp 25115.1
tn C13 rfl 6939.0
sfrq 125.680 rfp 4963.8
tof 1255.2 rp 98.3
tpwr 56 lp -91.8
pw 4.250 PLOT
DECOUPLER wc 240
dn H1 sc 0
dof 0 vs 50000
dm yyy th 14
dmm w ai cdc ph
dpwr 39
dmf 11500
```

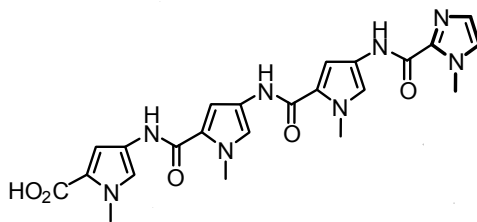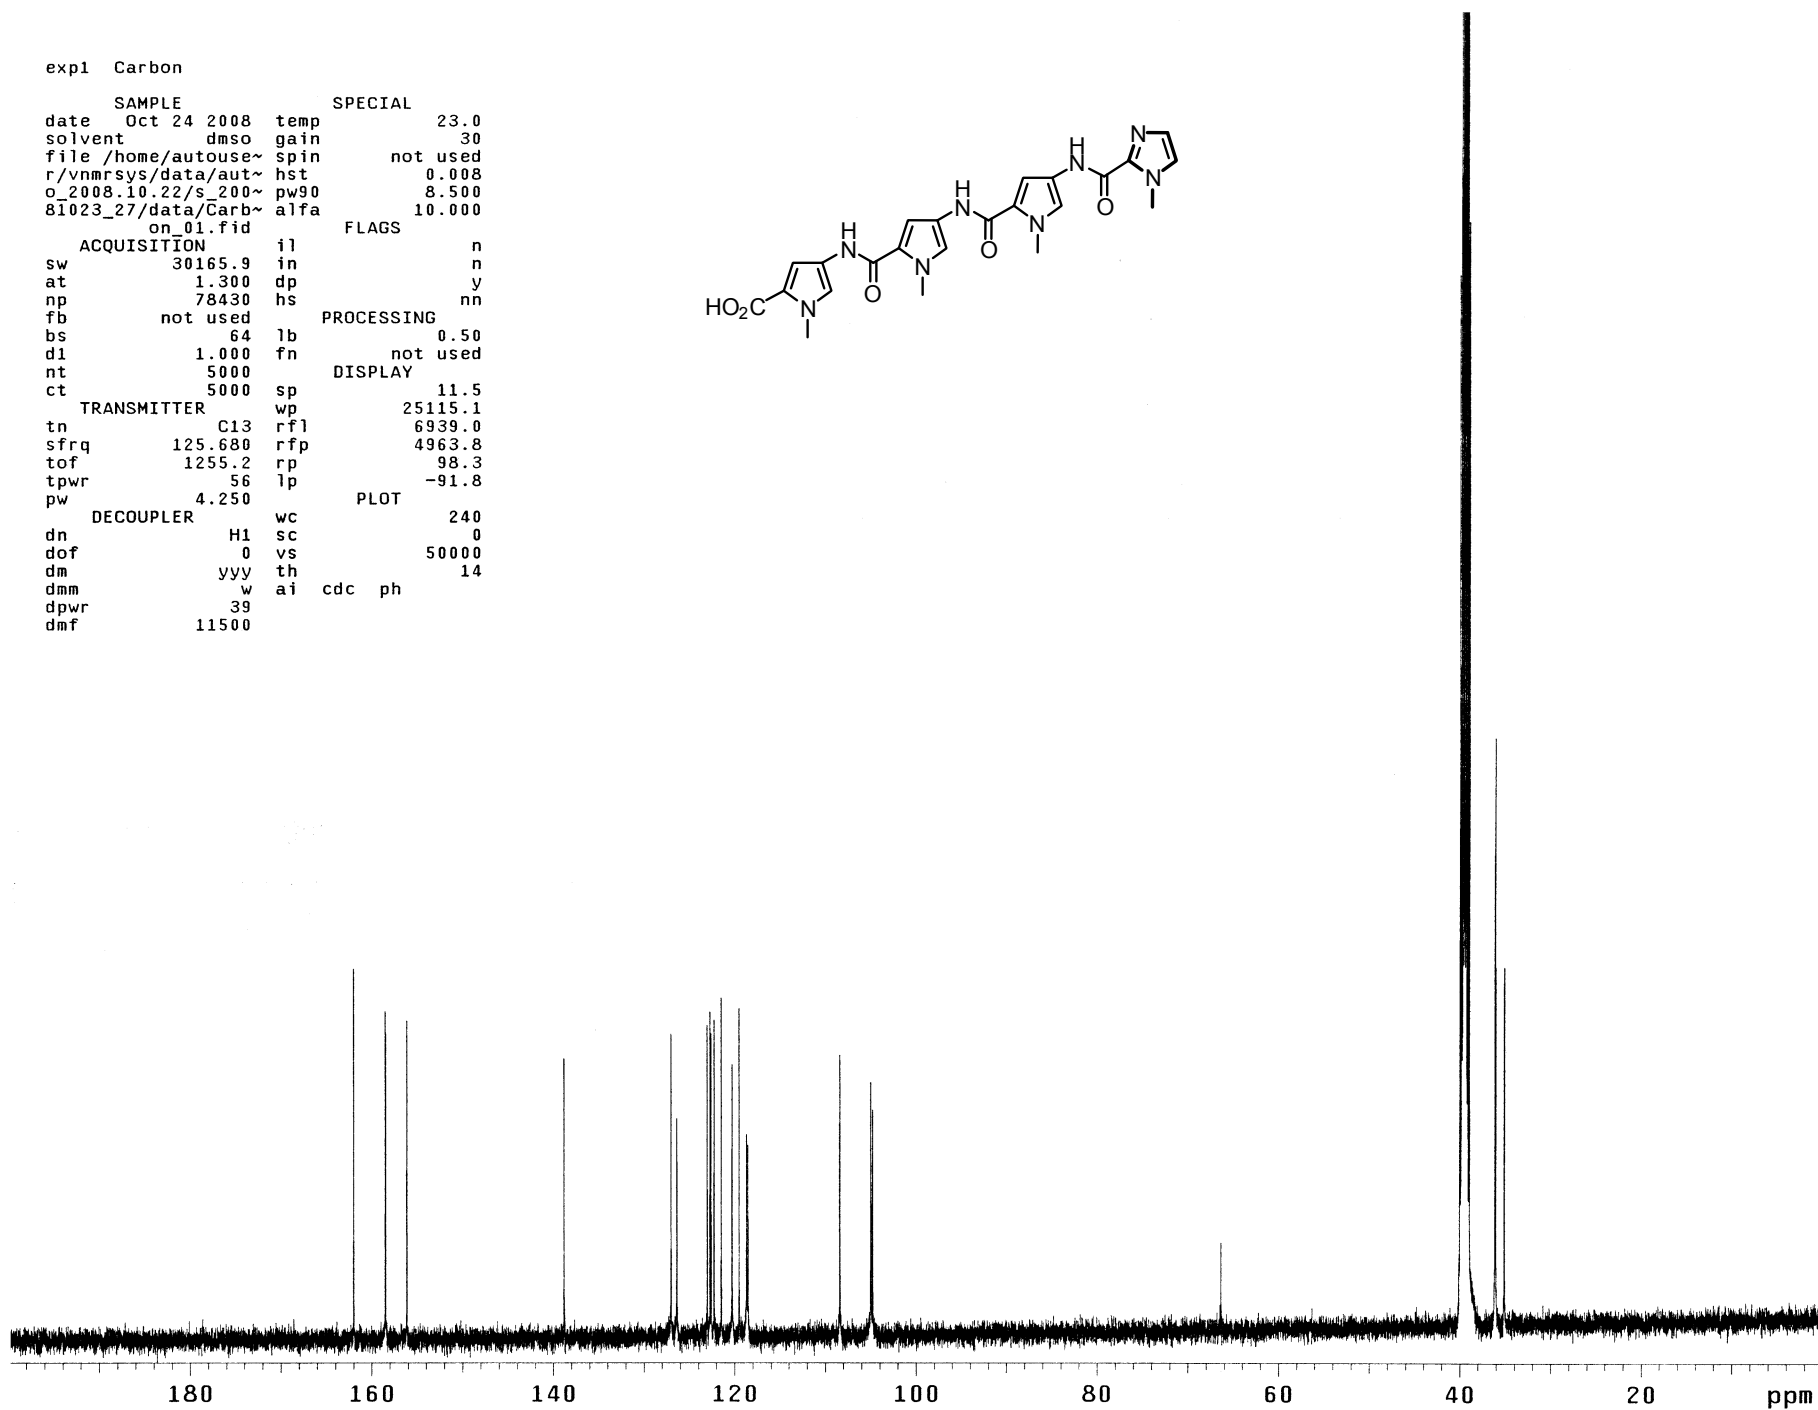

exp1 Proton

```
SAMPLE          SPECIAL
date Oct 11 2008 temp      23.0
solvent dmsd gain      not used
file /home/autouse~ spin    not used
r/vnmrsvs/data/aut~ hst     0.008
o_2008.10.08/s_200~ pw90   9.900
8l011_09/data/Prot~ alfa   6.600
on_01.fid
ACQUISITION     il        n
sw      8000.0 in        n
at      2.048 dp        y
np      32762 hs       nn
fb      not used
bs      32 lb         0.20
ss      2 fn         65536
dl      1.000
nt      64 sp        -9.2
ct      64 wp        5997.3
TRANSMITTER     rfl       2245.8
tn      H1 rfp       1244.4
sfrq    499.772 rp      37.8
tof     499.6 lp      -0.9
tpwr    61
pw     4.950 wc       240
DECOUPLER      C13 sc       0
dn      0 vs       100
dof     0 th       2
dm      nnn ai cdc ph
dmm     c
dpwr    35
dmf     32258
```

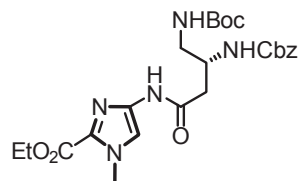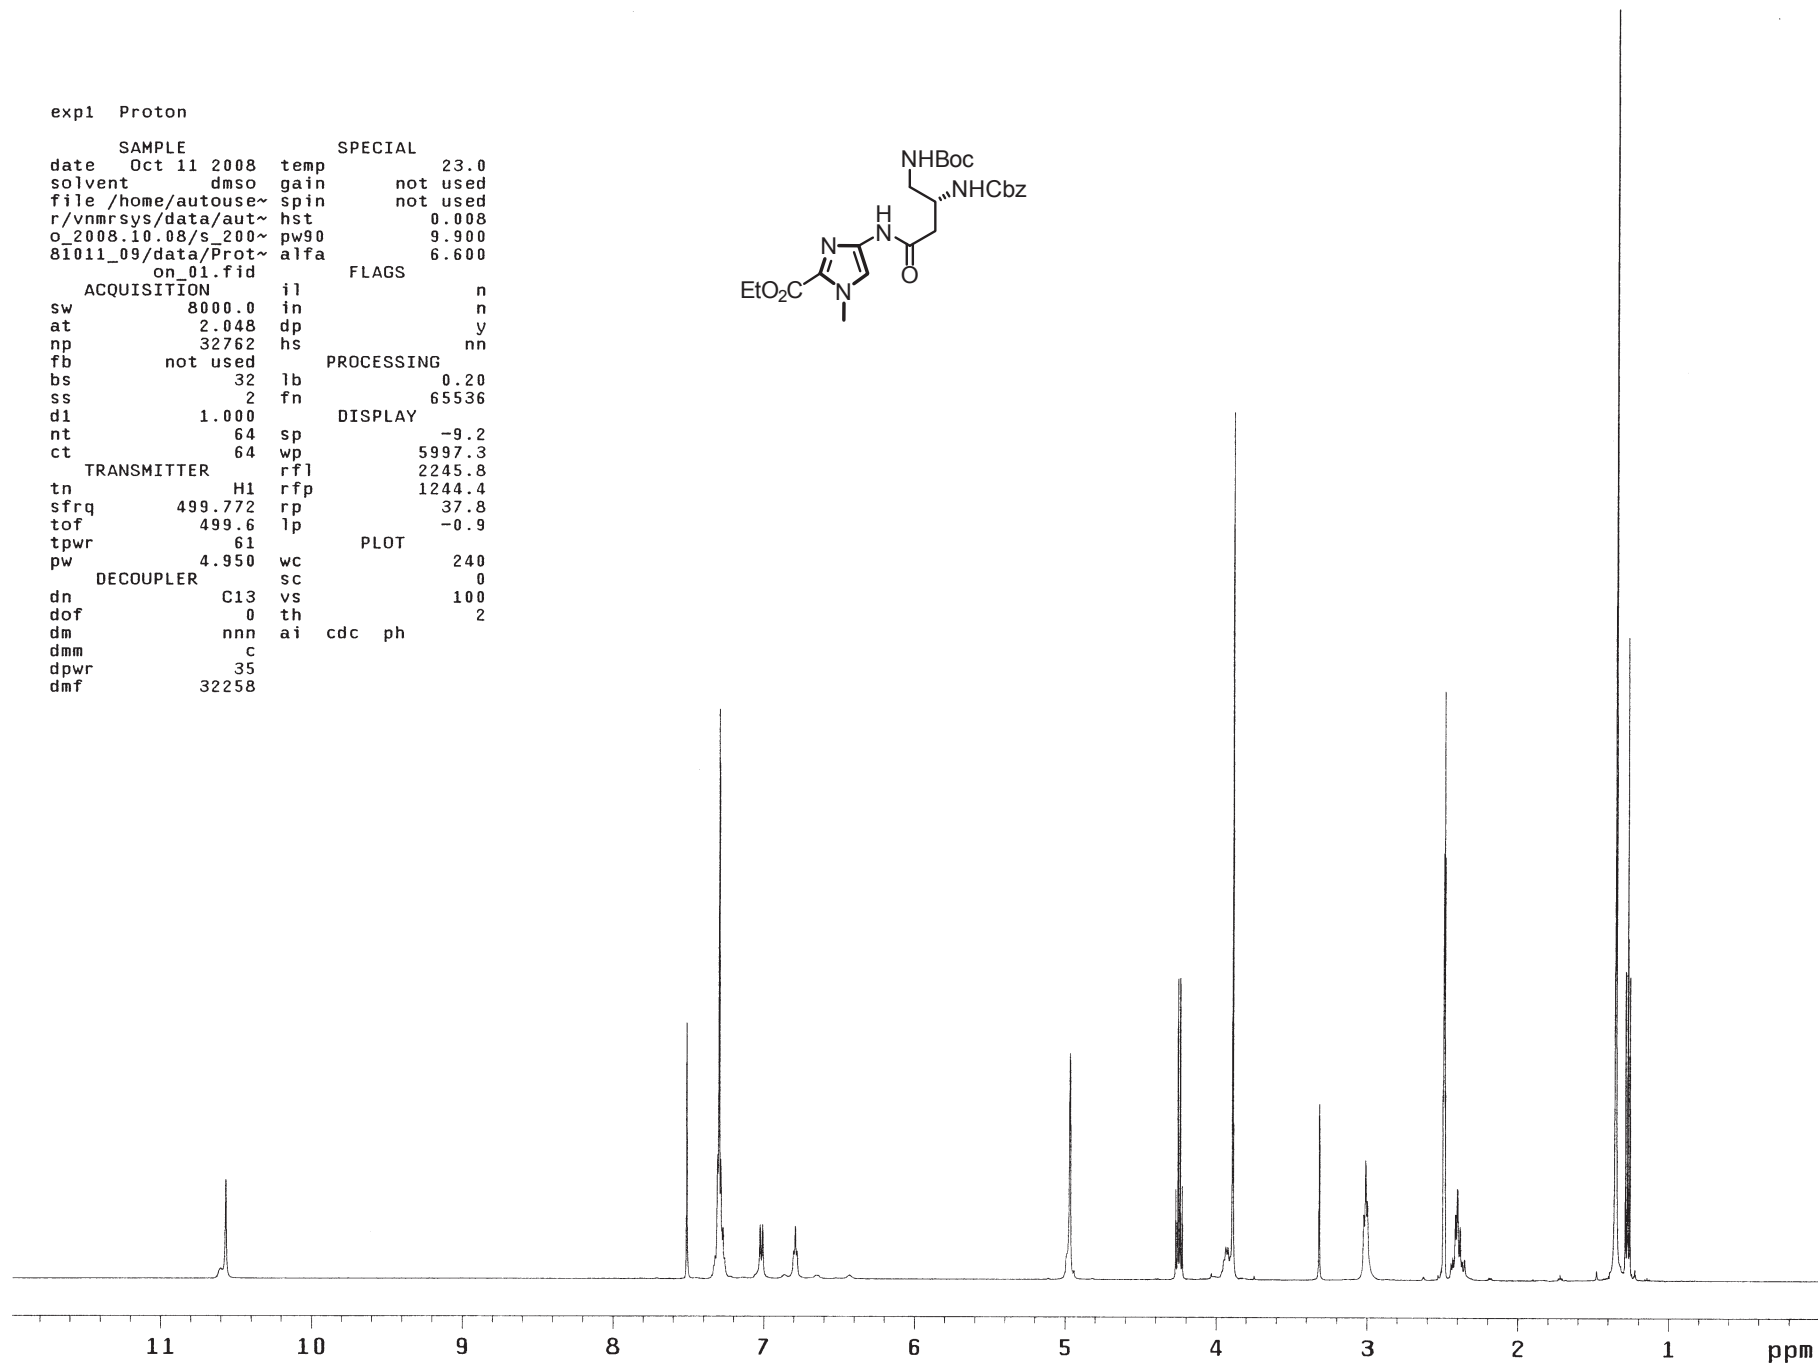



exp1 Carbon

```
SAMPLE SPECIAL
date Oct 13 2008 temp 23.0
solvent dms0 gain 30
file /home/autouse~ spin not used
r/vnmrsys/data/aut~ hst 0.008
o_2008.10.12/s_200~ pw90 8.500
81012_02/data/Carb~ alfa 10.000
on_01.fid
ACQUISITION FLAGS
sw 30165.9 in n
at 1.300 dp y
np 78430 hs nn
fb not used
bs 64 lb 0.50
d1 1.000 fn not used
nt 6000
ct 6000 sp -42.3
TRANSMITTER wp 25159.7
tn C13 rfl 6941.7
sfrq 125.680 rfp 4963.8
tof 1255.2 rp 82.9
tpwr 56 lp -50.2
pw 4.250
DECOUPLER wc 240
dn H1 sc 0
dof 0 vs 82087
dm yyy th 8
dmm w ai cdc ph
dpwr 39
dmf 11500
```

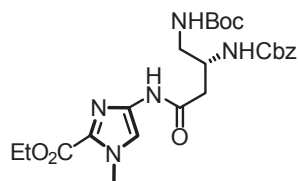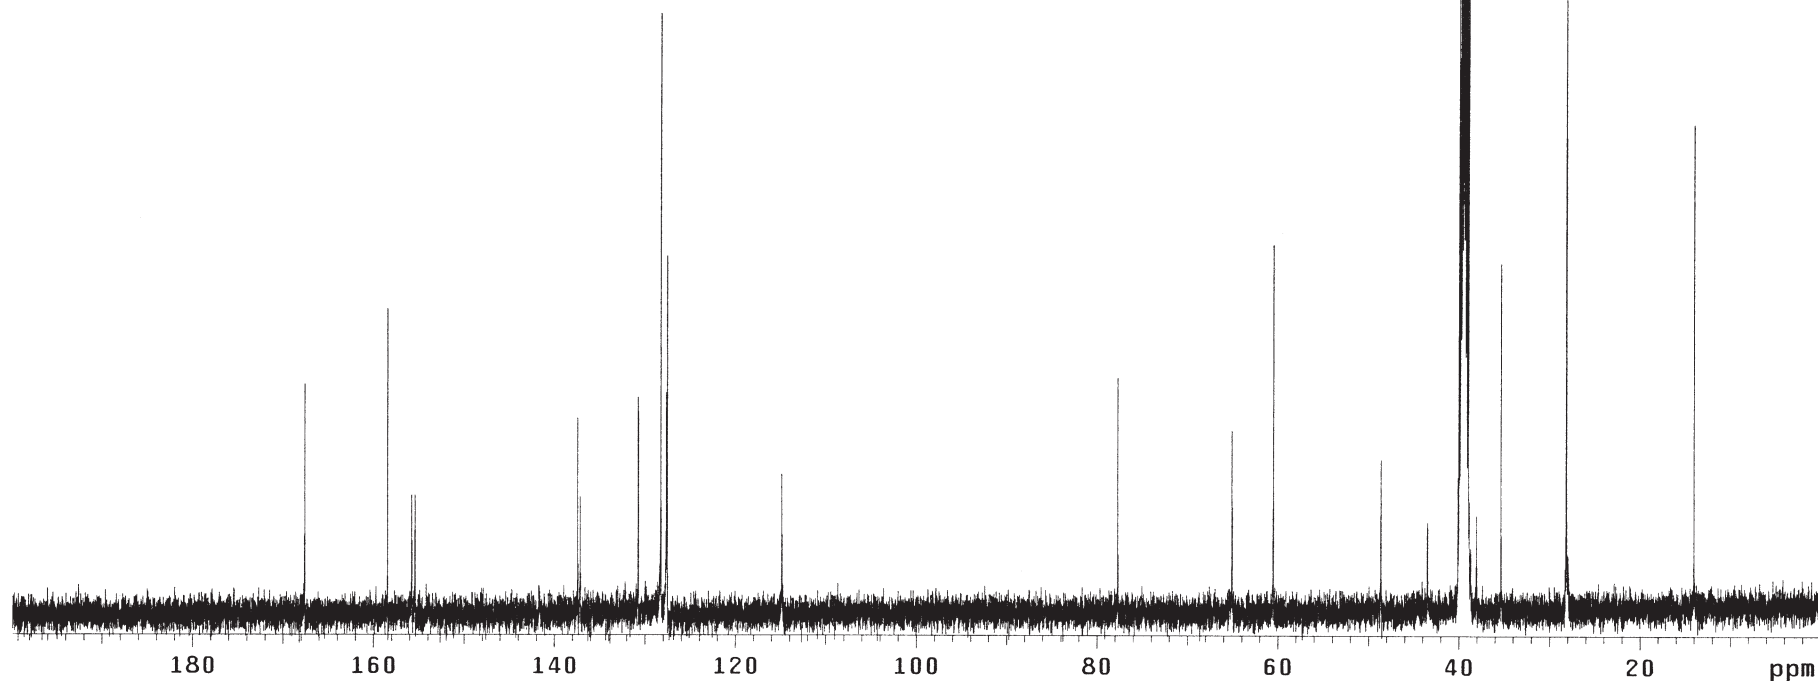

expl Proton

|             |                |            |          |
|-------------|----------------|------------|----------|
| SAMPLE      |                | SPECIAL    |          |
| date        | Oct 16 2008    | temp       | 23.0     |
| solvent     | dms0           | gain       | not used |
| file        | /home/autouse~ | spin       | not used |
| r/vnmr      | sys/data/aut~  | hst        | 0.008    |
| o_2008      | .10.12/s_200~  | pw90       | 9.900    |
| 81015_09    | /data/Prot~    | alfa       | 6.600    |
| on_01.fid   |                | FLAGS      |          |
| ACQUISITION |                | il         | n        |
| sw          | 8000.0         | in         | n        |
| at          | 2.048          | dp         | y        |
| np          | 32762          | hs         | nn       |
| fb          | not used       | PROCESSING |          |
| bs          | 32             | lb         | 0.20     |
| ss          | 2              | fn         | 65536    |
| d1          | 1.000          | DISPLAY    |          |
| nt          | 64             | sp         | -9.0     |
| ct          | 64             | wp         | 6008.5   |
| TRANSMITTER |                | rfl        | 2249.0   |
| tn          | H1             | rfl        | 1244.4   |
| sfrq        | 499.772        | rp         | 38.0     |
| tof         | 499.6          | lp         | 4.2      |
| tpwr        | 61             | PLOT       |          |
| pw          | 4.950          | wc         | 240      |
| DECOUPLER   |                | sc         | 0        |
| dn          | C13            | vs         | 100      |
| dof         | 0              | th         | 2        |
| dm          | nnn            | ai         | cdc ph   |
| dmm         | c              |            |          |
| dpwr        | 35             |            |          |
| dmf         | 32258          |            |          |

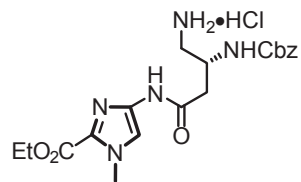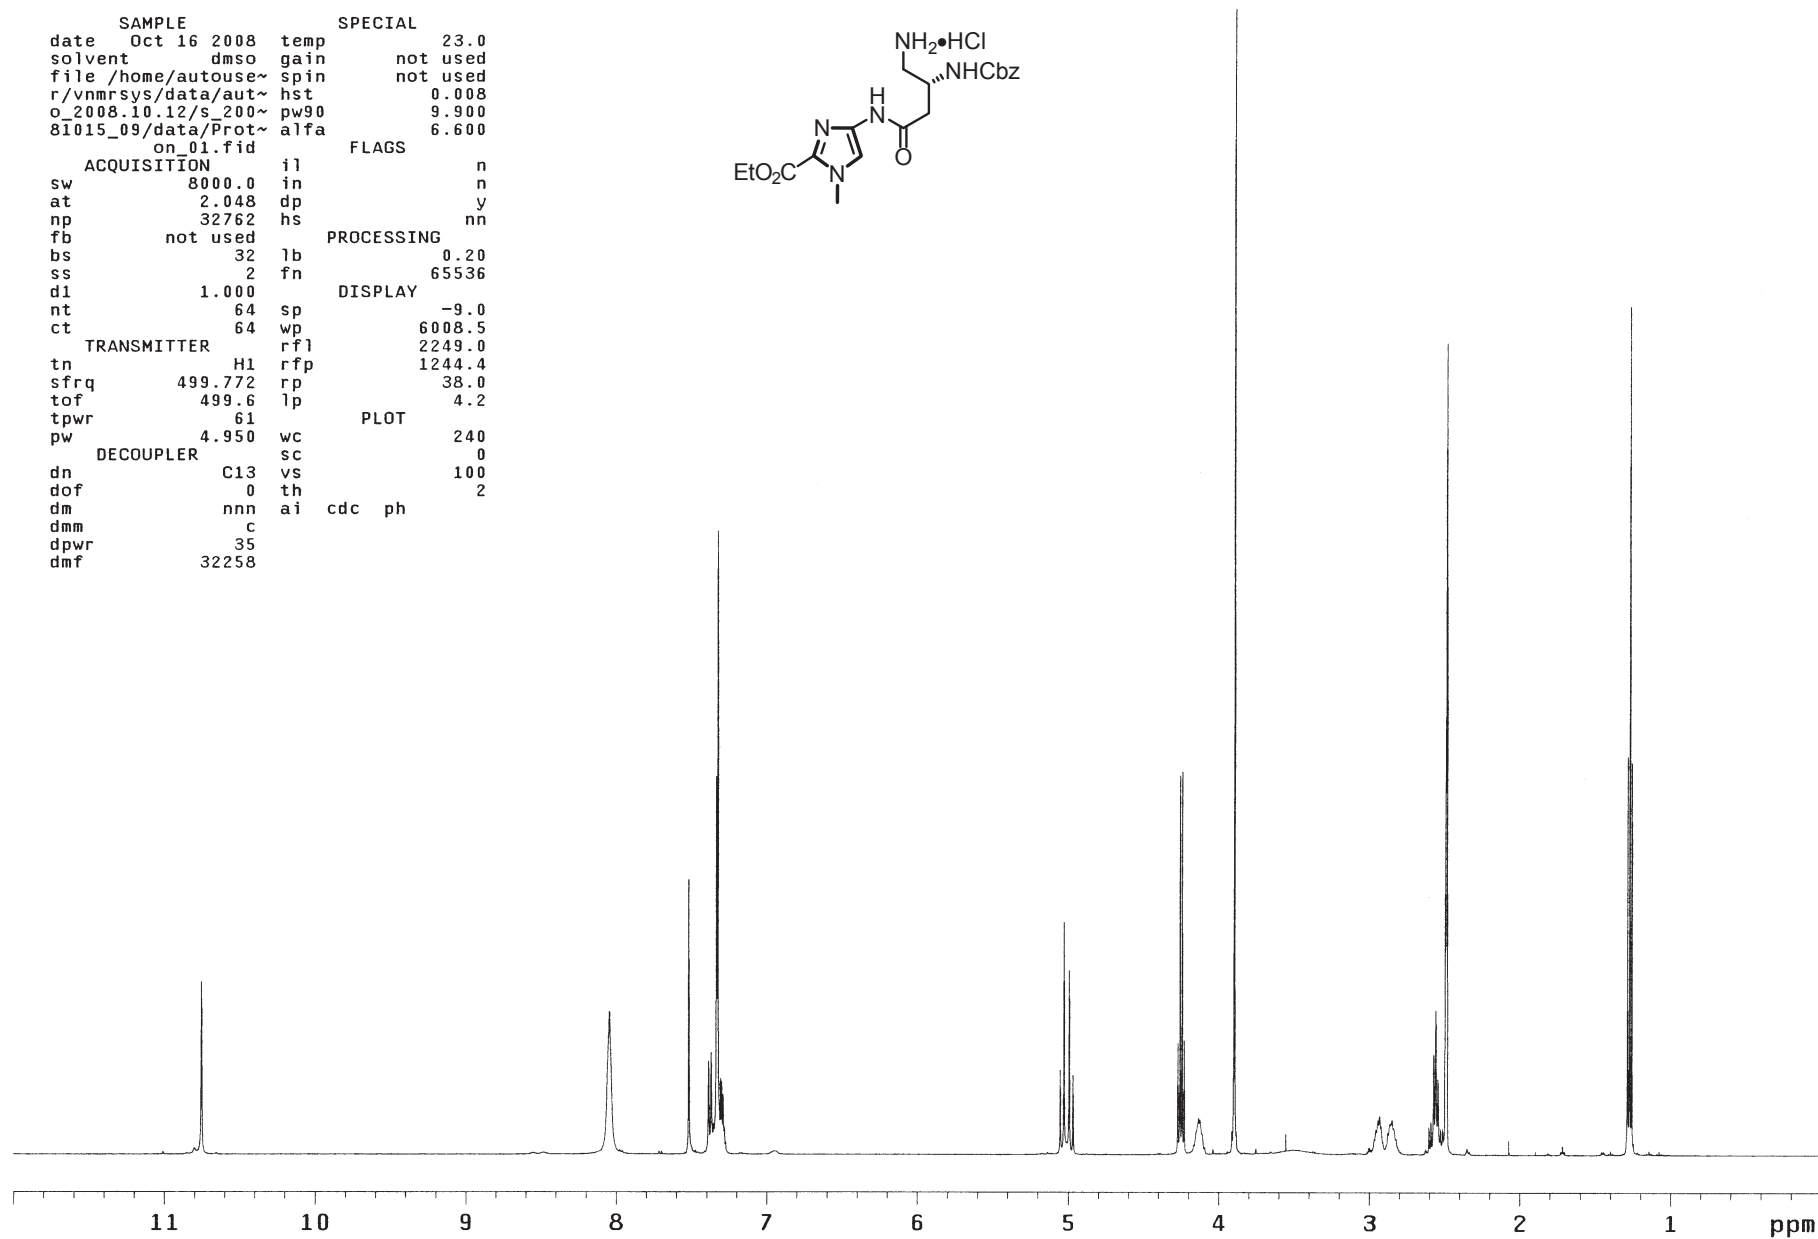

exp1 Carbon

```
SAMPLE SPECIAL
date Oct 16 2008 temp 23.0
solvent dms0 gain 30
file /home/autouse~ spin not used
r/vnmrSYS/data/aut~ hst 0.008
o_2008.10.12/s_200~ pw90 8.500
81015_09/data/Carb~ alfa 10.000
on_01.fid
ACQUISITION i1 n
sw 30165.9 in n
at 1.300 dp y
np 78430 hs nn
fb not used
bs 64 lb PROCESSING 0.50
dl 1.000 fn not used
nt 4000 DISPLAY
ct 4000 sp -50.6
TRANSMITTER wp 25181.8
tn C13 rfl 6941.7
sfrq 125.680 rfp 4963.8
tof 1255.2 rp 98.9
tpwr 56 lp -106.4
pw 4.250 PLOT
DECOUPLER wc 240
dn H1 sc 0
dof 0 vs 65100
dm yyy th 8
dmm w ai cdc ph
dpwr 39
dmf 11500
```

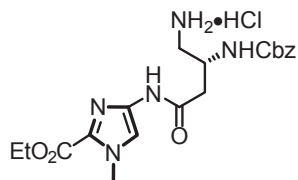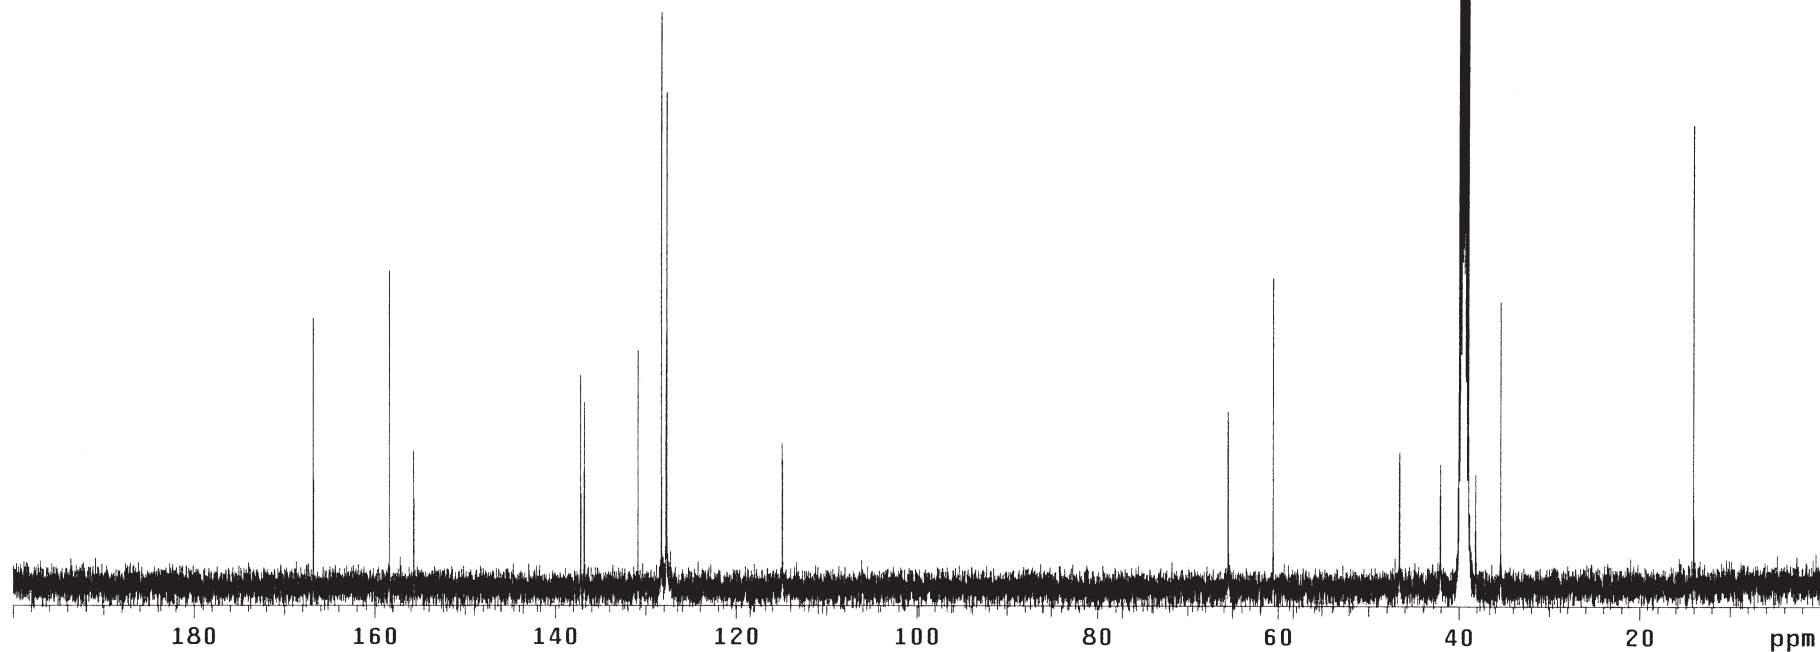

exp1 Proton

```
SAMPLE          SPECIAL
date   Oct 11 2008  temp      23.0
solvent dmsd         gain     not used
file   /home/autouse~  spin     not used
r/vnmr~ /data/aut~  hst      0.008
o_2008.10.08/s_200~  pw90    9.900
81011_10/data/Prot~  alfa    6.600
on_01.fid
ACQUISITION     i1         n
sw             8000.0     in         n
at             2.048     dp         y
np             32762     hs         nn
fb             not used
bs             32        lb         0.20
ss             2        fn         65536
dl             1.000
nt             64        sp         -9.2
ct             64        wp         6006.6
TRANSMITTER     rfl         2245.8
tn             H1        rfp         1244.4
sfrq          499.772    rp         40.9
tof           499.6     lp         -5.6
tpwr          61
pw            4.950
DECOUPLER       wc         240
dn             C13       sc         0
dof            0        vs         225
dm             nnn       th         4
dmm            c        ai         cdc
dpwr           35        ph
dmf           32258
```

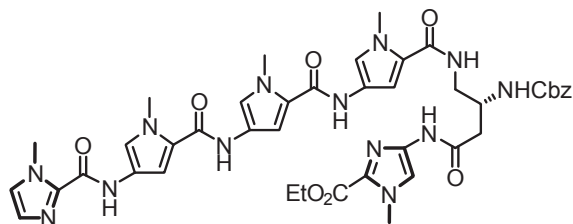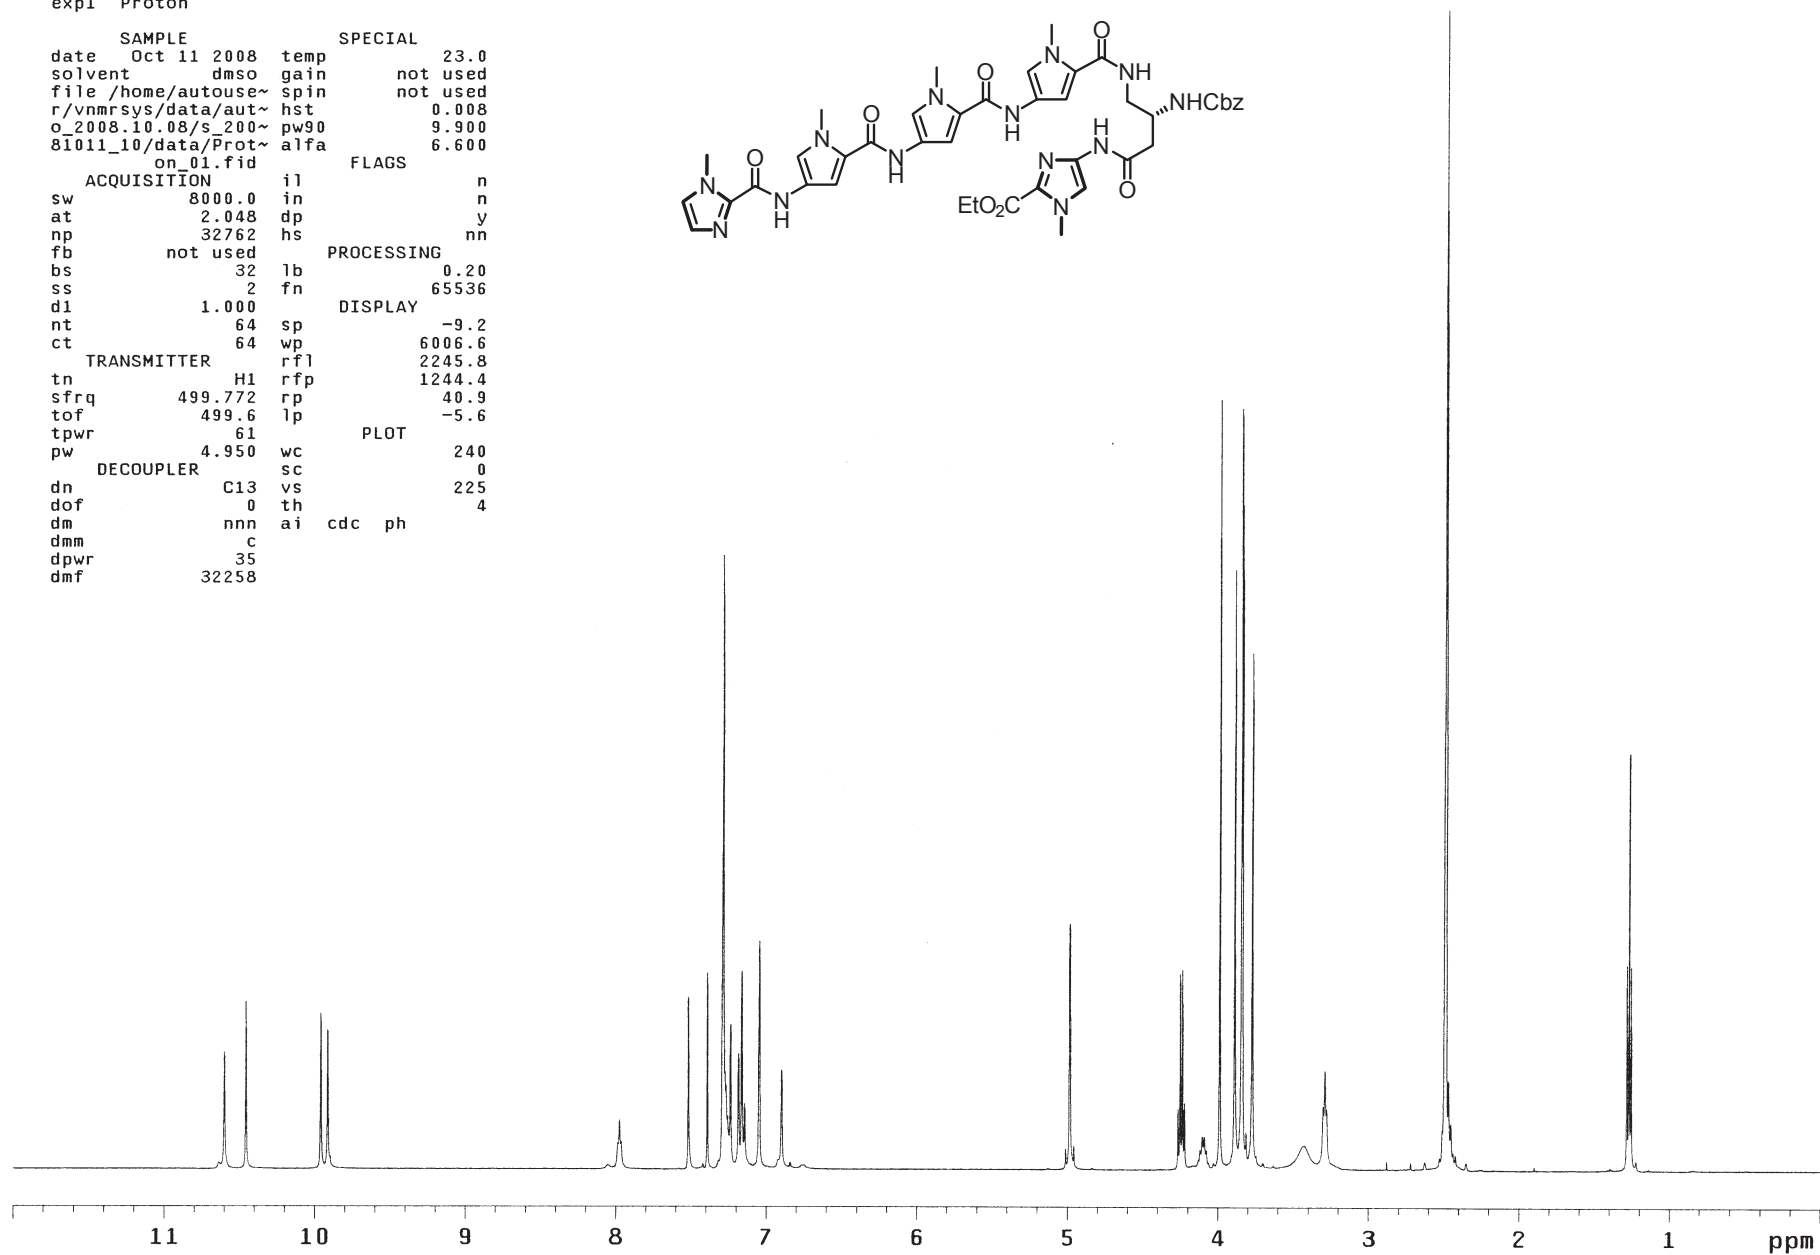

exp1 Carbon

```
SAMPLE SPECIAL
date Oct 12 2008 temp 23.0
solvent dms0 gain 30
file /home/autouse~ spin not used
r/vnmrSYS/data/aut~ hst 0.008
o_2008.10.08/s_200~ pw90 8.500
81011_15/data/Carb~ alfa 10.000
on_01.fid
ACQUISITION FLAGS
sw 30165.9 in n
at 1.300 dp y
np 78430 hs nn
fb not used
bs 64 lb 0.50
d1 1.000 fn not used
nt 4000
ct 4000 sp -1974.6
TRANSMITTER wp 30165.5
tn C13 rfl 6939.0
sfrq 125.680 rfp 4963.8
tof 1255.2 rp 100.0
tpwr 56 lp -107.6
pw 4.250
DECOUPLER PLOT
dn H1 wc 240
dof 0 sc 0
dm yyy th 50000
dmm w ai cdc ph 7
dpwr 39
dmf 11500
```

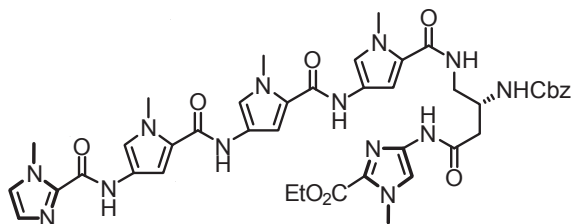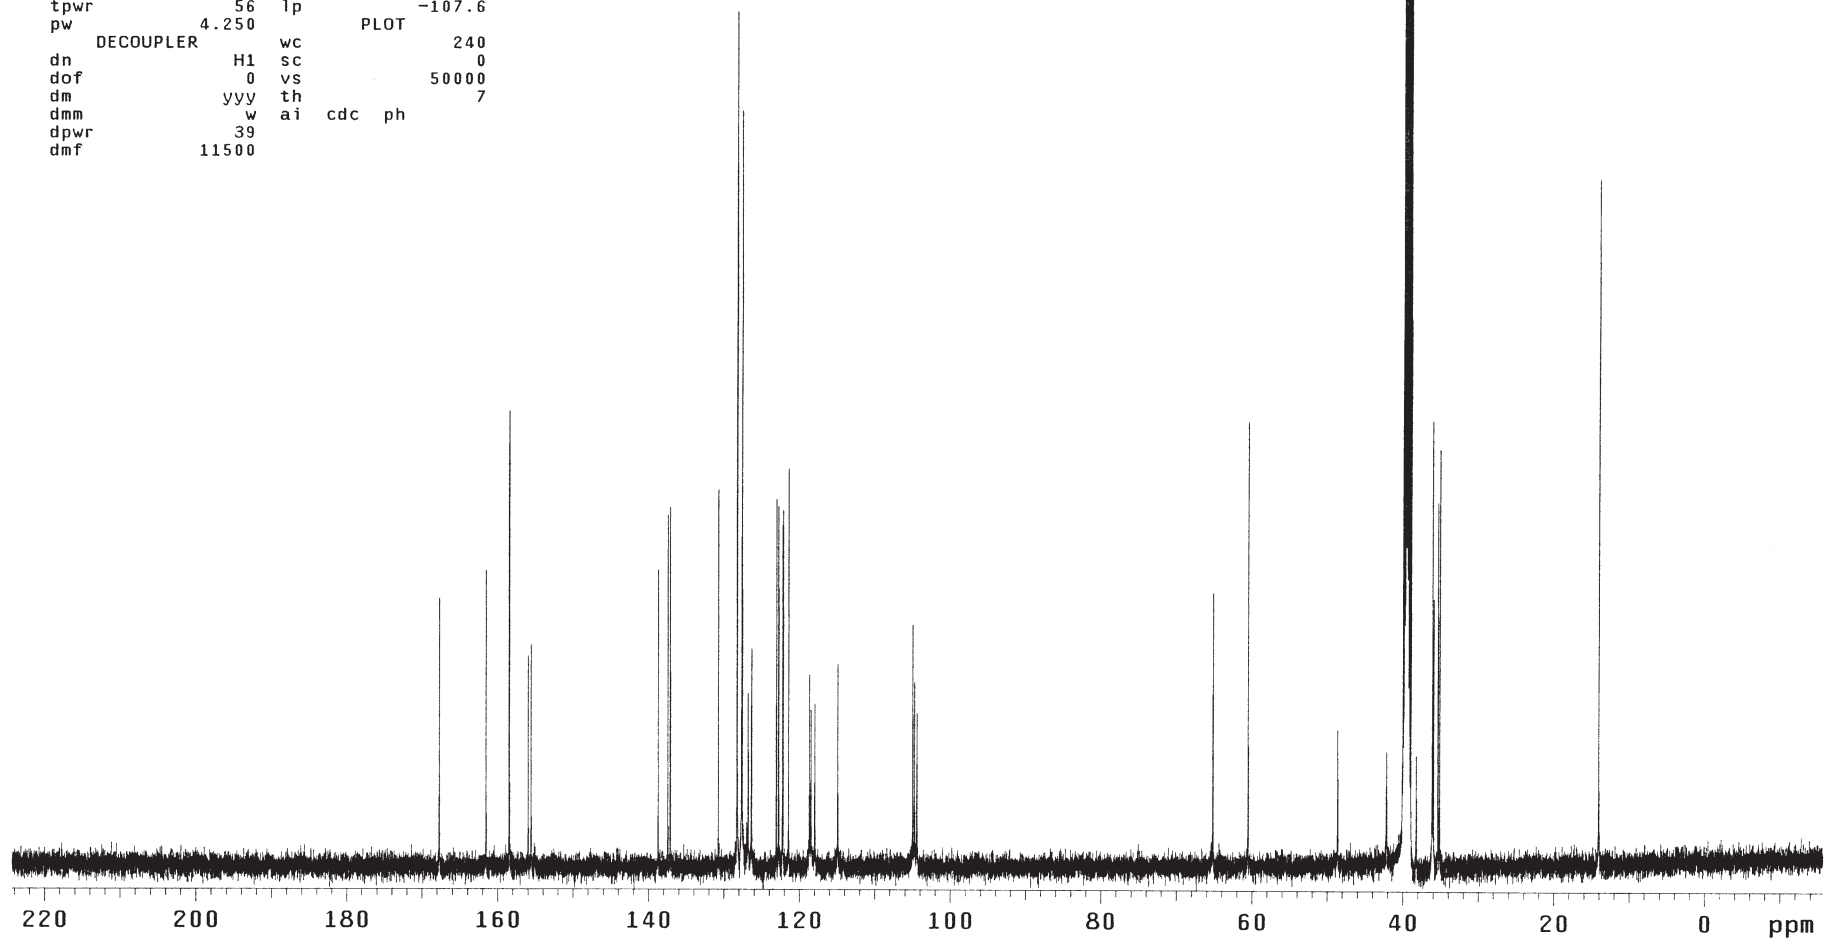

exp1 Proton

| SAMPLE      |                | SPECIAL    |          |
|-------------|----------------|------------|----------|
| date        | Oct 11 2008    | temp       | 23.0     |
| solvent     | dms0           | gain       | not used |
| file        | /home/autouse~ | spin       | not used |
| r/vnmr      | sys/data/aut~  | hst        | 0.008    |
| o_2008      | 10.08/s_200~   | pw90       | 9.900    |
| 8I011_11    | /data/Prot~    | alfa       | 6.600    |
| on_01.fid   |                | FLAGS      |          |
| ACQUISITION |                | il         | n        |
| sw          | 8000.0         | in         | n        |
| at          | 2.048          | dp         | y        |
| np          | 32762          | hs         | nn       |
| fb          | not used       | PROCESSING |          |
| bs          | 32             | lb         | 0.20     |
| ss          | 2              | fn         | 65536    |
| d1          | 1.000          | DISPLAY    |          |
| nt          | 64             | sp         | -9.5     |
| ct          | 64             | wp         | 6006.6   |
| TRANSMITTER |                | rfl        | 2246.1   |
| tn          | H1             | rfp        | 1244.4   |
| sfrq        | 499.772        | rp         | 41.8     |
| tof         | 499.6          | lp         | -5.2     |
| tpwr        | 61             | PLOT       |          |
| pw          | 4.950          | wc         | 240      |
| DECOUPLER   |                | sc         | 0        |
| dn          | C13            | vs         | 150      |
| dof         | 0              | th         | 1        |
| dm          | nnn            | ai         | cdc ph   |
| dmm         | c              |            |          |
| dpwr        | 35             |            |          |
| dmf         | 32258          |            |          |

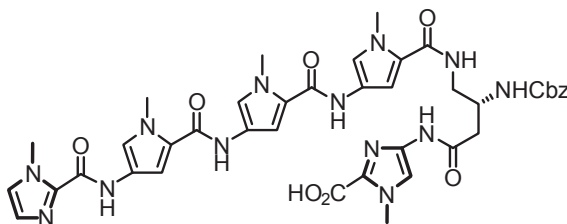



exp1 Proton

| SAMPLE      |                | SPECIAL    |          |
|-------------|----------------|------------|----------|
| date        | Nov 3 2008     | temp       | 23.0     |
| solvent     | dms            | gain       | not used |
| file        | /home/autouse~ | spin       | 20       |
| r/vnmr      | sys/data/aut~  | hst        | 0.008    |
| o_2008      | .10.31/s_200~  | pw90       | 9.900    |
| 81102_14    | /data/Prot~    | alfa       | 6.600    |
| on_01       | .fid           | FLAGS      |          |
| ACQUISITION |                | il         | n        |
| sw          | 8000.0         | in         | n        |
| at          | 2.048          | dp         | y        |
| np          | 32762          | hs         | nn       |
| fb          | not used       | PROCESSING |          |
| bs          | 32             | lb         | 0.20     |
| ss          | 2              | fn         | 65536    |
| d1          | 1.000          | DISPLAY    |          |
| nt          | 64             | sp         | -8.0     |
| ct          | 64             | wp         | 6008.5   |
| TRANSMITTER |                | rfl        | 2248.0   |
| tn          | H1             | rfl        | 1244.4   |
| sfrq        | 499.772        | rp         | 34.1     |
| tof         | 499.6          | lp         | 12.9     |
| tpwr        | 61             | PLOT       |          |
| pw          | 4.950          | wc         | 240      |
| DECOUPLER   |                | sc         | 0        |
| dn          | C13            | vs         | 150      |
| dof         | 0              | th         | 4        |
| dm          | nnn            | ai         | cdc ph   |
| dmm         | c              |            |          |
| dpwr        | 35             |            |          |
| dmf         | 32258          |            |          |

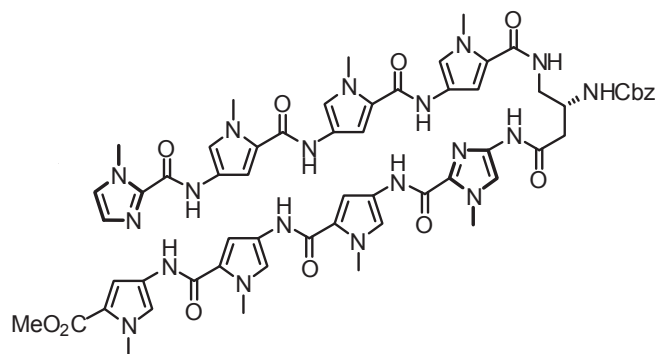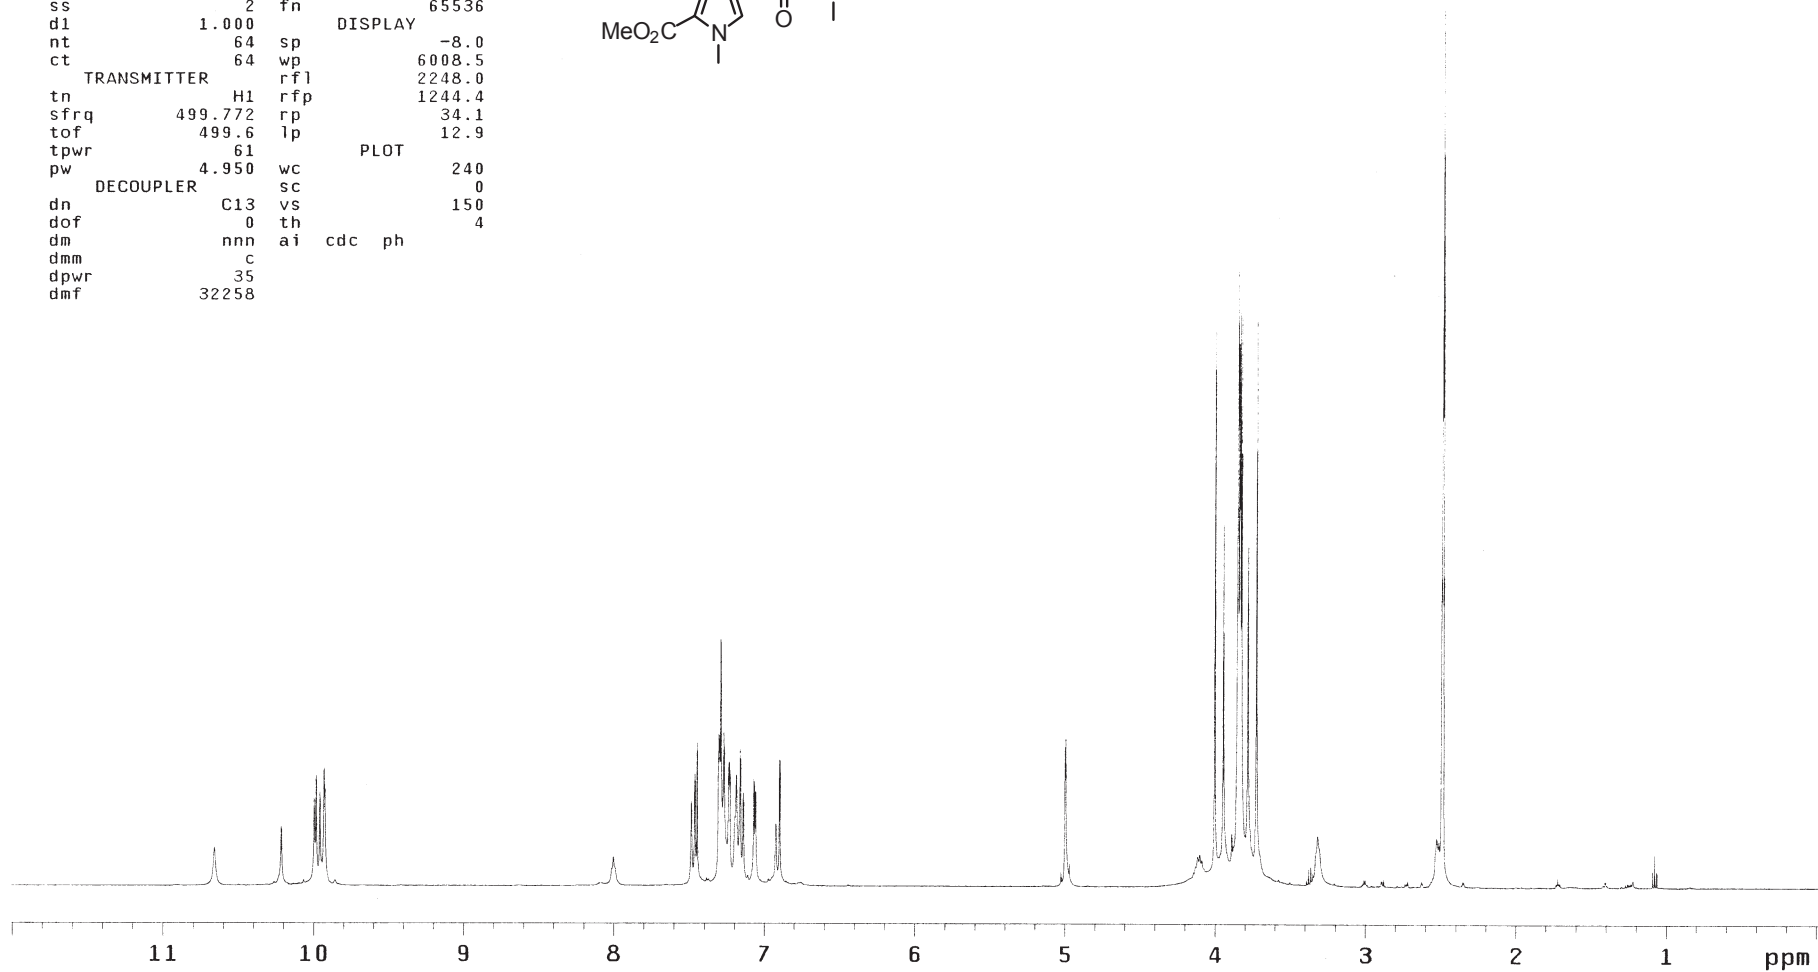





exp1 Proton

| SAMPLE   |                | SPECIAL |          |
|----------|----------------|---------|----------|
| date     | Nov 29 2008    | temp    | 23.0     |
| solvent  | dms            | gain    | not used |
| file     | /home/autouse~ | spin    | 20       |
| r/vnmr   | sys/data/aut~  | hst     | 0.008    |
| o_2008   | .11.24/s_200~  | pw90    | 9.900    |
| 81128_13 | data/Prot~     | alfa    | 6.600    |
| on_01    | .fid           | FLAGS   |          |
| sw       | 8000.0         | il      | n        |
| at       | 2.048          | in      | n        |
| np       | 32762          | dp      | y        |
| fb       | not used       | hs      | nn       |
| bs       | 32             | lb      | 0.20     |
| ss       | 2              | fn      | 65536    |
| d1       | 1.000          | DISPLAY |          |
| nt       | 64             | sp      | 3.0      |
| ct       | 64             | wp      | 5986.1   |
| tn       | H1             | rfl     | 2248.3   |
| sfrq     | 499.772        | rfp     | 1244.4   |
| tof      | 499.6          | rp      | 145.9    |
| tpwr     | 61             | lp      | -20.4    |
| pw       | 4.950          | PLOT    |          |
| dn       | C13            | wc      | 240      |
| dof      | 0              | sc      | 0        |
| dm       | nnn            | vs      | 246      |
| dmm      | c              | th      | 3        |
| dpwr     | 35             | ai      | cdc ph   |
| dmf      | 32258          |         |          |

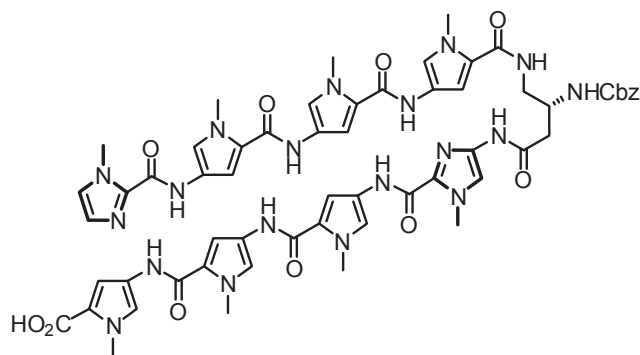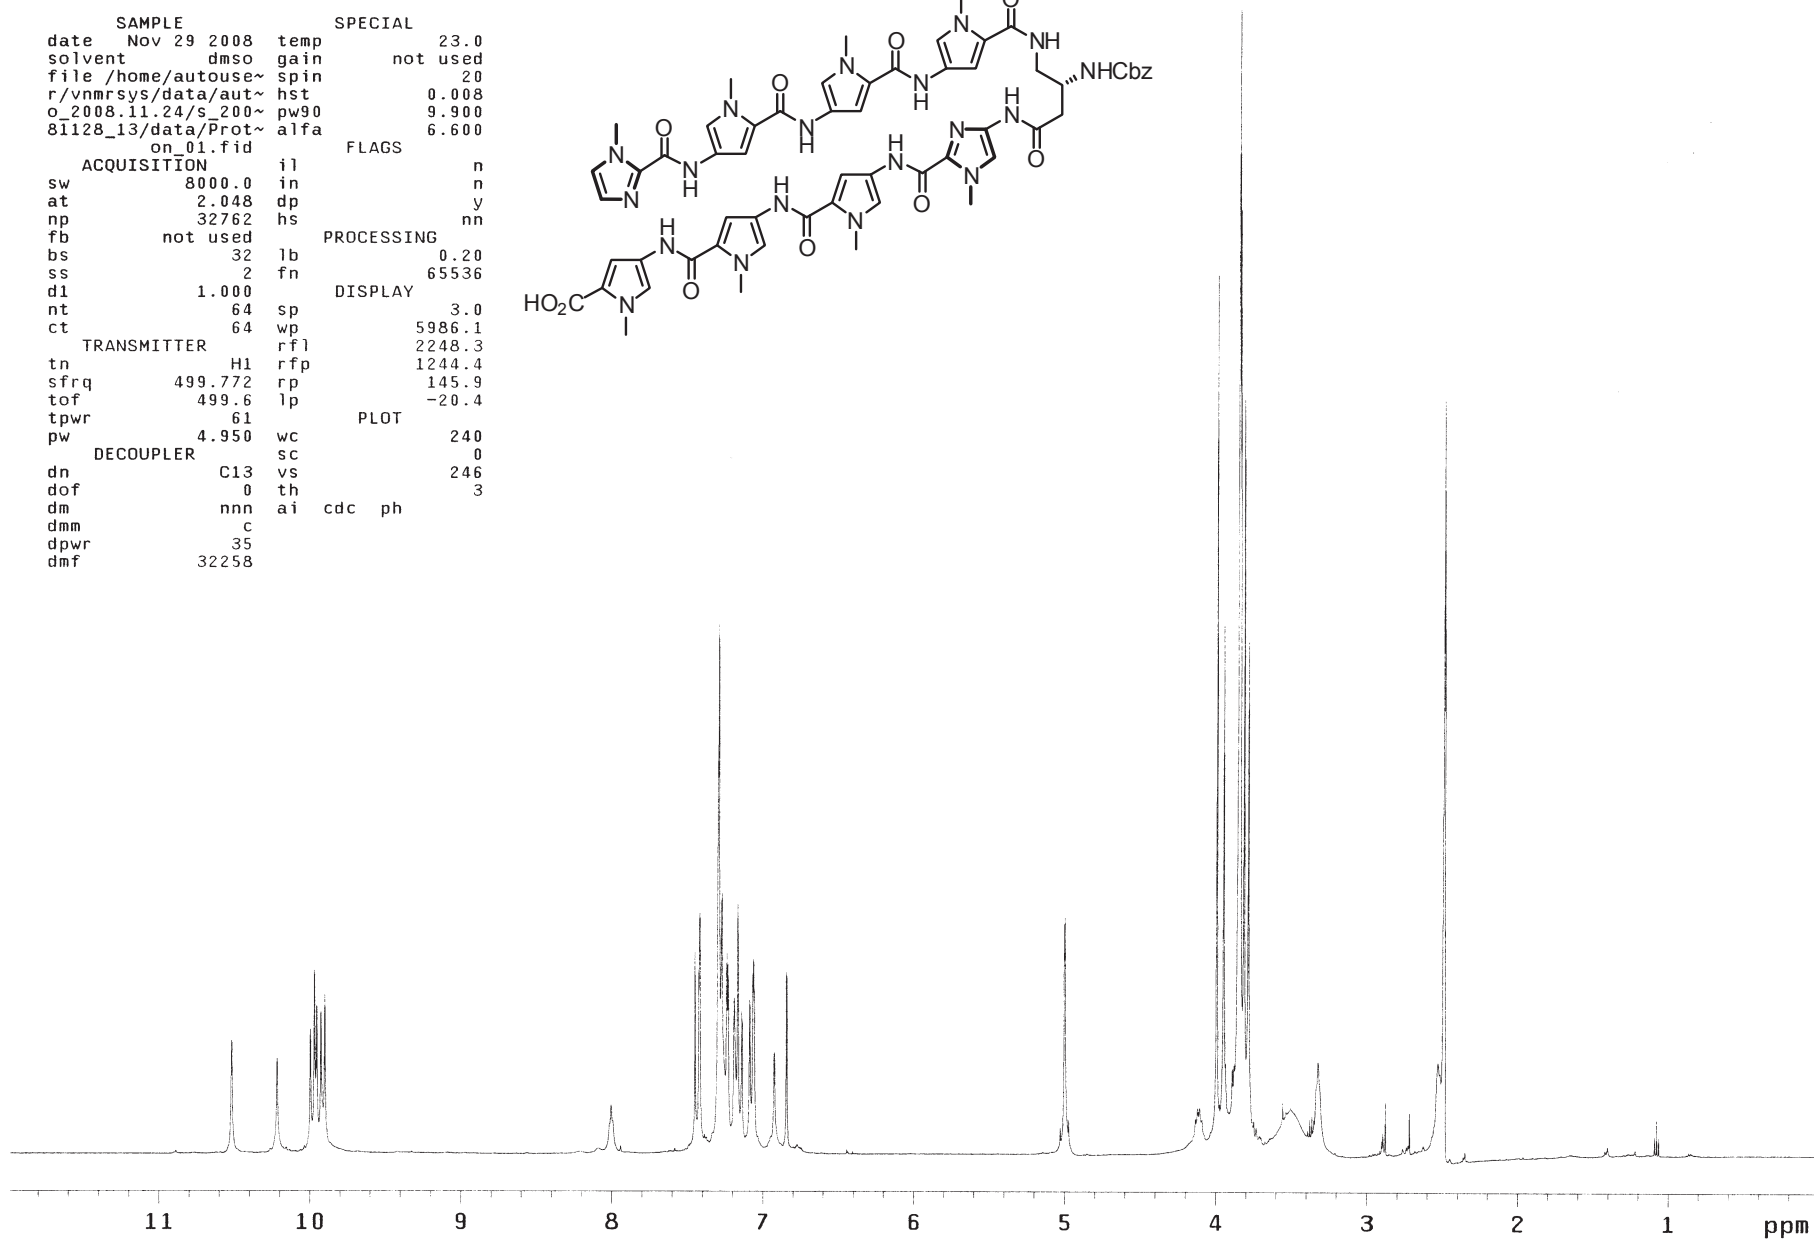



exp1 Proton

```
SAMPLE          SPECIAL
date Nov 30 2008 temp      23.0
solvent dms0 gain      not used
file /home/autouse~ spin      20
r/vnmrSYS/data/aut~ hst      0.008
O_2008.11.24/s_200~ pw90    9.900
81129_01/data/Prot~ alfa    6.600
on_01.fid
ACQUISITION    il          n
sw      8000.0 in          n
at      2.048 dp          y
np      32762 hs         nn
fb      not used
bs      32 lb          0.20
ss      2 fn          65536
d1      1.000
nt      64 sp         -13.1
ct      64 wp          6010.7
TRANSMITTER    rfl          2247.8
tn      H1 rfp          1244.4
sfrq     499.772 rp          122.6
tof      499.6 lp          10.3
tpwr     61
pw      4.950 wc          240
DECOUPLER     C13 sc          0
dn      0 vs          55
dof     0 th          1
dm      nnn ai cdc ph
dmm     c
dpwr    35
dmf     32258
```

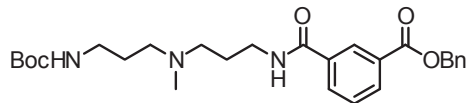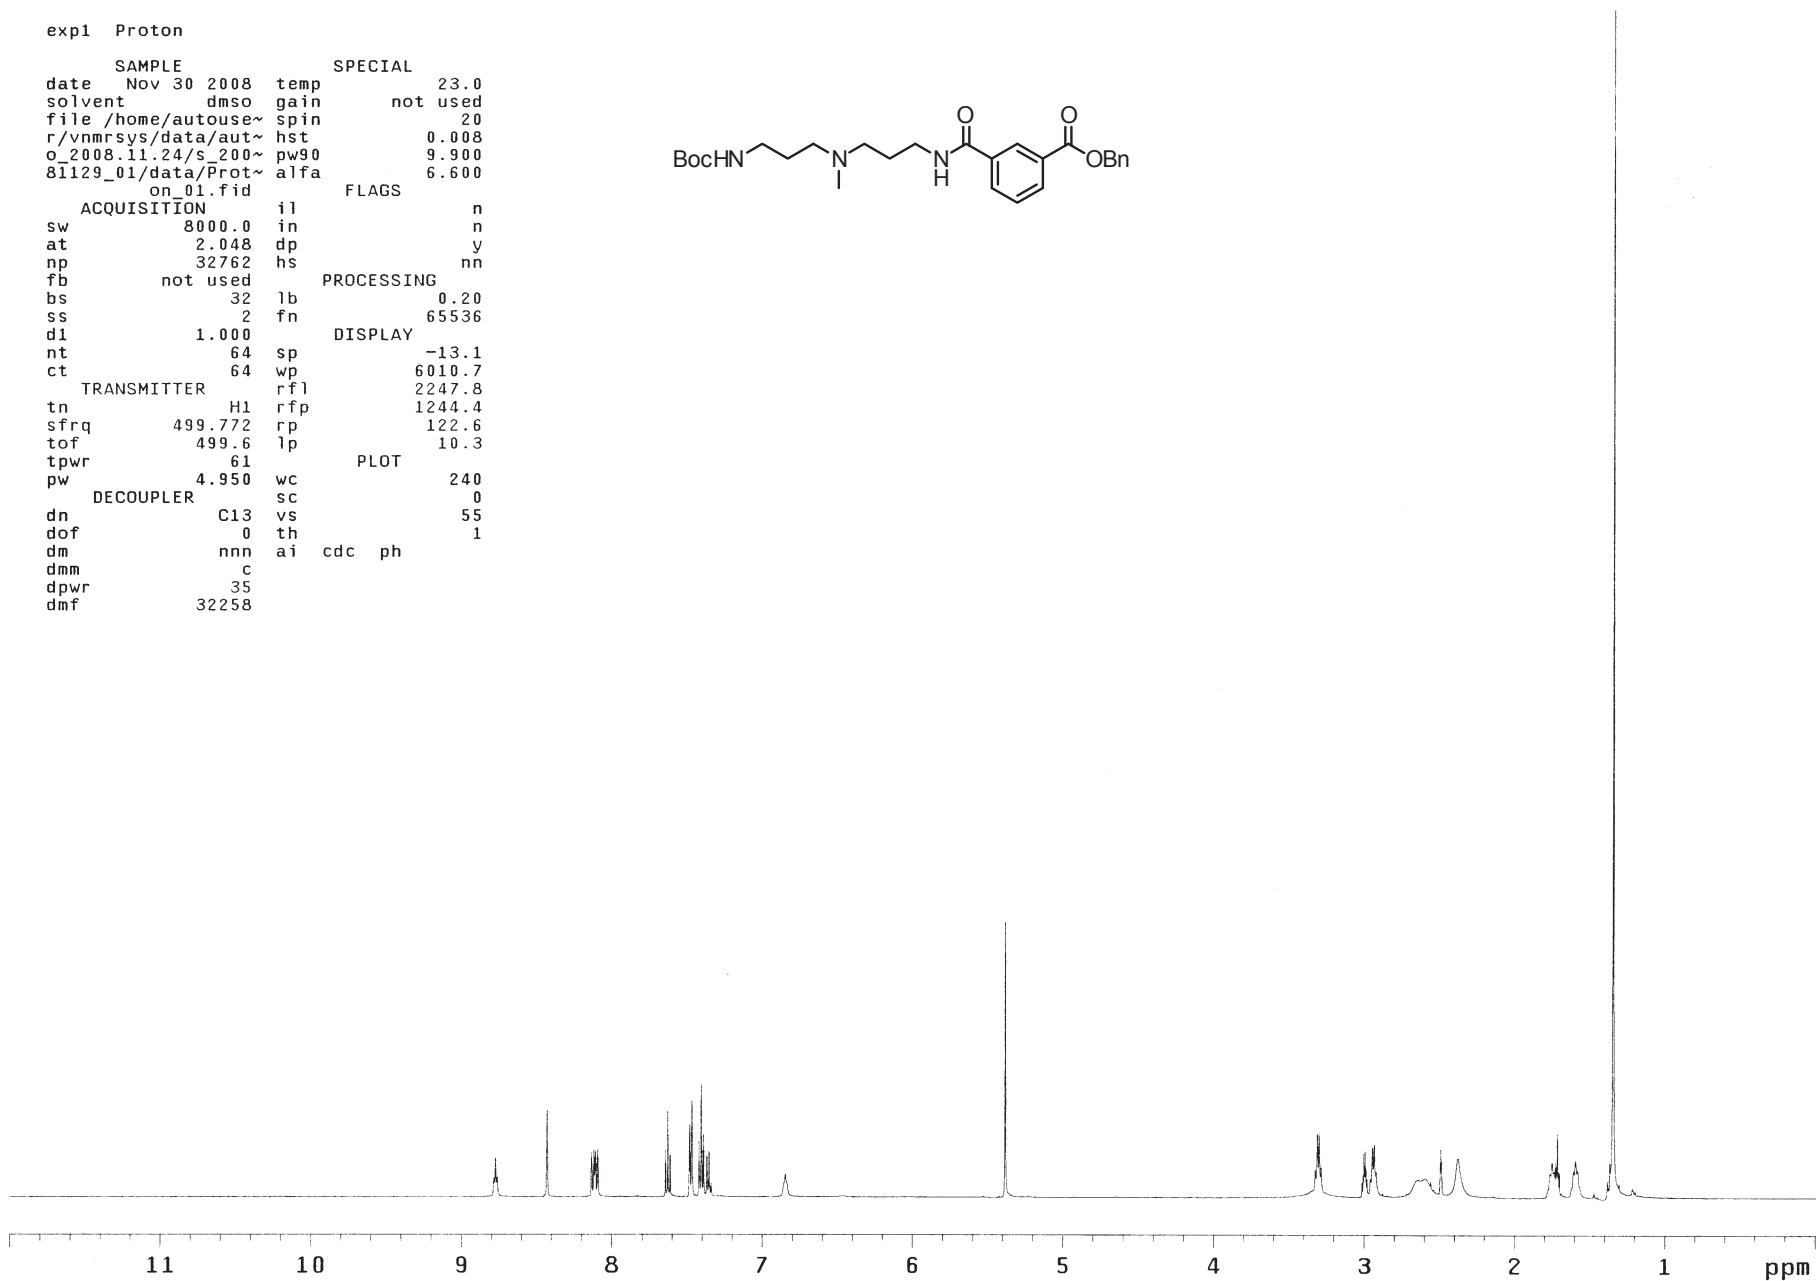

expl Carbon

```
SAMPLE
date Nov 30 2008 temp 23.0
solvent dmsd gain 30
file /home/autouse~ spin 20
r/vnmrSYS/data/aut~ hst 0.008
o_2008.11.24/s_200~ pw90 8.500
81129_01/data/Carb~ alfa 10.000
on_01.fid
ACQUISITION il n
sw 30165.9 in n
at 1.300 dp y
np 78430 hs nn
fb not used
bs 64 lb 0.50
d1 1.000 fn not used
nt 6000
ct 6000 sp DISPLAY -43.2
TRANSMITTER wp 25165.3
tn C13 rfl 6940.8
sfrq 125.680 rfp 4963.8
tof 1255.2 rp -167.4
tpwr 56 lp -95.9
pw 4.250
DECOUPLER wc PLOT 240
dn H1 sc 0
dof 0 vs 27002
dm yy th 6
dmm w ai cdc ph
dpwr 39
dmf 11500
```

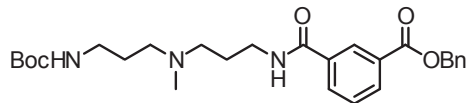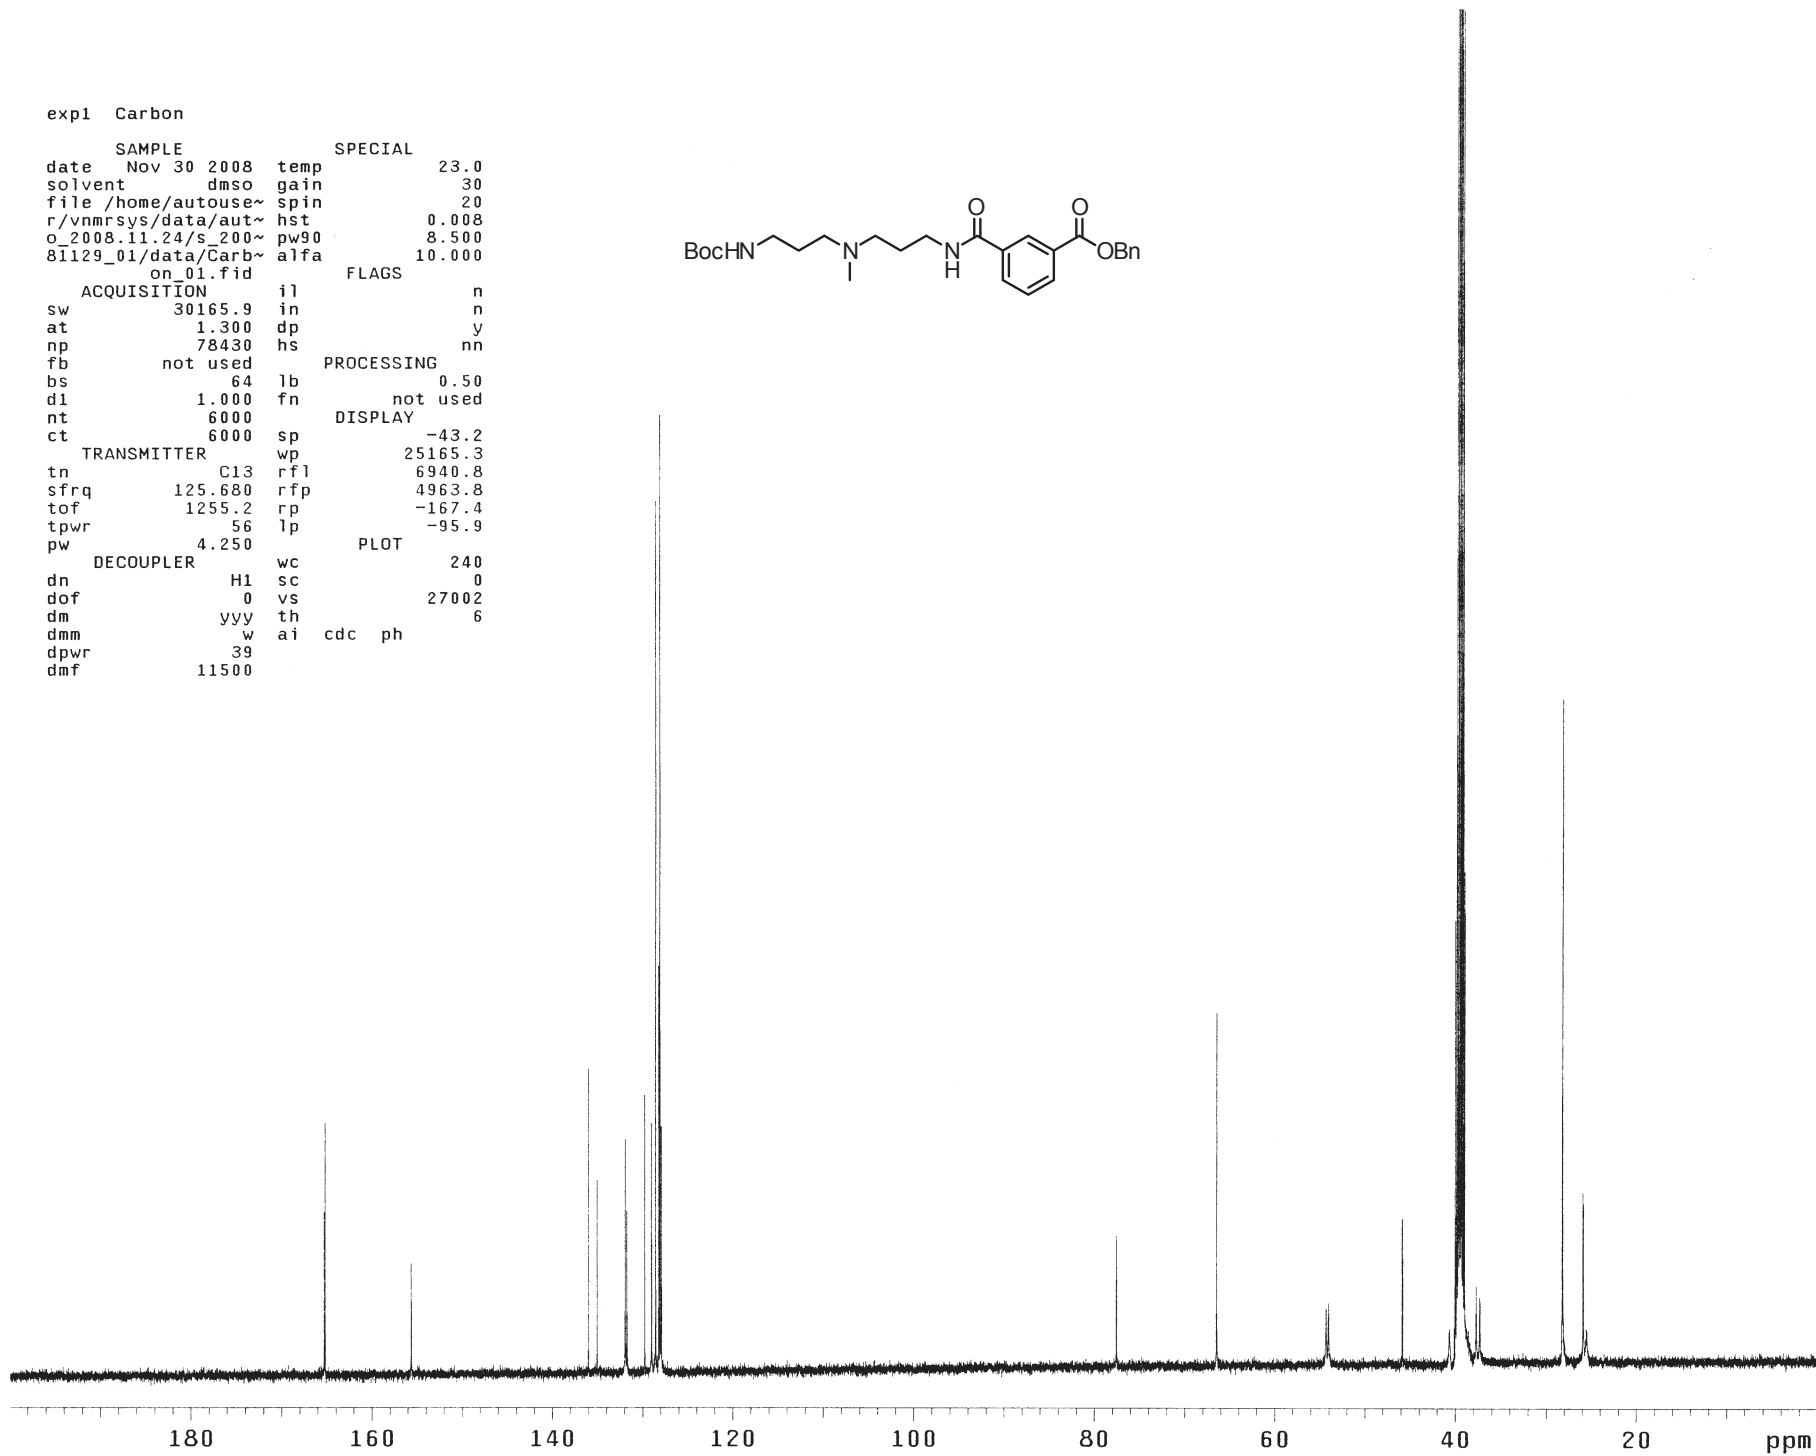

exp3 Proton

|             |                |            |          |
|-------------|----------------|------------|----------|
| SAMPLE      |                | SPECIAL    |          |
| date        | Dec 7 2008     | temp       | 25.0     |
| solvent     | dms            | gain       | not used |
| file        | /home/autouse~ | spin       | 20       |
| r/vnmr      | sys/data/aut~  | hst        | 0.008    |
| o_2008      | .12.05/s_200~  | pw90       | 9.900    |
| 81207_08    | /data/Prot~    | alfa       | 6.600    |
| on_01.fid   |                | FLAGS      |          |
| ACQUISITION |                | i1         | n        |
| sw          | 8000.0         | in         | n        |
| at          | 2.048          | dp         | y        |
| np          | 32762          | hs         | nn       |
| fb          | not used       | PROCESSING |          |
| bs          | 32             | lb         | 0.20     |
| ss          | 2              | fn         | 65536    |
| d1          | 1.000          | DISPLAY    |          |
| nt          | 512            | sp         | -11.7    |
| ct          | 512            | wp         | 6006.6   |
| TRANSMITTER |                | rfl        | 2248.0   |
| tn          | H1             | rfp        | 1244.4   |
| sfrq        | 499.772        | rp         | 140.2    |
| tof         | 499.6          | lp         | 7.4      |
| tpwr        | 61             | PLOT       |          |
| pw          | 4.950          | wc         | 240      |
| DECOUPLER   |                | sc         | 0        |
| dn          | C13            | vs         | 200      |
| dof         | 0              | th         | 3        |
| dm          | nnn            | ai         | cdc ph   |
| dmm         | c              |            |          |
| dpwr        | 35             |            |          |
| dmf         | 32258          |            |          |

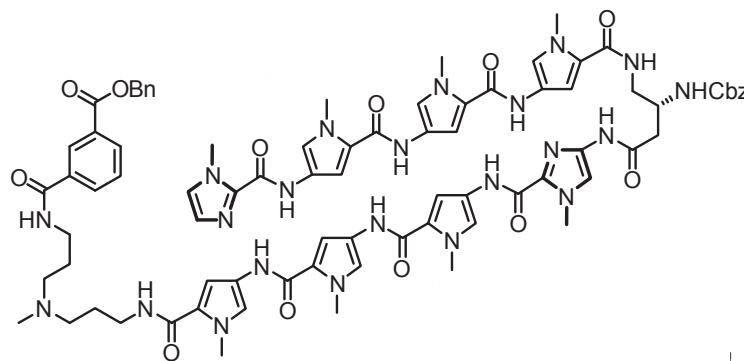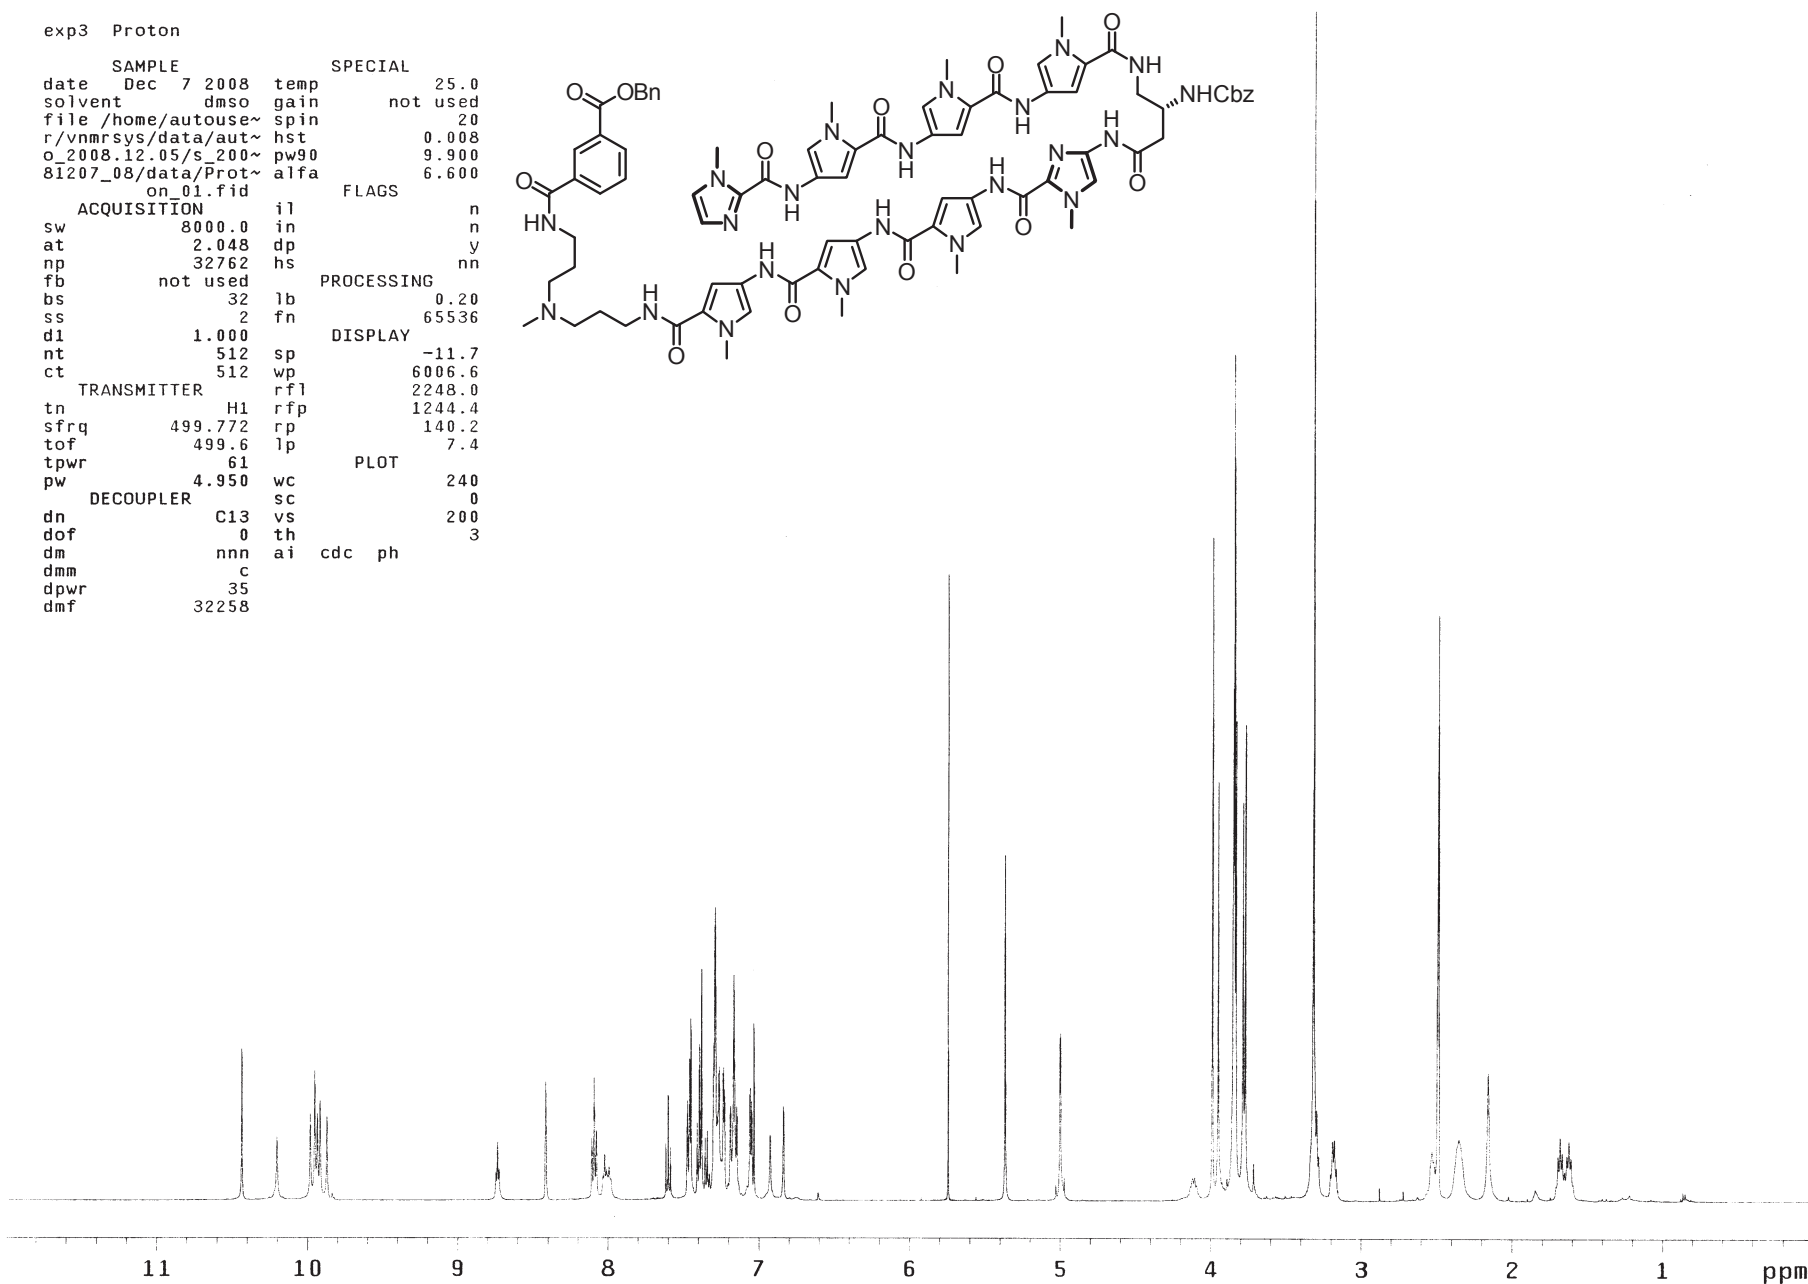

exp3 Carbon

|             |                |            |          |
|-------------|----------------|------------|----------|
| SAMPLE      |                | SPECIAL    |          |
| date        | Dec 11 2008    | temp       | 25.0     |
| solvent     | dms0           | gain       | 30       |
| file        | /home/autouse~ | spin       | 20       |
| r/vnmr      | sys/data/aut~  | hst        | 0.008    |
| o_2008      | .12.10/s_200~  | pw90       | 8.500    |
| 8I210_05    | /data/Carb~    | alfa       | 10.000   |
| on_01.fid   |                | FLAGS      |          |
| sw          | 30165.9        | il         | n        |
| at          | 1.300          | in         | n        |
| np          | 78430          | dp         | y        |
| fb          | not used       | hs         | nn       |
| ACQUISITION |                | PROCESSING |          |
| bs          | 64             | lb         | 0.50     |
| d1          | 1.000          | fn         | not used |
| nt          | 12000          | DISPLAY    |          |
| ct          | 12000          | sp         | 12.9     |
| TRANSMITTER |                | wp         | 25096.7  |
| tn          | C13            | rfl        | 7537.8   |
| sfrq        | 125.679        | rfp        | 4963.8   |
| tof         | 1255.2         | rp         | -158.9   |
| tpwr        | 56             | lp         | -95.8    |
| pw          | 4.250          | PLOT       |          |
| DECOUPLER   |                | wc         | 240      |
| dn          | H1             | sc         | 0        |
| dof         | 0              | vs         | 50000    |
| dm          | yyy            | th         | 3        |
| dmm         | w              | ai         | cdc ph   |
| dpwr        | 39             |            |          |
| dmf         | 11500          |            |          |

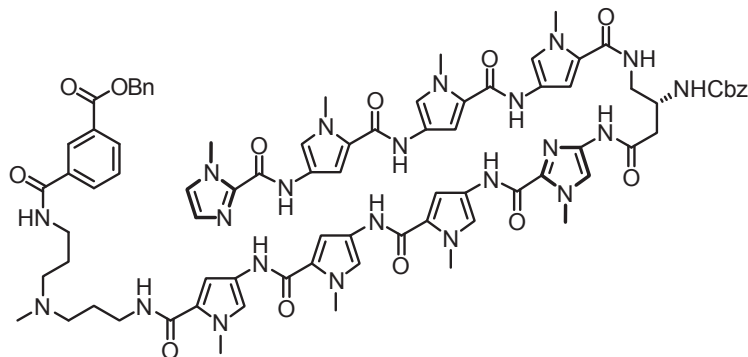

exp57 Proton

|             |                |            |          |
|-------------|----------------|------------|----------|
| SAMPLE      |                | SPECIAL    |          |
| date        | Feb 1 2009     | temp       | 25.0     |
| solvent     | dmsd           | gain       | not used |
| file        | /home/autouse~ | spin       | 20       |
| r/vnmr      | sys/data/aut~  | hst        | 0.008    |
| o_2009      | .01.29/s_200~  | pw90       | 9.700    |
| 90201_01    | /data/Prot~    | alfa       | 6.600    |
| on_01.fid   |                | FLAGS      |          |
| sw          | 8000.0         | il         | n        |
| at          | 2.048          | in         | n        |
| np          | 32762          | dp         | y        |
| fb          | not used       | hs         | nn       |
| bs          | 32             | fn         | 65536    |
| ss          | 2              | PROCESSING |          |
| d1          | 1.000          | sp         | -1.7     |
| nt          | 64             | wp         | 5995.1   |
| ct          | 64             | rfl        | 2248.5   |
| TRANSMITTER |                | rfp        | 1244.4   |
| tn          | H1             | rp         | 169.8    |
| sfrq        | 499.772        | lp         | -42.7    |
| tof         | 499.7          | PLOT       |          |
| tpwr        | 61             | wc         | 250      |
| pw          | 4.850          | sc         | 0        |
| DECOUPLER   |                | vs         | 250      |
| dn          | C13            | th         | 3        |
| dof         | 0              | ai         | cdc ph   |
| dm          | nnn            |            |          |
| dmm         | c              |            |          |
| dpwr        | 35             |            |          |
| dmf         | 32258          |            |          |

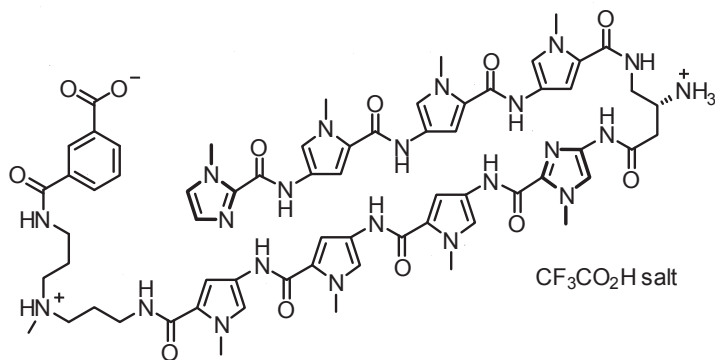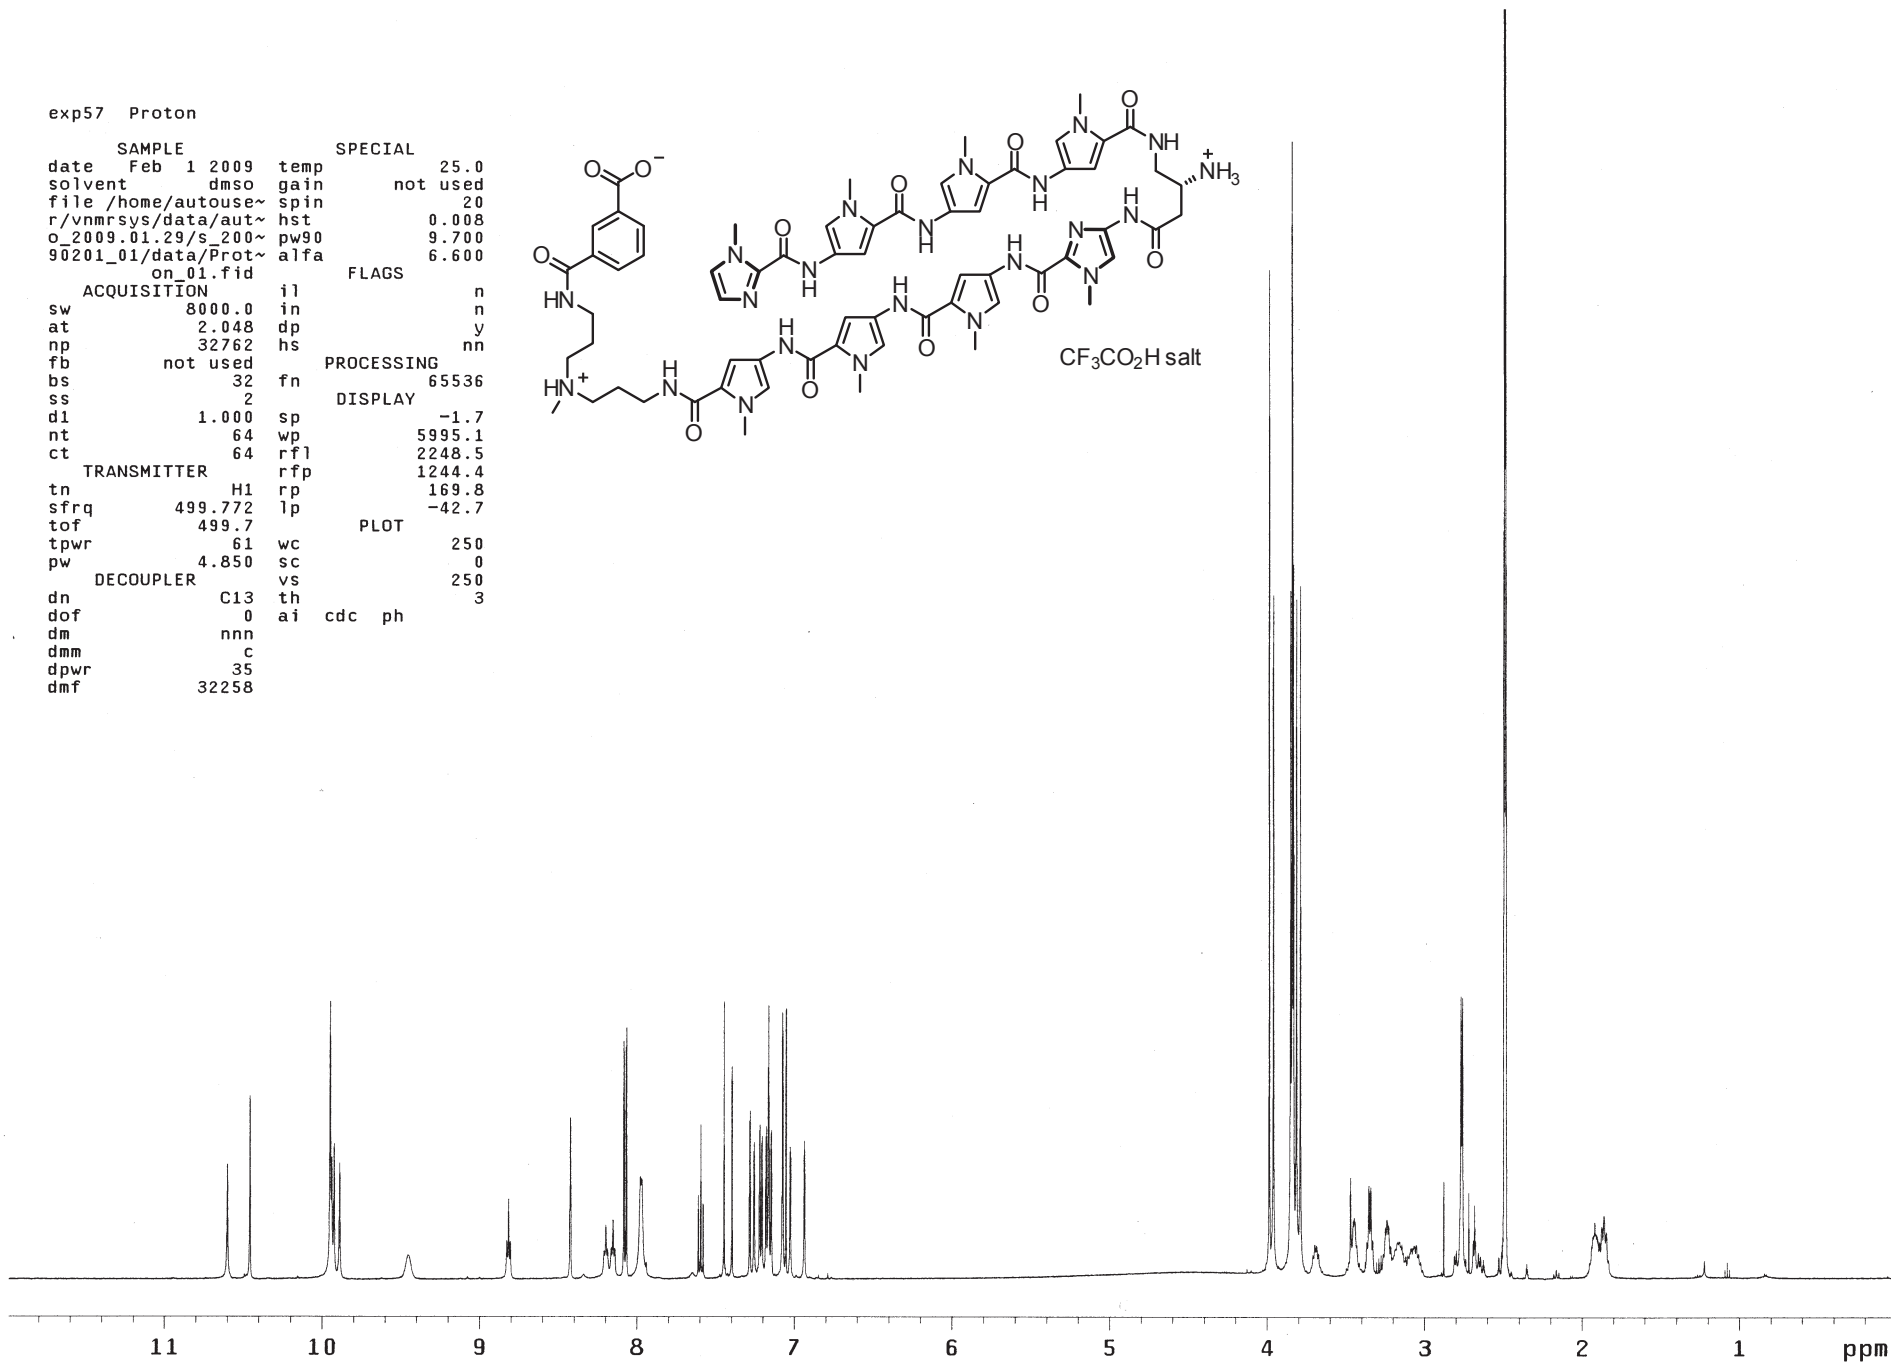

Supplement: NIHMS115452-supplement-1_si_001.pdf [file NIHMS115452-supplement-1_si_001.pdf]
